# Supplementary material
Source: Royal Society of Chemistry journal article supplement (doi:10.1039/d6an00149a)
Supplement: d6an00149a3.xlsx [file d6an00149a3.xlsx]

## Sheet: sheet 1
Gene	Gene synonym	Ensembl	Gene description	Uniprot	Chromosome	Position	Protein class	Biological process	Molecular function	Disease involvement	Evidence	HPA evidence	UniProt evidence	NeXtProt evidence	RNA tissue specificity	RNA tissue distribution	RNA tissue specificity score	RNA tissue specific nTPM	RNA single cell type specificity	RNA single cell type distribution	RNA single cell type specificity score	RNA single cell type specific nTPM	RNA single nuclei brain specificity	RNA single nuclei brain distribution	RNA single nuclei brain specificity score	RNA single nuclei brain specific nTPM	RNA cancer specificity	RNA cancer distribution	RNA cancer specificity score	RNA cancer specific FPKM	RNA brain regional specificity	RNA brain regional distribution	RNA brain regional specificity score	RNA brain regional specific nTPM	RNA blood cell specificity	RNA blood cell distribution	RNA blood cell specificity score	RNA blood cell specific nTPM	RNA blood lineage specificity	RNA blood lineage distribution	RNA blood lineage specificity score	RNA blood lineage specific nTPM	RNA cell line specificity	RNA cell line distribution	RNA cell line specificity score	RNA cell line specific nTPM	RNA tissue cell type enrichment	RNA mouse brain regional specificity	RNA mouse brain regional distribution
ABCA13	FLJ33876, FLJ33951	ENSG00000179869	ATP binding cassette subfamily A member 13		7	48171458-48647497	Predicted membrane proteins				Evidence at transcript level	Evidence at transcript level			Tissue enriched	Detected in some	15	bone marrow: 44.1	Group enriched	Detected in some	4	Basal respiratory cells: 34.1;Ciliated cells: 52.9;Club cells: 21.9;Ionocytes: 67.0	Cell type enhanced	Detected in many		ependymal cell: 45.7;hippocampal CA4: 97.4	Cancer enhanced	Detected in many		Lung Squamous Cell Carcinoma (TCGA): 7.4	Low region specificity	Detected in some			Not detected in immune cells	Not detected			Not detected	Not detected			Cancer enhanced	Detected in many		lymphoma: 5.2	Lung - Respiratory ciliated cells, Pituitary gland - Undifferentiated cells (Pituitary gland), Spleen - Hematopoietic stem cells	Not detected	Not detected
ABCC3	cMOAT2, EST90757, MLP2, MOAT-D, MRP3	ENSG00000108846	ATP binding cassette subfamily C member 3	O15438	17	50634777-50692253	Cancer-related genes, Enzymes, Metabolic proteins, Predicted intracellular proteins, Predicted membrane proteins, Transporters	Lipid transport, Transport	Translocase	Cancer-related genes	Evidence at protein level	Evidence at protein level	Evidence at protein level	Evidence at protein level	Tissue enhanced	Detected in many		adrenal gland: 57.3;liver: 49.1	Cell type enhanced	Detected in many		Cholangiocytes: 221.3;Distal enterocytes: 227.9;Exocrine glandular cells: 119.5;Gastric mucus-secreting cells: 229.3;Hepatocytes: 150.5;Late spermatids: 128.5;Paneth cells: 182.8	Group enriched	Detected in many	4	astrocyte: 7.7;central nervous system macrophage: 15.2;deep-layer intratelencephalic: 12.3;ependymal cell: 11.5;leukocyte: 17.0;midbrain-derived inhibitory: 5.1;thalamic excitatory: 16.8;upper-layer intratelencephalic: 4.7	Low cancer specificity	Detected in many			Low region specificity	Detected in all			Immune cell enhanced	Detected in some		intermediate monocyte: 5.1;non-classical monocyte: 6.4	Lineage enriched	Detected in many	5	monocytes: 6.4	Low cancer specificity	Detected in many			Minor Salivary Gland - Minor salivary glandular cells, Prostate - Prostate basal glandular cells, Spleen - Macrophages, Stomach - Gastric mucous cells	Low region specificity	Detected in many
ABITRAM	C9orf6, CG-8, FAM206A, FLJ20457, Simiate	ENSG00000119328	Actin binding transcription modulator	Q9NX38	9	108934400-108950744	Plasma proteins, Predicted intracellular proteins		Actin-binding		Evidence at protein level	Evidence at transcript level	Evidence at protein level	Evidence at protein level	Low tissue specificity	Detected in all			Low cell type specificity	Detected in many			Low cell type specificity	Detected in all			Low cancer specificity	Detected in all			Low region specificity	Detected in all			Low immune cell specificity	Detected in all			Low lineage specificity	Detected in all			Low cancer specificity	Detected in all			Testis - Early spermatids, Testis - Spermatocytes	Low region specificity	Detected in all
ABRAXAS2	ABRO1, Em:AC068896.4, FAM175B, KIAA0157	ENSG00000165660	Abraxas 2, BRISC complex subunit	Q15018	10	124801819-124836667	Predicted intracellular proteins	Cell cycle, Cell division, Mitosis, Ubl conjugation pathway			Evidence at protein level	Evidence at protein level	Evidence at protein level	Evidence at protein level	Low tissue specificity	Detected in all			Low cell type specificity	Detected in all			Low cell type specificity	Detected in all			Low cancer specificity	Detected in all			Low region specificity	Detected in all			Low immune cell specificity	Detected in all			Low lineage specificity	Detected in all			Low cancer specificity	Detected in all				Low region specificity	Detected in all
ACAA2	DSAEC	ENSG00000167315	Acetyl-CoA acyltransferase 2	P42765	18	49782164-49813953	Enzymes, Metabolic proteins, Plasma proteins, Predicted intracellular proteins	Fatty acid metabolism, Lipid metabolism	Acyltransferase, Hydrolase, Transferase		Evidence at protein level	Evidence at protein level	Evidence at protein level	Evidence at protein level	Tissue enhanced	Detected in all		liver: 981.1	Cell type enhanced	Detected in all		Distal enterocytes: 387.5;Hepatocytes: 954.2;Proximal tubular cells: 586.9	Low cell type specificity	Detected in many			Low cancer specificity	Detected in all			Low region specificity	Detected in all			Low immune cell specificity	Detected in all			Low lineage specificity	Detected in all			Low cancer specificity	Detected in all			Adipose subcutaneous - Adipocytes (Subcutaneous), Adipose visceral - Adipocytes (Visceral), Adrenal gland - Adrenal cortex cells, Breast - Adipocytes (Breast), Kidney - Proximal tubular cells, Liver - Hepatocytes, Pancreas - Macrophages, Skin - Sebaceous gland cells, Spleen - Macrophages, Testis - Spermatogonia	Low region specificity	Detected in all
ACLY	ACL, ATPCL, CLATP	ENSG00000131473	ATP citrate lyase	P53396	17	41866917-41930542	Cancer-related genes, Citric acid cycle related proteins, Enzymes, FDA approved drug targets, Metabolic proteins, Plasma proteins, Predicted intracellular proteins	Lipid biosynthesis, Lipid metabolism	Transferase	Cancer-related genes, FDA approved drug targets	Evidence at protein level	Evidence at protein level	Evidence at protein level	Evidence at protein level	Low tissue specificity	Detected in all			Low cell type specificity	Detected in all			Low cell type specificity	Detected in all			Low cancer specificity	Detected in all			Low region specificity	Detected in all			Low immune cell specificity	Detected in all			Low lineage specificity	Detected in all			Low cancer specificity	Detected in all			Colon - Macrophages, Prostate - Prostate glandular cells, Testis - Spermatogonia	Low region specificity	Detected in all
ACTN1		ENSG00000072110	Actinin alpha 1	P12814	14	68874128-68979440	Disease related genes, FDA approved drug targets, Human disease related genes, Plasma proteins, Predicted intracellular proteins		Actin-binding	Disease variant, FDA approved drug targets	Evidence at protein level	Evidence at protein level	Evidence at protein level	Evidence at protein level	Tissue enhanced	Detected in all		smooth muscle: 515.0	Cell type enhanced	Detected in many		Extravillous trophoblasts: 369.9;Pancreatic endocrine cells: 336.2	Cell type enhanced	Detected in all		vascular associated smooth muscle cell: 424.2	Low cancer specificity	Detected in all			Low region specificity	Detected in all			Immune cell enhanced	Detected in many		neutrophil: 346.0	Low lineage specificity	Detected in many			Cancer enhanced	Detected in all		Adrenocortical cancer: 1086.0	Colon - Smooth muscle cells, Lung - Smooth muscle cells, Minor Salivary Gland - Minor salivary glandular cells, Pituitary gland - Endothelial cells, Prostate - Smooth muscle cells, Skin - Outer root sheath cells, Spleen - Fibroblast_1	Low region specificity	Detected in all
ACTN2		ENSG00000077522	Actinin alpha 2	P35609	1	236664141-236764631	Disease related genes, Human disease related genes, Plasma proteins, Potential drug targets, Predicted intracellular proteins, Transporters		Actin-binding	Cardiomyopathy, Disease variant	Evidence at protein level	Evidence at protein level	Evidence at protein level	Evidence at protein level	Group enriched	Detected in many	38	heart muscle: 717.1;skeletal muscle: 2019.8;tongue: 1230.1	Group enriched	Detected in some	9	Cardiomyocytes: 2084.9;Skeletal myocytes: 745.5	Cell type enhanced	Detected in all		mammillary body: 315.0	Cancer enhanced	Detected in some		Glioblastoma Multiforme (TCGA): 6.5;Head and Neck Squamous Cell Carcinoma (TCGA): 11.2	Region enhanced	Detected in many		basal ganglia: 12.2	Not detected in immune cells	Not detected			Not detected	Not detected			Group enriched	Detected in some	5	Bone cancer: 1.5;Sarcoma: 1.7	Heart muscle - Cardiomyocytes, Skeletal muscle - Skeletal myocytes, Skeletal muscle - Skeletal myocytes	Region enhanced	Detected in many
ACTN3		ENSG00000248746	Actinin alpha 3	Q08043	11	66546395-66563334	Plasma proteins, Predicted intracellular proteins		Actin-binding		Evidence at protein level	Evidence at protein level	Evidence at protein level	Evidence at protein level	Tissue enriched	Detected in some	72	skeletal muscle: 1612.5	Cell type enriched	Detected in some	6	Skeletal myocytes: 114.2	Not detected	Not detected			Not detected	Not detected			Low region specificity	Detected in many			Not detected in immune cells	Not detected			Not detected	Not detected			Cancer enriched	Detected in some	5	Rhabdoid: 5.5	Skeletal muscle - Skeletal myocytes, Testis - Early spermatids, Testis - Late spermatids	Low region specificity	Detected in single
ACTN4	FSGS1	ENSG00000130402	Actinin alpha 4	O43707	19	38647649-38731589	Disease related genes, Human disease related genes, Plasma proteins, Predicted intracellular proteins	Protein transport, Transport	Actin-binding	Disease variant	Evidence at protein level	Evidence at protein level	Evidence at protein level	Evidence at protein level	Low tissue specificity	Detected in all			Cell type enhanced	Detected in all		Alveolar cells type 1: 607.7	Cell type enhanced	Detected in all		vascular associated smooth muscle cell: 671.8	Low cancer specificity	Detected in all			Low region specificity	Detected in all			Low immune cell specificity	Detected in all			Low lineage specificity	Detected in all			Low cancer specificity	Detected in all			Adrenal gland - Adrenal cortex cells, Testis - Endothelial cells	Low region specificity	Detected in all
ACTR1A	ARP1, Arp1A	ENSG00000138107	Actin related protein 1A	P61163	10	102461881-102502712	Plasma proteins, Predicted intracellular proteins				Evidence at protein level	Evidence at protein level	Evidence at protein level	Evidence at protein level	Low tissue specificity	Detected in all			Low cell type specificity	Detected in all			Low cell type specificity	Detected in all			Low cancer specificity	Detected in all			Low region specificity	Detected in all			Low immune cell specificity	Detected in all			Low lineage specificity	Detected in all			Low cancer specificity	Detected in all			Lung - Endothelial cells, Prostate - Smooth muscle cells	Low region specificity	Detected in all
ACTR1B	Arp1B, CTRN2	ENSG00000115073	Actin related protein 1B	P42025	2	97655939-97664044	Plasma proteins, Predicted intracellular proteins				Evidence at protein level	Evidence at transcript level	Evidence at protein level	Evidence at protein level	Low tissue specificity	Detected in all			Low cell type specificity	Detected in all			Low cell type specificity	Detected in all			Low cancer specificity	Detected in all			Low region specificity	Detected in all			Low immune cell specificity	Detected in all			Low lineage specificity	Detected in all			Low cancer specificity	Detected in all				Low region specificity	Detected in all
ACVR1B	ActRIB, ACVRLK4, ALK4, SKR2	ENSG00000135503	Activin A receptor type 1B	P36896	12	51951699-51997078	Cancer-related genes, Disease related genes, Enzymes, Potential drug targets, Predicted intracellular proteins, Predicted membrane proteins		Kinase, Receptor, Serine/threonine-protein kinase, Transferase	Cancer-related genes	Evidence at protein level	Evidence at protein level	Evidence at protein level	Evidence at protein level	Low tissue specificity	Detected in all			Low cell type specificity	Detected in many			Low cell type specificity	Detected in all			Low cancer specificity	Detected in all			Low region specificity	Detected in all			Immune cell enhanced	Detected in many		eosinophil: 3.9	Low lineage specificity	Detected in many			Low cancer specificity	Detected in all			Skin - Keratinocyte (other), Testis - Spermatogonia	Low region specificity	Detected in all
ADAMTS20	GON-1	ENSG00000173157	ADAM metallopeptidase with thrombospondin type 1 motif 20	P59510	12	43353866-43552203	Cancer-related genes, Predicted intracellular proteins, Predicted secreted proteins		Hydrolase, Metalloprotease, Protease	Cancer-related genes	Evidence at protein level	Evidence at transcript level	Evidence at transcript level	Evidence at protein level	Not detected	Not detected			Group enriched	Detected in some	4	Bipolar cells: 4.6;Inhibitory neurons: 15.4;Oligodendrocyte precursor cells: 10.4	Group enriched	Detected in many	6	committed oligodendrocyte precursor: 52.2;lower rhombic lip: 192.9	Not detected	Not detected			Group enriched	Detected in some	8	medulla oblongata: 3.6;pons: 6.7	Not detected in immune cells	Not detected			Not detected	Not detected			Cancer enhanced	Detected in some		Rhabdoid: 9.4	Testis - Spermatogonia	Low region specificity	Detected in all
ADCY2	AC2, HBAC2, KIAA1060	ENSG00000078295	Adenylate cyclase 2	Q08462	5	7396138-7830081	Enzymes, Metabolic proteins, Predicted intracellular proteins, Predicted membrane proteins	cAMP biosynthesis	Lyase		Evidence at protein level	Evidence at transcript level	Evidence at protein level	Evidence at protein level	Group enriched	Detected in many	6	brain: 36.6;skeletal muscle: 66.0;tongue: 29.6	Cell type enhanced	Detected in many		Astrocytes: 613.7;Excitatory neurons: 392.3;Inhibitory neurons: 405.6;Oligodendrocyte precursor cells: 170.3;Skeletal myocytes: 109.3	Cell type enhanced	Detected in all		astrocyte: 1868.4	Cancer enriched	Detected in many	4	Glioblastoma Multiforme (TCGA): 15.0	Low region specificity	Detected in all			Not detected in immune cells	Not detected			Not detected	Not detected			Cancer enhanced	Detected in some		skin cancer: 5.0;testis cancer: 3.5	Breast - Fibroblasts	Low region specificity	Detected in all
ADCY3	AC3	ENSG00000138031	Adenylate cyclase 3	O60266	2	24819169-24920237	Disease related genes, Enzymes, Human disease related genes, Metabolic proteins, Plasma proteins, Predicted intracellular proteins, Predicted membrane proteins	cAMP biosynthesis, Olfaction, Sensory transduction	Calmodulin-binding, Lyase	Obesity	Evidence at protein level	Evidence at protein level	Evidence at protein level	Evidence at protein level	Low tissue specificity	Detected in all			Cell type enhanced	Detected in many		Endometrial stromal cells: 41.5;Leydig cells: 60.4;Sertoli cells: 46.2;Smooth muscle cells: 66.7	Low cell type specificity	Detected in all			Low cancer specificity	Detected in all			Low region specificity	Detected in all			Low immune cell specificity	Detected in many			Low lineage specificity	Detected in all			Low cancer specificity	Detected in all			Adrenal gland - Fibroblasts, Colon - Endothelial cells, Spleen - Fibroblast_2	Low region specificity	Detected in all
ADCY5	AC5	ENSG00000173175	Adenylate cyclase 5	O95622	3	123282296-123449090	Disease related genes, Enzymes, Human disease related genes, Metabolic proteins, Predicted membrane proteins	cAMP biosynthesis	Lyase	Disease variant, Intellectual disability	Evidence at protein level	Evidence at transcript level	Evidence at protein level	Evidence at protein level	Tissue enhanced	Detected in many		brain: 67.0;heart muscle: 102.3	Cell type enhanced	Detected in many		Cardiomyocytes: 92.9;Horizontal cells: 37.8;Inhibitory neurons: 42.1;Oligodendrocytes: 83.5;Oocytes: 45.6;Paneth cells: 54.4;Peritubular cells: 70.5	Cell type enhanced	Detected in all		eccentric medium spiny neuron: 336.9;medium spiny neuron: 668.8	Cancer enhanced	Detected in many		Kidney Renal Clear Cell Carcinoma (TCGA): 15.9	Low region specificity	Detected in all			Not detected in immune cells	Not detected			Not detected	Not detected			Cancer enhanced	Detected in some		breast cancer: 8.4	Adipose subcutaneous - Adipocytes (Subcutaneous), Adipose visceral - Adipocytes (Visceral), Heart muscle - Cardiomyocytes, Liver - Hepatic stellate cells, Lung - Smooth muscle cells, Minor Salivary Gland - Smooth muscle cells, Thyroid gland - Smooth muscle cells	Region enriched	Detected in all
ADCY9	AC9	ENSG00000162104	Adenylate cyclase 9	O60503	16	3953387-4116442	Enzymes, Metabolic proteins, Predicted intracellular proteins, Predicted membrane proteins	cAMP biosynthesis	Lyase		Evidence at protein level	Evidence at protein level	Evidence at protein level	Evidence at protein level	Tissue enhanced	Detected in all		skeletal muscle: 51.0	Cell type enhanced	Detected in many		Excitatory neurons: 92.1;Inhibitory neurons: 69.6;Oocytes: 287.5	Low cell type specificity	Detected in all			Low cancer specificity	Detected in all			Low region specificity	Detected in all			Not detected in immune cells	Not detected			Not detected	Not detected			Low cancer specificity	Detected in many			Spleen - Endothelial cells, Testis - Sertoli cells, Thyroid gland - Thyroid glandular cells	Low region specificity	Detected in all
ADGRV1	DKFZp761P0710, FEB4, GPR98, KIAA0686, MASS1, USH2C, VLGR1	ENSG00000164199	Adhesion G protein-coupled receptor V1	Q8WXG9	5	90529344-91164437	Disease related genes, G-protein coupled receptors, Human disease related genes, Potential drug targets, Predicted intracellular proteins, Predicted membrane proteins, Transporters	Sensory transduction, Vision	G-protein coupled receptor, Hydrolase, Receptor, Transducer	Deafness, Retinitis pigmentosa, Usher syndrome	Evidence at protein level	Evidence at transcript level	Evidence at protein level	Evidence at protein level	Tissue enriched	Detected in many	12	adrenal gland: 516.2	Cell type enriched	Detected in many	11	Astrocytes: 2093.4	Group enriched	Detected in all	5	astrocyte: 2313.8;choroid plexus epithelial cell: 1103.6;ependymal cell: 936.9	Low cancer specificity	Detected in many			Low region specificity	Detected in all			Low immune cell specificity	Detected in many			Low lineage specificity	Detected in all			Cancer enhanced	Detected in many		Gallbladder cancer: 26.4	Adrenal gland - Adrenal cortex cells, Kidney - Ascending Loop of Henle cells, Liver - Hepatocytes, Lung - Alveolar cells type 2, Prostate - Prostate glandular cells, Skin - Eccrine sweat gland cells, Thyroid gland - Thyroid glandular cells	Low region specificity	Detected in all
ADH1A	ADH1	ENSG00000187758	Alcohol dehydrogenase 1A (class I), alpha polypeptide	P07327	4	99276369-99291003	Enzymes, FDA approved drug targets, Metabolic proteins, Plasma proteins, Predicted intracellular proteins		Oxidoreductase	FDA approved drug targets	Evidence at protein level	Evidence at protein level	Evidence at protein level	Evidence at protein level	Tissue enriched	Detected in some	305	liver: 2653.7	Cell type enriched	Detected in some	11	Hepatocytes: 208.0	Not detected	Not detected			Cancer enriched	Detected in some	239	Liver Hepatocellular Carcinoma (TCGA): 348.5	Not detected	Not detected			Not detected in immune cells	Not detected			Not detected	Not detected			Not detected	Not detected			Adipose subcutaneous - Adipocytes (Subcutaneous), Liver - Hepatocytes, Minor Salivary Gland - Adipocytes (Minor salivary gland)
ADH1B	ADH2	ENSG00000196616	Alcohol dehydrogenase 1B (class I), beta polypeptide	P00325	4	99304971-99352760	Enzymes, FDA approved drug targets, Human disease related genes, Metabolic proteins, Plasma proteins, Predicted intracellular proteins	Lipid metabolism	Oxidoreductase	FDA approved drug targets	Evidence at protein level	Evidence at protein level	Evidence at protein level	Evidence at protein level	Tissue enhanced	Detected in many		adipose tissue: 1449.1;liver: 5678.8	Cell type enhanced	Detected in many		Fibroblasts: 761.6;Hepatocytes: 4180.2;Mesothelial cells: 1146.2	Group enriched	Detected in some	39	fibroblast: 44.1;pericyte: 47.6;vascular associated smooth muscle cell: 15.1	Cancer enriched	Detected in many	28	Liver Hepatocellular Carcinoma (TCGA): 717.1	Region enhanced	Detected in many		choroid plexus: 24.6	Not detected in immune cells	Not detected			Not detected	Not detected			Not detected	Not detected			Adipose subcutaneous - Adipocytes (Subcutaneous), Adrenal gland - Fibroblasts, Breast - Adipocytes (Breast), Kidney - Fibroblasts, Liver - Hepatocytes, Pancreas - Fibroblasts, Spleen - Fibroblast_2, Testis - Endothelial cells
ADH1C	ADH3	ENSG00000248144	Alcohol dehydrogenase 1C (class I), gamma polypeptide	P00326	4	99336497-99352746	Enzymes, FDA approved drug targets, Human disease related genes, Metabolic proteins, Plasma proteins, Predicted intracellular proteins		Oxidoreductase	FDA approved drug targets	Evidence at protein level	Evidence at protein level	Evidence at protein level	Evidence at protein level	Group enriched	Detected in many	21	intestine: 581.0;liver: 1997.6;stomach 1: 555.8	Cell type enhanced	Detected in many		Distal enterocytes: 230.3;Enteroendocrine cells: 216.1;Exocrine glandular cells: 344.5;Gastric mucus-secreting cells: 669.1;Hepatocytes: 514.4;Undifferentiated cells: 339.5	Not detected	Not detected			Cancer enriched	Detected in many	7	Liver Hepatocellular Carcinoma (TCGA): 394.0	Not detected	Not detected			Not detected in immune cells	Not detected			Not detected	Not detected			Cancer enhanced	Detected in many		liver cancer: 53.7	Liver - Hepatocytes, Minor Salivary Gland - Minor salivary gland ductal cells, Stomach - Gastric mucous cells
ADORA1	RDC7	ENSG00000163485	Adenosine A1 receptor	P30542	1	203090654-203167405	FDA approved drug targets, G-protein coupled receptors, Predicted membrane proteins, Transporters		G-protein coupled receptor, Receptor, Transducer	FDA approved drug targets	Evidence at protein level	Evidence at protein level	Evidence at protein level	Evidence at protein level	Tissue enhanced	Detected in many		brain: 44.2;testis: 20.9	Cell type enhanced	Detected in some		Ductal cells: 12.9;Excitatory neurons: 17.5;Muller glia cells: 40.9;Oligodendrocyte precursor cells: 33.0;Oligodendrocytes: 29.3	Low cell type specificity	Detected in many			Cancer enhanced	Detected in many		Glioblastoma Multiforme (TCGA): 53.2	Low region specificity	Detected in all			Not detected in immune cells	Not detected			Not detected	Not detected			Cancer enhanced	Detected in many		Kidney cancer: 51.9	Adipose subcutaneous - Adipocytes (Subcutaneous), Heart muscle - Cardiomyocytes, Kidney - Podocytes, Skin - Eccrine sweat gland cells, Testis - Sertoli cells	Low region specificity	Detected in all
ADRB2	ADRB2R, ADRBR, B2AR, BAR	ENSG00000169252	Adrenoceptor beta 2	P07550	5	148826611-148828623	FDA approved drug targets, G-protein coupled receptors, Human disease related genes, Predicted membrane proteins, Transporters		G-protein coupled receptor, Receptor, Transducer	FDA approved drug targets	Evidence at protein level	Evidence at protein level	Evidence at protein level	Evidence at protein level	Low tissue specificity	Detected in many			Cell type enhanced	Detected in many		Adipocytes: 191.0;Basal keratinocytes: 282.8;Basal respiratory cells: 137.6;Basal squamous epithelial cells: 174.8;granulocytes: 187.1;Squamous epithelial cells: 272.6;Suprabasal keratinocytes: 166.8	Cell type enhanced	Detected in some		central nervous system macrophage: 63.3;leukocyte: 27.5	Cancer enhanced	Detected in many		Prostate Adenocarcinoma (TCGA): 18.4	Low region specificity	Detected in all			Low immune cell specificity	Detected in all			Low lineage specificity	Detected in all			Cancer enhanced	Detected in many		head and neck cancer: 50.9	Colon - Endothelial cells	Low region specificity	Detected in all
ADRB3		ENSG00000188778	Adrenoceptor beta 3	P13945	8	37962990-37966599	FDA approved drug targets, G-protein coupled receptors, Human disease related genes, Predicted membrane proteins		G-protein coupled receptor, Receptor, Transducer	Diabetes mellitus, FDA approved drug targets, Obesity	Evidence at protein level	Evidence at transcript level	Evidence at protein level	Evidence at protein level	Tissue enhanced	Detected in some		fallopian tube: 3.9;ovary: 11.3;urinary bladder: 4.5	Cell type enriched	Detected in some	8	Ovarian stromal cells: 14.0	Not detected	Not detected			Not detected	Not detected			Low region specificity	Detected in all			Not detected in immune cells	Not detected			Not detected	Not detected			Cancer enriched	Detected in single	169	Bone cancer: 17.7	Prostate - Fibroblasts	Low region specificity	Detected in some
AGBL2	CCP2, FLJ23598	ENSG00000165923	AGBL carboxypeptidase 2	Q5U5Z8	11	47659591-47715389	Enzymes, Predicted intracellular proteins		Carboxypeptidase, Hydrolase, Metalloprotease, Protease		Evidence at protein level	Evidence at protein level	Evidence at protein level	Evidence at protein level	Tissue enhanced	Detected in many		fallopian tube: 7.4;testis: 12.0	Cell type enhanced	Detected in some		Ciliated cells: 33.0;Early spermatids: 46.8;Late spermatids: 10.4;Spermatocytes: 16.0	Cell type enriched	Detected in many	4	ependymal cell: 120.0	Not detected	Not detected			Low region specificity	Detected in many			Not detected in immune cells	Not detected			Not detected	Not detected			Low cancer specificity	Detected in some			Liver - Hepatocytes, Lung - Respiratory ciliated cells, Spleen - B-cells (Spleen), Testis - Early spermatids	Low region specificity	Detected in many
AGBL5	CCP5, FLJ21839	ENSG00000084693	AGBL carboxypeptidase 5	Q8NDL9	2	27042364-27070622	Disease related genes, Enzymes, Human disease related genes, Potential drug targets, Predicted intracellular proteins		Carboxypeptidase, Hydrolase, Metalloprotease, Protease	Disease variant, Retinitis pigmentosa	Evidence at protein level	Evidence at transcript level	Evidence at protein level	Evidence at protein level	Group enriched	Detected in all	4	parathyroid gland: 48.3;testis: 187.3	Group enriched	Detected in many	6	Early spermatids: 344.6;Late spermatids: 336.1;Spermatocytes: 129.8	Low cell type specificity	Detected in all			Low cancer specificity	Detected in all			Low region specificity	Detected in all			Low immune cell specificity	Detected in many			Low lineage specificity	Detected in all			Low cancer specificity	Detected in all			Adrenal gland - Adrenal cortex cells, Spleen - Endothelial cells, Testis - Early spermatids, Thyroid gland - Thyroid glandular cells	Low region specificity	Detected in all
AGTPBP1	CCP1, KIAA1035, Nna1	ENSG00000135049	ATP/GTP binding carboxypeptidase 1	Q9UPW5	9	85546539-85742029	Disease related genes, Enzymes, Potential drug targets, Predicted intracellular proteins		Carboxypeptidase, Hydrolase, Metalloprotease, Protease	Disease variant, Neurodegeneration	Evidence at protein level	Evidence at protein level	Evidence at protein level	Evidence at protein level	Tissue enhanced	Detected in all		bone marrow: 59.5;retina: 45.1	Cell type enhanced	Detected in many		Excitatory neurons: 170.7;Inhibitory neurons: 156.2;Oligodendrocytes: 431.5	Low cell type specificity	Detected in all			Low cancer specificity	Detected in all			Low region specificity	Detected in all			Low immune cell specificity	Detected in all			Low lineage specificity	Detected in all			Low cancer specificity	Detected in all			Spleen - Neutrophils, Testis - Early spermatids	Low region specificity	Detected in all
AHI1	FLJ20069, JBTS3, ORF1	ENSG00000135541	Abelson helper integration site 1	Q8N157	6	135283407-135498434	Disease related genes, Human disease related genes, Predicted intracellular proteins	Cilium biogenesis/degradation, Differentiation	Developmental protein	Ciliopathy, Disease variant, Joubert syndrome	Evidence at protein level	Evidence at protein level	Evidence at protein level	Evidence at protein level	Low tissue specificity	Detected in all			Cell type enhanced	Detected in all		Cone photoreceptor cells: 895.4;Excitatory neurons: 611.9;Inhibitory neurons: 627.7;Rod photoreceptor cells: 2519.2	Low cell type specificity	Detected in all			Low cancer specificity	Detected in many			Low region specificity	Detected in all			Low immune cell specificity	Detected in many			Low lineage specificity	Detected in all			Low cancer specificity	Detected in all			Testis - Early spermatids	Low region specificity	Detected in all
AIDA	C1orf80, FLJ12806	ENSG00000186063	Axin interactor, dorsalization associated	Q96BJ3	1	222668013-222713210	Predicted intracellular proteins		Developmental protein		Evidence at protein level	Evidence at protein level	Evidence at protein level	Evidence at protein level	Low tissue specificity	Detected in all			Low cell type specificity	Detected in all			Cell type enhanced	Detected in all		central nervous system macrophage: 86.5	Low cancer specificity	Detected in all			Low region specificity	Detected in all			Low immune cell specificity	Detected in all			Low lineage specificity	Detected in all			Low cancer specificity	Detected in all			Testis - Spermatocytes	Low region specificity	Detected in all
AKT1	AKT, PKB, PRKBA, RAC, RAC-alpha	ENSG00000142208	AKT serine/threonine kinase 1	P31749	14	104769349-104795751	Cancer-related genes, Disease related genes, Enzymes, Human disease related genes, Potential drug targets, Predicted intracellular proteins, RAS pathway related proteins, Transporters	Apoptosis, Carbohydrate metabolism, Glucose metabolism, Glycogen biosynthesis, Glycogen metabolism, Neurogenesis, Sugar transport, Translation regulation, Transport	Developmental protein, Kinase, Serine/threonine-protein kinase, Transferase	Cancer-related genes, Disease variant, Proto-oncogene	Evidence at protein level	Evidence at protein level	Evidence at protein level	Evidence at protein level	Low tissue specificity	Detected in all			Low cell type specificity	Detected in many			Low cell type specificity	Detected in all			Low cancer specificity	Detected in all			Low region specificity	Detected in all			Immune cell enhanced	Detected in all		eosinophil: 24.3	Low lineage specificity	Detected in all			Low cancer specificity	Detected in all			Pituitary gland - Endothelial cells, Spleen - Endothelial cells	Low region specificity	Detected in all
AKT3	PKBG, PRKBG, RAC-gamma	ENSG00000117020	AKT serine/threonine kinase 3	Q9Y243	1	243488233-243851079	Cancer-related genes, Disease related genes, Enzymes, Human disease related genes, Plasma proteins, Potential drug targets, Predicted intracellular proteins, RAS pathway related proteins		Kinase, Serine/threonine-protein kinase, Transferase	Cancer-related genes, Disease variant	Evidence at protein level	Evidence at protein level	Evidence at protein level	Evidence at protein level	Low tissue specificity	Detected in all			Group enriched	Detected in many	6	Astrocytes: 433.8;Excitatory neurons: 730.9;Inhibitory neurons: 492.6;Microglial cells: 395.4;Oligodendrocyte precursor cells: 594.3;Oligodendrocytes: 443.0	Low cell type specificity	Detected in all			Low cancer specificity	Detected in all			Low region specificity	Detected in all			Low immune cell specificity	Detected in some			Low lineage specificity	Detected in many			Low cancer specificity	Detected in all			Adrenal gland - Fibroblasts	Low region specificity	Detected in all
AKTIP	FLJ13258, FTS	ENSG00000166971	AKT interacting protein	Q9H8T0	16	53491040-53504411	Plasma proteins, Predicted intracellular proteins	Apoptosis, Protein transport, Transport			Evidence at protein level	Evidence at transcript level	Evidence at protein level	Evidence at protein level	Low tissue specificity	Detected in all			Cell type enhanced	Detected in all		Late spermatids: 356.1	Low cell type specificity	Detected in all			Low cancer specificity	Detected in all			Low region specificity	Detected in all			Low immune cell specificity	Detected in all			Low lineage specificity	Detected in all			Low cancer specificity	Detected in all			Prostate - Smooth muscle cells, Skeletal muscle - Skeletal myocytes, Testis - Early spermatids, Thyroid gland - Thyroid glandular cells	Low region specificity	Detected in all
ALMS1	KIAA0328	ENSG00000116127	ALMS1 centrosome and basal body associated protein	Q8TCU4	2	73385758-73625166	Disease related genes, Human disease related genes, Predicted intracellular proteins			Ciliopathy, Cone-rod dystrophy, Deafness, Diabetes mellitus, Obesity	Evidence at protein level	Evidence at protein level	Evidence at protein level	Evidence at protein level	Tissue enhanced	Detected in many		testis: 21.5	Cell type enhanced	Detected in all		Early spermatids: 63.4;Excitatory neurons: 62.7;Late spermatids: 88.0;Oligodendrocytes: 86.2	Low cell type specificity	Detected in all			Low cancer specificity	Detected in all			Low region specificity	Detected in all			Not detected in immune cells	Not detected			Not detected	Not detected			Low cancer specificity	Detected in all			Testis - Early spermatids, Testis - Late spermatids	Low region specificity	Detected in many
ALPK1	FLJ22670, KIAA1527, Lak	ENSG00000073331	Alpha kinase 1	Q96QP1	4	112285509-112442621	Disease related genes, Enzymes, Human disease related genes, Potential drug targets, Predicted intracellular proteins, Predicted membrane proteins	Cilium biogenesis/degradation, Immunity, Innate immunity	Kinase, Serine/threonine-protein kinase, Transferase	Disease variant	Evidence at protein level	Evidence at protein level	Evidence at protein level	Evidence at protein level	Low tissue specificity	Detected in all			Cell type enhanced	Detected in many		Microglial cells: 69.8	Cell type enhanced	Detected in many		central nervous system macrophage: 267.3	Low cancer specificity	Detected in all			Low region specificity	Detected in all			Immune cell enhanced	Detected in many		neutrophil: 18.8	Low lineage specificity	Detected in many			Low cancer specificity	Detected in many			Minor Salivary Gland - Minor salivary glandular cells, Spleen - Neutrophils	Low region specificity	Detected in some
ANKRD35	FLJ25124	ENSG00000198483	Ankyrin repeat domain 35	Q8N283	1	145866560-145885866	Predicted intracellular proteins				Evidence at protein level	Evidence at protein level	Evidence at transcript level	Evidence at protein level	Tissue enhanced	Detected in many		skin 1: 58.8	Cell type enhanced	Detected in many		Fibroblasts: 34.9;Leydig cells: 36.8;Muller glia cells: 49.5;Peritubular cells: 53.0;Serous glandular cells: 39.0	Low cell type specificity	Detected in many			Low cancer specificity	Detected in many			Low region specificity	Detected in all			Immune cell enhanced	Detected in some		classical monocyte: 2.1	Low lineage specificity	Detected in many			Cancer enhanced	Detected in some		Leukemia: 1.3	Adrenal gland - Fibroblasts, Heart muscle - Fibroblasts, Kidney - Fibroblasts, Liver - Hepatocytes, Pancreas - Fibroblasts, Skin - Keratinocyte (other), Spleen - Fibroblast_1	Low region specificity	Detected in many
ANKRD65		ENSG00000235098	Ankyrin repeat domain 65	E5RJM6	1	1418420-1421769	Predicted intracellular proteins				Evidence at protein level	Evidence at protein level	Evidence at transcript level	Evidence at protein level	Low tissue specificity	Detected in many			Cell type enhanced	Detected in many		Breast myoepithelial cells: 39.2;Ciliated cells: 49.8;Secretory cells: 44.6	Low cell type specificity	Detected in many			Cancer enhanced	Detected in all		Bladder Urothelial Carcinoma (TCGA): 70.0	Low region specificity	Detected in all			Group enriched	Detected in some	16	myeloid DC: 3.5;plasmacytoid DC: 7.9	Lineage enriched	Detected in single	23	dendritic cells: 7.9	Cancer enhanced	Detected in many		Bladder cancer: 21.1;head and neck cancer: 18.1	Heart muscle - Fibroblasts, Skeletal muscle - Fibroblasts, Spleen - Fibroblast_1	Not detected	Not detected
ANKS6	ANKRD14, FLJ36928, NPHP16, SAMD6	ENSG00000165138	Ankyrin repeat and sterile alpha motif domain containing 6	Q68DC2	9	98731329-98796965	Disease related genes, Human disease related genes, Predicted intracellular proteins			Ciliopathy, Disease variant, Joubert syndrome, Nephronophthisis	Evidence at protein level	Evidence at protein level	Evidence at protein level	Evidence at protein level	Tissue enhanced	Detected in all		brain: 26.6	Cell type enhanced	Detected in many		Alveolar cells type 1: 31.7;Excitatory neurons: 51.1;Inhibitory neurons: 46.6;Oligodendrocytes: 50.5	Low cell type specificity	Detected in all			Low cancer specificity	Detected in all			Low region specificity	Detected in all			Not detected in immune cells	Not detected			Not detected	Not detected			Low cancer specificity	Detected in all			Spleen - B-cells (Spleen)	Low region specificity	Detected in some
ANO10	FLJ10375, MGC47890, SCAR10, TMEM16K	ENSG00000160746	Anoctamin 10	Q9NW15	3	43354859-43691594	Disease related genes, Human disease related genes, Potential drug targets, Predicted intracellular proteins, Predicted membrane proteins, Transporters			Disease variant, Neurodegeneration	Evidence at protein level	Evidence at protein level	Evidence at protein level	Evidence at protein level	Low tissue specificity	Detected in all			Cell type enhanced	Detected in many		Inhibitory neurons: 93.8;Oocytes: 102.9	Low cell type specificity	Detected in all			Low cancer specificity	Detected in all			Low region specificity	Detected in all			Low immune cell specificity	Detected in all			Low lineage specificity	Detected in all			Low cancer specificity	Detected in all			Spleen - Fibroblast_1, Testis - Spermatogonia, Thyroid gland - Thyroid glandular cells	Low region specificity	Detected in all
ANO3	C11orf25, DYT23, GENX-3947, TMEM16C	ENSG00000134343	Anoctamin 3	Q9BYT9	11	26188842-26663289	Disease related genes, Human disease related genes, Potential drug targets, Predicted intracellular proteins, Predicted membrane proteins, Transporters	Lipid transport, Transport		Disease variant, Dystonia	Evidence at protein level	Evidence at transcript level	Evidence at protein level	Evidence at protein level	Group enriched	Detected in some	19	brain: 56.7;epididymis: 56.0	Cell type enriched	Detected in some	5	Excitatory neurons: 195.4	Cell type enhanced	Detected in many		medium spiny neuron: 1104.8	Cancer enhanced	Detected in single		Kidney Renal Clear Cell Carcinoma (TCGA): 1.0	Region enriched	Detected in all	5	basal ganglia: 129.5	Not detected in immune cells	Not detected			Not detected	Not detected			Cancer enriched	Detected in single	12	Rhabdoid: 8.3	Testis - Early spermatids	Region enhanced	Detected in all
ANXA6	ANX6	ENSG00000197043	Annexin A6	P08133	5	151100706-151157815	Plasma proteins, Predicted intracellular proteins, Transporters				Evidence at protein level	Evidence at protein level	Evidence at protein level	Evidence at protein level	Low tissue specificity	Detected in all			Cell type enhanced	Detected in many		Peritubular cells: 211.1;Syncytiotrophoblasts: 229.1	Low cell type specificity	Detected in all			Low cancer specificity	Detected in all			Low region specificity	Detected in all			Low immune cell specificity	Detected in all			Low lineage specificity	Detected in all			Low cancer specificity	Detected in many			Adipose subcutaneous - Adipocytes (Subcutaneous), Adipose visceral - Adipocytes (Visceral), Breast - Adipocytes (Breast), Colon - Smooth muscle cells, Prostate - Smooth muscle cells	Low region specificity	Detected in all
ARFGAP1	ARF1GAP, bA261N11.3, FLJ10767	ENSG00000101199	ADP ribosylation factor GTPase activating protein 1	Q8N6T3	20	63272785-63289790	Plasma proteins, Predicted intracellular proteins	ER-Golgi transport, Protein transport, Transport	GTPase activation		Evidence at protein level	Evidence at protein level	Evidence at protein level	Evidence at protein level	Low tissue specificity	Detected in all			Low cell type specificity	Detected in many			Low cell type specificity	Detected in all			Low cancer specificity	Detected in all			Low region specificity	Detected in all			Low immune cell specificity	Detected in all			Low lineage specificity	Detected in all			Low cancer specificity	Detected in all			Adipose visceral - Adipose progenitor cells	Low region specificity	Detected in all
ARHGAP1	CDC42GAP, p50rhoGAP, RhoGAP	ENSG00000175220	Rho GTPase activating protein 1	Q07960	11	46677080-46700619	Plasma proteins, Predicted intracellular proteins, Predicted membrane proteins		GTPase activation		Evidence at protein level	Evidence at protein level	Evidence at protein level	Evidence at protein level	Low tissue specificity	Detected in all			Low cell type specificity	Detected in many			Cell type enhanced	Detected in all		oligodendrocyte: 147.5	Low cancer specificity	Detected in all			Low region specificity	Detected in all			Low immune cell specificity	Detected in all			Low lineage specificity	Detected in all			Low cancer specificity	Detected in all			Breast - Fibroblasts, Prostate - Smooth muscle cells, Spleen - Fibroblast_1	Low region specificity	Detected in all
ARL13B	ARL2L1, DKFZp761H079, JBTS8	ENSG00000169379	ADP ribosylation factor like GTPase 13B	Q3SXY8	3	93980139-94055678	Disease related genes, Human disease related genes, Predicted intracellular proteins			Ciliopathy, Disease variant, Joubert syndrome	Evidence at protein level	Evidence at protein level	Evidence at protein level	Evidence at protein level	Tissue enhanced	Detected in many		retina: 17.6	Cell type enhanced	Detected in many		Rod photoreceptor cells: 156.4	Cell type enhanced	Detected in all		choroid plexus epithelial cell: 331.2	Low cancer specificity	Detected in many			Low region specificity	Detected in all			Low immune cell specificity	Detected in all			Low lineage specificity	Detected in all			Low cancer specificity	Detected in all			Skeletal muscle - Endothelial cells, Testis - Spermatocytes	Low region specificity	Detected in all
ARL15	ARFRP2, FLJ20051	ENSG00000185305	ADP ribosylation factor like GTPase 15	Q9NXU5	5	53883942-54310582	Predicted intracellular proteins				Evidence at protein level	Evidence at transcript level	Evidence at protein level	Evidence at protein level	Low tissue specificity	Detected in all			Cell type enhanced	Detected in many		Excitatory neurons: 427.4;Inhibitory neurons: 273.2;Microglial cells: 390.1;Oligodendrocyte precursor cells: 173.1	Cell type enhanced	Detected in all		endothelial cell: 3123.7	Low cancer specificity	Detected in all			Low region specificity	Detected in all			Low immune cell specificity	Detected in many			Low lineage specificity	Detected in many			Low cancer specificity	Detected in all			Adipose visceral - Endothelial cells, Prostate - Endothelial cells, Skin - Outer root sheath cells, Spleen - Endothelial cells	Low region specificity	Detected in all
ARL16		ENSG00000214087	ADP ribosylation factor like GTPase 16		17	81681187-81683797	Predicted intracellular proteins				Evidence at transcript level	Evidence at transcript level			Low tissue specificity	Detected in all			Low cell type specificity	Detected in all			Low cell type specificity	Detected in all			Low cancer specificity	Detected in all			Low region specificity	Detected in all			Low immune cell specificity	Detected in all			Low lineage specificity	Detected in all			Low cancer specificity	Detected in all				Low region specificity	Detected in all
ARL2	ARFL2	ENSG00000213465	ADP ribosylation factor like GTPase 2	P36404	11	65014160-65022184	Disease related genes, Predicted intracellular proteins	Cell cycle		Cataract, Disease variant	Evidence at protein level	Evidence at protein level	Evidence at protein level	Evidence at protein level	Low tissue specificity	Detected in all			Cell type enhanced	Detected in many		Late spermatids: 1103.1;Proximal tubular cells: 513.0	Low cell type specificity	Detected in all			Low cancer specificity	Detected in all			Low region specificity	Detected in all			Low immune cell specificity	Detected in all			Low lineage specificity	Detected in all			Low cancer specificity	Detected in all			Minor Salivary Gland - Endothelial cells, Testis - Late spermatids	Low region specificity	Detected in all
ARL2BP	BART, BART1, RP66	ENSG00000102931	ADP ribosylation factor like GTPase 2 binding protein	Q9Y2Y0	16	57245259-57253635	Disease related genes, Human disease related genes, Predicted intracellular proteins			Ciliopathy, Disease variant	Evidence at protein level	Evidence at protein level	Evidence at protein level	Evidence at protein level	Low tissue specificity	Detected in all			Cell type enhanced	Detected in many		Late spermatids: 546.3	Low cell type specificity	Detected in all			Low cancer specificity	Detected in all			Low region specificity	Detected in all			Low immune cell specificity	Detected in all			Low lineage specificity	Detected in all			Low cancer specificity	Detected in all			Adrenal gland - Adrenal cortex cells, Testis - Early spermatids, Testis - Late spermatids	Low region specificity	Detected in all
ARL3	ARFL3	ENSG00000138175	ADP ribosylation factor like GTPase 3	P36405	10	102673731-102714397	Disease related genes, Human disease related genes, Predicted intracellular proteins	Cell cycle, Cell division, Protein transport, Transport		Ciliopathy, Disease variant, Joubert syndrome	Evidence at protein level	Evidence at protein level	Evidence at protein level	Evidence at protein level	Tissue enhanced	Detected in all		retina: 93.4	Cell type enhanced	Detected in all		Cone photoreceptor cells: 343.2	Low cell type specificity	Detected in all			Low cancer specificity	Detected in all			Low region specificity	Detected in all			Low immune cell specificity	Detected in all			Low lineage specificity	Detected in all			Low cancer specificity	Detected in all			Spleen - Fibroblast_1, Testis - Early spermatids, Thyroid gland - Thyroid glandular cells	Low region specificity	Detected in all
ARL6	BBS3, RP55	ENSG00000113966	ADP ribosylation factor like GTPase 6	Q9H0F7	3	97764521-97801229	Disease related genes, Human disease related genes, Predicted intracellular proteins	Cilium biogenesis/degradation, Protein transport, Sensory transduction, Transport, Vision		Bardet-Biedl syndrome, Ciliopathy, Disease variant, Intellectual disability, Obesity, Retinitis pigmentosa	Evidence at protein level	Evidence at protein level	Evidence at protein level	Evidence at protein level	Tissue enhanced	Detected in many		retina: 36.8	Cell type enhanced	Detected in many		Early spermatids: 33.7;Excitatory neurons: 53.2;Inhibitory neurons: 49.4;Rod photoreceptor cells: 54.6;Spermatocytes: 35.1	Low cell type specificity	Detected in all			Cancer enhanced	Detected in many		Kidney Chromophobe (TCGA): 14.4	Low region specificity	Detected in all			Low immune cell specificity	Detected in many			Low lineage specificity	Detected in many			Low cancer specificity	Detected in all			Testis - Early spermatids	Low region specificity	Detected in all
ARPP19	ARPP-16, ARPP-19, ARPP16, ENSAL	ENSG00000128989	CAMP regulated phosphoprotein 19	P56211	15	52547045-52569883	Predicted intracellular proteins	Cell cycle, Cell division, Mitosis	Protein phosphatase inhibitor		Evidence at protein level	Evidence at transcript level	Evidence at protein level	Evidence at protein level	Tissue enhanced	Detected in all		brain: 479.5	Cell type enriched	Detected in all	10	Late spermatids: 3577.4	Cell type enhanced	Detected in all		medium spiny neuron: 368.0	Low cancer specificity	Detected in all			Low region specificity	Detected in all			Low immune cell specificity	Detected in all			Low lineage specificity	Detected in all			Low cancer specificity	Detected in all			Adrenal gland - Adrenal cortex cells, Testis - Spermatogonia	Low region specificity	Detected in all
ATF3		ENSG00000162772	Activating transcription factor 3	P18847	1	212565334-212620777	Predicted intracellular proteins, Transcription factors	Transcription, Transcription regulation	DNA-binding, Repressor	Disease variant	Evidence at protein level	Evidence at protein level	Evidence at protein level	Evidence at protein level	Low tissue specificity	Detected in all			Cell type enhanced	Detected in many		Basal prostatic cells: 1499.4;Glandular and luminal cells: 1529.6;Secretory cells: 1233.6	Group enriched	Detected in all	6	endothelial cell: 116.3;ependymal cell: 62.0;vascular associated smooth muscle cell: 213.9	Low cancer specificity	Detected in all			Low region specificity	Detected in all			Immune cell enhanced	Detected in some		basophil: 6.5;non-classical monocyte: 6.4	Low lineage specificity	Detected in many			Low cancer specificity	Detected in all				Low region specificity	Detected in many
ATG5	APG5, APG5L, ASP, hAPG5	ENSG00000057663	Autophagy related 5	Q9H1Y0	6	106045423-106325791	Disease related genes, Human disease related genes, Potential drug targets, Predicted intracellular proteins, Transporters	Apoptosis, Autophagy, Host-virus interaction, Immunity		Disease variant, Neurodegeneration	Evidence at protein level	Evidence at transcript level	Evidence at protein level	Evidence at protein level	Low tissue specificity	Detected in all			Low cell type specificity	Detected in all			Low cell type specificity	Detected in all			Low cancer specificity	Detected in all			Low region specificity	Detected in all			Low immune cell specificity	Detected in all			Low lineage specificity	Detected in all			Low cancer specificity	Detected in all			Adrenal gland - Adrenal cortex cells, Thyroid gland - Thyroid glandular cells	Low region specificity	Detected in all
ATP2A2	ATP2B, DAR, SERCA2	ENSG00000174437	ATPase sarcoplasmic/endoplasmic reticulum Ca2+ transporting 2	P16615	12	110280756-110351093	Disease related genes, Enzymes, FDA approved drug targets, Human disease related genes, Metabolic proteins, Plasma proteins, Predicted intracellular proteins, Predicted membrane proteins, Transporters	Calcium transport, Ion transport, Transport	Translocase	Disease variant, Epilepsy, FDA approved drug targets	Evidence at protein level	Evidence at protein level	Evidence at protein level	Evidence at protein level	Group enriched	Detected in all	12	heart muscle: 970.6;skeletal muscle: 2756.0;tongue: 2661.9	Group enriched	Detected in all	5	Cardiomyocytes: 1835.3;Skeletal myocytes: 481.1	Low cell type specificity	Detected in all			Low cancer specificity	Detected in all			Low region specificity	Detected in all			Low immune cell specificity	Detected in single			Low lineage specificity	Detected in single			Low cancer specificity	Detected in all			Skeletal muscle - Skeletal myocytes, Testis - Spermatocytes	Low region specificity	Detected in all
ATP2B4	ATP2B2, MXRA1, PMCA4	ENSG00000058668	ATPase plasma membrane Ca2+ transporting 4	P23634	1	203626832-203744081	Enzymes, FDA approved drug targets, Metabolic proteins, Predicted intracellular proteins, Predicted membrane proteins, Transporters	Calcium transport, Ion transport, Transport	Calmodulin-binding, Translocase	FDA approved drug targets	Evidence at protein level	Evidence at protein level	Evidence at protein level	Evidence at protein level	Tissue enhanced	Detected in all		smooth muscle: 170.0	Cell type enhanced	Detected in many		Alveolar cells type 1: 170.1;Oligodendrocyte precursor cells: 186.8	Low cell type specificity	Detected in all			Low cancer specificity	Detected in all			Low region specificity	Detected in all			Low immune cell specificity	Detected in many			Low lineage specificity	Detected in many			Cancer enriched	Detected in all	4	testis cancer: 204.8	Colon - Smooth muscle cells, Prostate - Smooth muscle cells, Skin - Keratinocyte (other)	Low region specificity	Detected in all
ATXN10	ATX10, E46L, FLJ37990, SCA10	ENSG00000130638	Ataxin 10	Q9UBB4	22	45671798-45845307	Disease related genes, Human disease related genes, Predicted intracellular proteins	Cell cycle, Cell division		Ciliopathy, Neurodegeneration, Spinocerebellar ataxia	Evidence at protein level	Evidence at transcript level	Evidence at protein level	Evidence at protein level	Low tissue specificity	Detected in all			Low cell type specificity	Detected in all			Low cell type specificity	Detected in all			Low cancer specificity	Detected in all			Low region specificity	Detected in all			Low immune cell specificity	Detected in all			Low lineage specificity	Detected in all			Low cancer specificity	Detected in all			Adrenal gland - Adrenal cortex cells, Kidney - Fibroblasts, Liver - Hepatocytes, Testis - Spermatogonia, Thyroid gland - Thyroid glandular cells	Low region specificity	Detected in all
AURKA	AIK, ARK1, AurA, BTAK, PPP1R47, STK15, STK6, STK7	ENSG00000087586	Aurora kinase A	O14965	20	56369389-56392337	Cancer-related genes, Enzymes, Human disease related genes, Plasma proteins, Predicted intracellular proteins	Cell cycle, Cell division, Cilium biogenesis/degradation, Mitosis	Kinase, Serine/threonine-protein kinase, Transferase	Cancer-related genes, Proto-oncogene	Evidence at protein level	Evidence at protein level	Evidence at protein level	Evidence at protein level	Tissue enhanced	Detected in many		lymphoid tissue: 21.4;testis: 29.9	Cell type enhanced	Detected in many		Erythroid cells: 54.2;Extravillous trophoblasts: 69.2;Oocytes: 272.8;Spermatocytes: 140.1	Low cell type specificity	Detected in many			Low cancer specificity	Detected in all			Low region specificity	Detected in all			Low immune cell specificity	Detected in many			Low lineage specificity	Detected in all			Low cancer specificity	Detected in all			Lung - Mitotic cells (Lung), Minor Salivary Gland - Mitotic cells (Minor salivary gland), Skin - Mitotic cells (Skin), Spleen - Mitotic cells (Spleen), Testis - Early spermatids	Low region specificity	Detected in all
AXDND1	C1orf125, FLJ32940	ENSG00000162779	Axonemal dynein light chain domain containing 1	Q5T1B0	1	179365720-179554735	Predicted intracellular proteins	Differentiation, Spermatogenesis		Disease variant	Evidence at protein level	Evidence at protein level	Evidence at transcript level	Evidence at protein level	Tissue enriched	Detected in single	33	testis: 15.3	Group enriched	Detected in some	6	Early spermatids: 237.4;Late spermatids: 260.6	Cell type enriched	Detected in many	5	ependymal cell: 90.1	Not detected	Not detected			Low region specificity	Detected in single			Not detected in immune cells	Not detected			Not detected	Not detected			Not detected	Not detected			Kidney - Podocytes, Lung - Respiratory ciliated cells, Skin - Sebaceous gland cells, Stomach - Gastric mucous cells, Testis - Early spermatids	Not detected	Not detected
AXIN1	PPP1R49	ENSG00000103126	Axin 1	O15169	16	287440-352723	Cancer-related genes, Disease related genes, Human disease related genes, Plasma proteins, Predicted intracellular proteins	Apoptosis, Wnt signaling pathway	Developmental protein	Cancer-related genes, Disease variant, Tumor suppressor	Evidence at protein level	Evidence at protein level	Evidence at protein level	Evidence at protein level	Low tissue specificity	Detected in all			Cell type enhanced	Detected in many		NK-cells: 39.0	Low cell type specificity	Detected in all			Low cancer specificity	Detected in all			Low region specificity	Detected in all			Low immune cell specificity	Detected in many			Low lineage specificity	Detected in many			Low cancer specificity	Detected in all				Low region specificity	Detected in all
B9D1	B9, EPPB9, MKS9, MKSR-1	ENSG00000108641	B9 domain containing 1	Q9UPM9	17	19334308-19378193	Disease related genes, Human disease related genes, Predicted intracellular proteins	Cilium biogenesis/degradation		Ciliopathy, Disease variant, Joubert syndrome, Meckel syndrome	Evidence at protein level	Evidence at transcript level	Evidence at protein level	Evidence at protein level	Tissue enhanced	Detected in all		choroid plexus: 89.6	Cell type enhanced	Detected in many		Ciliated cells: 132.0;Early spermatids: 265.0;Late spermatids: 179.0;Spermatocytes: 124.5	Low cell type specificity	Detected in all			Low cancer specificity	Detected in all			Low region specificity	Detected in all			Low immune cell specificity	Detected in some			Low lineage specificity	Detected in many			Low cancer specificity	Detected in all			Lung - Respiratory ciliated cells, Testis - Early spermatids, Testis - Late spermatids, Thyroid gland - Thyroid glandular cells	Low region specificity	Detected in all
B9D2	MGC4093, MKS10, MKSR-2	ENSG00000123810	B9 domain containing 2	Q9BPU9	19	41354417-41364165	Disease related genes, Human disease related genes, Predicted intracellular proteins	Cilium biogenesis/degradation		Ciliopathy, Disease variant, Joubert syndrome, Meckel syndrome	Evidence at protein level	Evidence at protein level	Evidence at protein level	Evidence at protein level	Low tissue specificity	Detected in all			Cell type enhanced	Detected in many		Ciliated cells: 67.3;Distal tubular cells: 43.0	Cell type enhanced	Detected in many		ependymal cell: 9.9	Low cancer specificity	Detected in all			Low region specificity	Detected in all			Immune cell enhanced	Detected in all		neutrophil: 128.0	Low lineage specificity	Detected in all			Low cancer specificity	Detected in all			Spleen - Neutrophils	Low region specificity	Detected in all
BAG3		ENSG00000151929	BAG cochaperone 3	O95817	10	119651380-119677819	Disease related genes, Human disease related genes, Plasma proteins, Predicted intracellular proteins	Apoptosis	Chaperone	Cardiomyopathy, Disease variant, Myofibrillar myopathy	Evidence at protein level	Evidence at protein level	Evidence at protein level	Evidence at protein level	Tissue enhanced	Detected in all		skeletal muscle: 496.2	Cell type enhanced	Detected in many		Basal squamous epithelial cells: 379.6;Cardiomyocytes: 223.0;Skeletal myocytes: 386.4;Squamous epithelial cells: 338.0	Cell type enhanced	Detected in many		astrocyte: 92.5;endothelial cell: 94.6	Low cancer specificity	Detected in all			Low region specificity	Detected in all			Immune cell enhanced	Detected in some		naive CD4 T-cell: 4.1	Lineage enriched	Detected in single	6	T-cells: 4.1	Low cancer specificity	Detected in all				Low region specificity	Detected in all
BBS2	BBS	ENSG00000125124	Bardet-Biedl syndrome 2	Q9BXC9	16	56465640-56582667	Disease related genes, Human disease related genes, Predicted intracellular proteins	Cilium biogenesis/degradation, Protein transport, Sensory transduction, Transport, Vision		Bardet-Biedl syndrome, Ciliopathy, Disease variant, Intellectual disability, Obesity, Retinitis pigmentosa	Evidence at protein level	Evidence at transcript level	Evidence at protein level	Evidence at protein level	Low tissue specificity	Detected in all			Cell type enhanced	Detected in all		Astrocytes: 136.9;Oligodendrocytes: 91.1	Low cell type specificity	Detected in all			Low cancer specificity	Detected in all			Low region specificity	Detected in all			Low immune cell specificity	Detected in many			Low lineage specificity	Detected in all			Low cancer specificity	Detected in all				Low region specificity	Detected in all
BBS5	DKFZp762I194	ENSG00000163093	Bardet-Biedl syndrome 5	Q8N3I7	2	169479480-169506655	Disease related genes, Human disease related genes, Predicted intracellular proteins	Cilium biogenesis/degradation, Protein transport, Sensory transduction, Transport, Vision		Bardet-Biedl syndrome, Ciliopathy, Disease variant, Intellectual disability, Obesity	Evidence at protein level	Evidence at protein level	Evidence at protein level	Evidence at protein level	Low tissue specificity	Detected in all			Cell type enriched	Detected in many	4	Early spermatids: 266.7	Low cell type specificity	Detected in all			Low cancer specificity	Detected in all			Low region specificity	Detected in all			Not detected in immune cells	Not detected			Not detected	Not detected			Low cancer specificity	Detected in all			Lung - Respiratory ciliated cells, Testis - Early spermatids	Low region specificity	Detected in all
BBS9	B1, PTHB1	ENSG00000122507	Bardet-Biedl syndrome 9	Q3SYG4	7	33109557-33877180	Disease related genes, Human disease related genes, Predicted intracellular proteins	Cilium biogenesis/degradation, Protein transport, Sensory transduction, Transport, Vision		Bardet-Biedl syndrome, Ciliopathy, Disease variant, Intellectual disability, Obesity	Evidence at protein level	Evidence at protein level	Evidence at protein level	Evidence at protein level	Low tissue specificity	Detected in all			Cell type enhanced	Detected in many		Astrocytes: 119.2;Excitatory neurons: 157.0;Inhibitory neurons: 152.4;Microglial cells: 254.1;Oligodendrocyte precursor cells: 224.0;Oligodendrocytes: 341.2;Oocytes: 103.7	Cell type enhanced	Detected in all		endothelial cell: 1945.4	Low cancer specificity	Detected in all			Low region specificity	Detected in all			Low immune cell specificity	Detected in many			Low lineage specificity	Detected in all			Low cancer specificity	Detected in all			Testis - Early spermatids, Thyroid gland - Fibroblasts	Low region specificity	Detected in all
BCL3	BCL4, D19S37	ENSG00000069399	BCL3 transcription coactivator	P20749	19	44747705-44760044	Cancer-related genes, Disease related genes, Plasma proteins, Predicted intracellular proteins, Transcription factors	Transcription, Transcription regulation	Activator	Cancer-related genes, Proto-oncogene	Evidence at protein level	Evidence at protein level	Evidence at protein level	Evidence at protein level	Tissue enhanced	Detected in all		liver: 157.8	Cell type enhanced	Detected in many		Basal squamous epithelial cells: 158.7	Cell type enhanced	Detected in many		endothelial cell: 13.5;leukocyte: 9.4	Low cancer specificity	Detected in all			Low region specificity	Detected in all			Group enriched	Detected in many	4	eosinophil: 5.5;neutrophil: 19.8	Lineage enriched	Detected in all	6	granulocytes: 19.8	Low cancer specificity	Detected in all				Not detected	Not detected
BMP2	BMP2A	ENSG00000125845	Bone morphogenetic protein 2	P12643	20	6767686-6780246	Cancer-related genes, Disease related genes, Human disease related genes, Predicted secreted proteins	Chondrogenesis, Differentiation, Osteogenesis	Cytokine, Developmental protein, Growth factor	Cancer-related genes, Disease variant, Dwarfism	Evidence at protein level	Evidence at protein level	Evidence at protein level	Evidence at protein level	Low tissue specificity	Detected in many			Cell type enhanced	Detected in many		Alveolar cells type 1: 157.9;Alveolar cells type 2: 127.0;Basal keratinocytes: 109.2;Distal enterocytes: 80.0;Lymphatic endothelial cells: 116.5;Suprabasal keratinocytes: 71.6	Cell type enhanced	Detected in many		fibroblast: 41.7;oligodendrocyte precursor cell: 19.2	Low cancer specificity	Detected in many			Low region specificity	Detected in all			Not detected in immune cells	Not detected			Not detected	Not detected			Cancer enhanced	Detected in many		cervical cancer: 30.7	Pancreas - Ductal cells	Low region specificity	Detected in many
BRAF	BRAF-1, BRAF1	ENSG00000157764	B-Raf proto-oncogene, serine/threonine kinase	P15056	7	140719327-140924929	Cancer-related genes, Disease related genes, Enzymes, FDA approved drug targets, Human disease related genes, Predicted intracellular proteins, Transporters		Allosteric enzyme, Kinase, Serine/threonine-protein kinase, Transferase	Cancer-related genes, Cardiomyopathy, Deafness, Disease variant, Ectodermal dysplasia, FDA approved drug targets, Intellectual disability, Proto-oncogene	Evidence at protein level	Evidence at protein level	Evidence at protein level	Evidence at protein level	Low tissue specificity	Detected in all			Cell type enhanced	Detected in all		Excitatory neurons: 243.7;Inhibitory neurons: 232.1;Oligodendrocyte precursor cells: 193.4;Oligodendrocytes: 188.6;Syncytiotrophoblasts: 187.7	Low cell type specificity	Detected in all			Low cancer specificity	Detected in all			Low region specificity	Detected in all			Low immune cell specificity	Detected in many			Low lineage specificity	Detected in all			Low cancer specificity	Detected in all			Testis - Early spermatids, Testis - Spermatocytes	Low region specificity	Detected in all
BUB1B	Bub1A, BUBR1, MAD3L, SSK1	ENSG00000156970	BUB1 mitotic checkpoint serine/threonine kinase B	O60566	15	40161023-40221123	Cancer-related genes, Disease related genes, Enzymes, Human disease related genes, Potential drug targets, Predicted intracellular proteins	Apoptosis, Cell cycle, Cell division, Mitosis	Kinase, Serine/threonine-protein kinase, Transferase	Cancer-related genes, Disease variant, Tumor suppressor	Evidence at protein level	Evidence at protein level	Evidence at protein level	Evidence at protein level	Tissue enhanced	Detected in many		bone marrow: 17.6;lymphoid tissue: 34.8;testis: 21.6	Cell type enhanced	Detected in many		Erythroid cells: 18.6;Oocytes: 27.9;Plasma cells: 15.2;Spermatocytes: 80.6;Spermatogonia: 19.7	Cell type enriched	Detected in many	10	choroid plexus epithelial cell: 43.2	Low cancer specificity	Detected in many			Region enriched	Detected in single	17	choroid plexus: 17.0	Immune cell enhanced	Detected in single		naive B-cell: 1.1	Low lineage specificity	Detected in single			Low cancer specificity	Detected in all			Adrenal gland - Mitotic cells (Adrenal gland), Colon - Mitotic cells (Colon), Heart muscle - Mitotic cells (Heart), Lung - Mitotic cells (Lung), Minor Salivary Gland - Mitotic cells (Minor salivary gland), Skin - Mitotic cells (Skin), Spleen - Mitotic cells (Spleen), Stomach - Mitotic cells (Stomach), Testis - Spermatocytes, Thyroid gland - Mitotic cells (Thyroid)	Low region specificity	Detected in many
C21orf58		ENSG00000160298	Chromosome 21 open reading frame 58	P58505	21	46300181-46323875	Predicted intracellular proteins				Evidence at protein level	Evidence at transcript level	Evidence at transcript level	Evidence at protein level	Tissue enhanced	Detected in many		fallopian tube: 25.6;pituitary gland: 20.2	Cell type enhanced	Detected in many		Ciliated cells: 128.1;Enteroendocrine cells: 38.1;Erythroid cells: 70.0;Spermatocytes: 77.7	Cell type enriched	Detected in all	4	ependymal cell: 75.8	Low cancer specificity	Detected in many			Low region specificity	Detected in all			Immune cell enriched	Detected in some	4	basophil: 4.4	Lineage enriched	Detected in many	4	granulocytes: 4.4	Low cancer specificity	Detected in all			Lung - Respiratory ciliated cells, Pancreas - Alpha cells, Pancreas - Beta cells, Spleen - Mitotic cells (Spleen)	Not detected	Not detected
C2CD3	DKFZP586P0123	ENSG00000168014	C2 domain containing 3 centriole elongation regulator	Q4AC94	11	74012718-74171210	Disease related genes, Human disease related genes, Predicted intracellular proteins	Cilium biogenesis/degradation		Ciliopathy, Disease variant, Intellectual disability	Evidence at protein level	Evidence at protein level	Evidence at protein level	Evidence at protein level	Low tissue specificity	Detected in all			Cell type enhanced	Detected in all		Excitatory neurons: 55.4	Low cell type specificity	Detected in all			Cancer enhanced	Detected in all		Testicular Germ Cell Tumor (TCGA): 93.0	Low region specificity	Detected in all			Immune cell enhanced	Detected in all		basophil: 21.8	Low lineage specificity	Detected in all			Low cancer specificity	Detected in all			Liver - Vascular Endothelial cells, Testis - Early spermatids, Testis - Late spermatids	Low region specificity	Detected in all
C2CD4C	FAM148C, KIAA1957, NLF3	ENSG00000183186	C2 calcium dependent domain containing 4C	Q8TF44	19	405445-409147	Predicted intracellular proteins				Evidence at protein level	Evidence at transcript level	Evidence at protein level	Evidence at protein level	Tissue enriched	Detected in many	6	brain: 27.2	Cell type enhanced	Detected in some		Adipocytes: 12.4;Endothelial cells: 3.2;Excitatory neurons: 3.5;Inhibitory neurons: 3.0;Lymphatic endothelial cells: 4.6;Rod photoreceptor cells: 6.4	Cell type enhanced	Detected in many		upper-layer intratelencephalic: 19.8	Cancer enhanced	Detected in some		Testicular Germ Cell Tumor (TCGA): 8.7	Low region specificity	Detected in many			Not detected in immune cells	Not detected			Not detected	Not detected			Low cancer specificity	Detected in many				Low region specificity	Detected in many
C7orf57		ENSG00000164746	Chromosome 7 open reading frame 57	Q8NEG2	7	48035511-48061304	Predicted intracellular proteins				Evidence at protein level	Evidence at protein level	Evidence at transcript level	Evidence at protein level	Tissue enhanced	Detected in some		choroid plexus: 7.6;fallopian tube: 13.4	Cell type enriched	Detected in some	5	Ciliated cells: 76.0	Cell type enriched	Detected in many	4	ependymal cell: 162.7	Cancer enhanced	Detected in many		Kidney Chromophobe (TCGA): 4.9	Low region specificity	Detected in many			Not detected in immune cells	Not detected			Not detected	Not detected			Low cancer specificity	Detected in some			Kidney - Endothelial cells, Lung - Respiratory ciliated cells, Testis - Early spermatids	Low region specificity	Detected in many
CABCOCO1	bA63A2.1, C10orf107, Em:AC022398.2, MGC44593	ENSG00000183346	Ciliary associated calcium binding coiled-coil 1	Q8IVU9	10	61662929-61766766	Predicted intracellular proteins				Evidence at protein level	Evidence at protein level	Evidence at protein level	Evidence at protein level	Tissue enhanced	Detected in many		brain: 13.3;fallopian tube: 25.8;testis: 15.0	Cell type enhanced	Detected in many		Ciliated cells: 100.9;Early spermatids: 52.2;Ionocytes: 24.7;Oligodendrocytes: 23.9;Spermatocytes: 26.9	Cell type enriched	Detected in many	6	ependymal cell: 445.5	Low cancer specificity	Detected in many			Low region specificity	Detected in all			Not detected in immune cells	Not detected			Not detected	Not detected			Low cancer specificity	Detected in some			Lung - Respiratory ciliated cells, Testis - Early spermatids	Low region specificity	Detected in all
CACNA1C	CACH2, CACN2, CACNL1A1, Cav1.2, CCHL1A1, LQT8, TS	ENSG00000151067	Calcium voltage-gated channel subunit alpha1 C	Q13936	12	1970772-2697950	Disease related genes, FDA approved drug targets, Human disease related genes, Predicted membrane proteins, Transporters, Voltage-gated ion channels	Calcium transport, Host-virus interaction, Ion transport, Transport	Calcium channel, Calmodulin-binding, Ion channel, Voltage-gated channel	Autism, Autism spectrum disorder, Brugada syndrome, Disease variant, Epilepsy, FDA approved drug targets, Intellectual disability, Long QT syndrome	Evidence at protein level	Evidence at protein level	Evidence at protein level	Evidence at protein level	Tissue enhanced	Detected in many		endometrium 1: 19.5;heart muscle: 20.2;intestine: 28.4	Group enriched	Detected in many	4	Excitatory neurons: 586.4;Inhibitory neurons: 456.6;Oligodendrocyte precursor cells: 182.5	Low cell type specificity	Detected in all			Low cancer specificity	Detected in some			Low region specificity	Detected in all			Not detected in immune cells	Not detected			Not detected	Not detected			Cancer enhanced	Detected in some		Brain cancer: 3.9	Prostate - Smooth muscle cells, Testis - Early spermatids, Testis - Late spermatids, Thyroid gland - Smooth muscle cells	Low region specificity	Detected in all
CAMK1D	CKLiK	ENSG00000183049	Calcium/calmodulin dependent protein kinase ID	Q8IU85	10	12349547-12835545	Enzymes, Plasma proteins, Predicted membrane proteins	Inflammatory response, Neurogenesis	Allosteric enzyme, Calmodulin-binding, Kinase, Serine/threonine-protein kinase, Transferase		Evidence at protein level	Evidence at transcript level	Evidence at protein level	Evidence at protein level	Tissue enhanced	Detected in many		brain: 40.6;retina: 56.0	Cell type enhanced	Detected in many		Cone photoreceptor cells: 331.3;Excitatory neurons: 403.0;Inhibitory neurons: 224.4;Microglial cells: 161.0;Rod photoreceptor cells: 220.2	Low cell type specificity	Detected in all			Low cancer specificity	Detected in all			Low region specificity	Detected in all			Immune cell enhanced	Detected in all		eosinophil: 64.4	Lineage enriched	Detected in all	5	granulocytes: 64.4	Low cancer specificity	Detected in many			Spleen - B-cells (Spleen)	Low region specificity	Detected in all
CAMK1G	CLICKIII, dJ272L16.1, VWS1	ENSG00000008118	Calcium/calmodulin dependent protein kinase IG	Q96NX5	1	209583714-209613939	Enzymes, Plasma proteins, Predicted intracellular proteins, Predicted membrane proteins		Allosteric enzyme, Calmodulin-binding, Kinase, Serine/threonine-protein kinase, Transferase		Evidence at protein level	Evidence at transcript level	Evidence at protein level	Evidence at protein level	Tissue enhanced	Detected in many		brain: 49.8;ovary: 26.4	Group enriched	Detected in some	4	Excitatory neurons: 19.3;Granulosa cells: 7.5;Inhibitory neurons: 14.9;Ovarian stromal cells: 9.7;Peritubular cells: 6.4	Low cell type specificity	Detected in many			Low cancer specificity	Detected in some			Low region specificity	Detected in all			Not detected in immune cells	Not detected			Not detected	Not detected			Group enriched	Detected in some	5	Bone cancer: 8.2;Sarcoma: 2.3;thyroid cancer: 2.3		Low region specificity	Detected in all
CAMK2A	CAMKA, CaMKIIalpha, CaMKIINalpha, KIAA0968	ENSG00000070808	Calcium/calmodulin dependent protein kinase II alpha	Q9UQM7	5	150219491-150290093	Disease related genes, Enzymes, Human disease related genes, Plasma proteins, Potential drug targets, Predicted intracellular proteins, Predicted membrane proteins		Calmodulin-binding, Kinase, Serine/threonine-protein kinase, Transferase	Disease variant, Intellectual disability	Evidence at protein level	Evidence at protein level	Evidence at protein level	Evidence at protein level	Group enriched	Detected in many	5	brain: 438.1;skeletal muscle: 158.1	Cell type enriched	Detected in some	4	Excitatory neurons: 237.9	Low cell type specificity	Detected in all			Cancer enriched	Detected in single	15	Glioblastoma Multiforme (TCGA): 10.2	Group enriched	Detected in all	5	amygdala: 795.7;basal ganglia: 786.5;cerebral cortex: 1817.1;hippocampal formation: 1345.8;white matter: 633.5	Not detected in immune cells	Not detected			Not detected	Not detected			Cancer enhanced	Detected in some		Neuroblastoma: 1.3	Colon - Enteric glia cells, Heart muscle - Cardiomyocytes	Low region specificity	Detected in all
CAMK2B	CAM2, CAMK2, CAMKB, CaMKIIbeta	ENSG00000058404	Calcium/calmodulin dependent protein kinase II beta	Q13554	7	44210019-44334577	Disease related genes, Enzymes, Human disease related genes, Plasma proteins, Potential drug targets, Predicted intracellular proteins, Predicted membrane proteins	Differentiation, Neurogenesis	Actin-binding, Calmodulin-binding, Developmental protein, Kinase, Serine/threonine-protein kinase, Transferase	Intellectual disability	Evidence at protein level	Evidence at protein level	Evidence at protein level	Evidence at protein level	Group enriched	Detected in many	6	brain: 107.3;heart muscle: 64.3;skeletal muscle: 115.6;tongue: 59.1	Cell type enriched	Detected in many	4	Bipolar cells: 697.3	Low cell type specificity	Detected in all			Cancer enhanced	Detected in many		Glioblastoma Multiforme (TCGA): 18.0;Thyroid Carcinoma (TCGA): 15.1	Low region specificity	Detected in all			Not detected in immune cells	Not detected			Not detected	Not detected			Cancer enhanced	Detected in many		prostate cancer: 10.1	Adrenal gland - Adrenal medulla cells, Colon - Colon enteroendocrine cells, Heart muscle - Cardiomyocytes, Pancreas - Alpha cells, Pancreas - Beta cells, Pituitary gland - Corticotropes, Skin - Sebaceous gland cells, Stomach - Gastric enteroendocrine cells	Low region specificity	Detected in all
CAMK2D	CAMKD	ENSG00000145349	Calcium/calmodulin dependent protein kinase II delta	Q13557	4	113418054-113761927	Enzymes, Plasma proteins, Predicted intracellular proteins, Predicted membrane proteins		Calmodulin-binding, Kinase, Serine/threonine-protein kinase, Transferase		Evidence at protein level	Evidence at protein level	Evidence at protein level	Evidence at protein level	Tissue enhanced	Detected in all		heart muscle: 127.3	Cell type enhanced	Detected in many		Cardiomyocytes: 342.0;Inhibitory neurons: 192.1;Microglial cells: 178.9;Oligodendrocyte precursor cells: 190.6	Low cell type specificity	Detected in all			Low cancer specificity	Detected in all			Low region specificity	Detected in all			Low immune cell specificity	Detected in many			Low lineage specificity	Detected in many			Low cancer specificity	Detected in all
CAMK2G	CAMKG	ENSG00000148660	Calcium/calmodulin dependent protein kinase II gamma	Q13555	10	73812501-73874591	Disease related genes, Enzymes, Human disease related genes, Plasma proteins, Potential drug targets, Predicted intracellular proteins, Predicted membrane proteins, Transporters	Differentiation, Neurogenesis	Calmodulin-binding, Developmental protein, Kinase, Serine/threonine-protein kinase, Transferase	Intellectual disability	Evidence at protein level	Evidence at protein level	Evidence at protein level	Evidence at protein level	Tissue enhanced	Detected in all		skeletal muscle: 147.2	Cell type enhanced	Detected in many		Astrocytes: 389.5;Cytotrophoblasts: 173.3	Cell type enhanced	Detected in all		astrocyte: 808.7	Low cancer specificity	Detected in all			Low region specificity	Detected in all			Immune cell enhanced	Detected in all		eosinophil: 128.4	Low lineage specificity	Detected in all			Low cancer specificity	Detected in all			Adipose subcutaneous - Smooth muscle cells, Prostate - Smooth muscle cells, Skeletal muscle - Skeletal myocytes, Thyroid gland - Fibroblasts	Low region specificity	Detected in all
CAMK2N1	CaMKIINalpha	ENSG00000162545	Calcium/calmodulin dependent protein kinase II inhibitor 1	Q7Z7J9	1	20482391-20486210	Predicted intracellular proteins		Protein kinase inhibitor		Evidence at protein level	Evidence at transcript level	No human protein/transcript evidence	Evidence at protein level	Tissue enriched	Detected in many	7	brain: 595.3	Cell type enhanced	Detected in many		Distal enterocytes: 518.1;Distal tubular cells: 310.4;Intestinal goblet cells: 457.4;Paneth cells: 279.3;Proximal tubular cells: 482.2	Low cell type specificity	Detected in all			Low cancer specificity	Detected in all			Low region specificity	Detected in all			Immune cell enhanced	Detected in some		gdT-cell: 1.6;MAIT T-cell: 1.1	Lineage enhanced	Detected in single		T-cells: 1.6	Low cancer specificity	Detected in many			Heart muscle - Fibroblasts, Lung - Fibroblast_1, Skin - Eccrine sweat gland cells	Low region specificity	Detected in all
CAMK2N2	CaM-KIIN	ENSG00000163888	Calcium/calmodulin dependent protein kinase II inhibitor 2	Q96S95	3	184259213-184261553	Predicted intracellular proteins		Protein kinase inhibitor		Evidence at protein level	Evidence at transcript level	Evidence at transcript level	Evidence at protein level	Tissue enhanced	Detected in some		brain: 95.6;pancreas: 32.7;pituitary gland: 38.6	Group enriched	Detected in some	7	Horizontal cells: 85.0;Inhibitory neurons: 43.4	Low cell type specificity	Detected in all			Cancer enhanced	Detected in many		Glioblastoma Multiforme (TCGA): 18.1	Low region specificity	Detected in all			Not detected in immune cells	Not detected			Not detected	Not detected			Low cancer specificity	Detected in many			Colon - Colon enteroendocrine cells	Low region specificity	Detected in all
CAMTA1	KIAA0833	ENSG00000171735	Calmodulin binding transcription activator 1	Q9Y6Y1	1	6785454-7769706	Cancer-related genes, Disease related genes, Human disease related genes, Predicted intracellular proteins	Transcription, Transcription regulation	Activator	Cancer-related genes, Intellectual disability	Evidence at protein level	Evidence at protein level	Evidence at protein level	Evidence at protein level	Low tissue specificity	Detected in all			Cell type enhanced	Detected in all		Cardiomyocytes: 785.5;Proximal tubular cells: 670.5	Low cell type specificity	Detected in all			Low cancer specificity	Detected in all			Low region specificity	Detected in all			Low immune cell specificity	Detected in all			Low lineage specificity	Detected in all			Low cancer specificity	Detected in all			Spleen - Endothelial cells	Low region specificity	Detected in all
CAPSL	MGC26610	ENSG00000152611	Calcyphosine like	Q8WWF8	5	35904288-35938779	Predicted intracellular proteins				Evidence at protein level	Evidence at protein level	Evidence at transcript level	Evidence at protein level	Group enriched	Detected in many	7	choroid plexus: 88.5;fallopian tube: 107.2	Group enriched	Detected in some	4	Ciliated cells: 567.2;Early spermatids: 165.8;Ionocytes: 177.4;Late spermatids: 161.8	Group enriched	Detected in some	9	choroid plexus epithelial cell: 60.5;ependymal cell: 199.3	Cancer enriched	Detected in many	4	Uterine Corpus Endometrial Carcinoma (TCGA): 20.6	Region enhanced	Detected in all		choroid plexus: 52.0	Not detected in immune cells	Not detected			Not detected	Not detected			Cancer enhanced	Detected in some		Adrenocortical cancer: 2.9;Leukemia: 2.2	Lung - Respiratory ciliated cells, Skin - Inner root sheath cells, Testis - Early spermatids, Testis - Late spermatids	Low region specificity	Detected in all
CASP2	ICH1, MGC2181, NEDD2, PPP1R57	ENSG00000106144	Caspase 2	P42575	7	143288215-143307696	Cancer-related genes, Enzymes, Plasma proteins, Predicted intracellular proteins	Apoptosis	Hydrolase, Protease, Thiol protease	Cancer-related genes, Disease variant, Intellectual disability, Lissencephaly	Evidence at protein level	Evidence at transcript level	Evidence at protein level	Evidence at protein level	Low tissue specificity	Detected in all			Cell type enhanced	Detected in all		Late spermatids: 55.2	Low cell type specificity	Detected in all			Low cancer specificity	Detected in all			Low region specificity	Detected in all			Low immune cell specificity	Detected in all			Low lineage specificity	Detected in all			Low cancer specificity	Detected in all			Testis - Spermatocytes, Testis - Spermatogonia	Low region specificity	Detected in all
CATSPER2		ENSG00000166762	Cation channel sperm associated 2	Q96P56	15	43628503-43668118	Disease related genes, Human disease related genes, Plasma proteins, Potential drug targets, Predicted intracellular proteins, Predicted membrane proteins, Transporters, Voltage-gated ion channels	Calcium transport, Differentiation, Ion transport, Spermatogenesis, Transport	Calcium channel, Developmental protein, Ion channel, Voltage-gated channel		Evidence at protein level	Evidence at protein level	Evidence at protein level	Evidence at protein level	Tissue enhanced	Detected in many		retina: 22.4;testis: 15.5	Cell type enhanced	Detected in many		Cone photoreceptor cells: 81.6;Early spermatids: 75.3;Horizontal cells: 40.9;Rod photoreceptor cells: 171.5;Spermatocytes: 65.1	Low cell type specificity	Detected in all			Low cancer specificity	Detected in many			Low region specificity	Detected in all			Low immune cell specificity	Detected in single			Low lineage specificity	Detected in single			Low cancer specificity	Detected in all			Testis - Early spermatids	Low region specificity	Detected in many
CATSPERZ	C11orf20, DKFZP566E164, TEX40	ENSG00000219435	Catsper channel auxiliary subunit zeta	Q9NTU4	11	64300358-64304770	Predicted intracellular proteins, Transporters	Differentiation, Spermatogenesis			Evidence at protein level	Evidence at transcript level	Evidence at transcript level	Evidence at protein level	Tissue enriched	Detected in some	168	testis: 570.0	Group enriched	Detected in some	6	Early spermatids: 324.7;Late spermatids: 709.3	Low cell type specificity	Detected in many			Low cancer specificity	Detected in some			Low region specificity	Detected in all			Not detected in immune cells	Not detected			Not detected	Not detected			Low cancer specificity	Detected in many			Testis - Early spermatids, Testis - Late spermatids	Low region specificity	Detected in many
CC2D1A	Aki-1, FLJ20241, Freud-1, Lgd2, MRT3, TAPE	ENSG00000132024	Coiled-coil and C2 domain containing 1A	Q6P1N0	19	13906201-13930879	Disease related genes, Human disease related genes, Predicted intracellular proteins	Transcription, Transcription regulation	DNA-binding, Repressor	Intellectual disability	Evidence at protein level	Evidence at protein level	Evidence at protein level	Evidence at protein level	Low tissue specificity	Detected in all			Cell type enhanced	Detected in many		Distal enterocytes: 99.3;Rod photoreceptor cells: 102.4	Low cell type specificity	Detected in all			Low cancer specificity	Detected in all			Low region specificity	Detected in all			Not detected in immune cells	Not detected			Not detected	Not detected			Low cancer specificity	Detected in all				Low region specificity	Detected in all
CCDC13	FLJ25467	ENSG00000244607	Coiled-coil domain containing 13	Q8IYE1	3	42705756-42773253	Predicted intracellular proteins	Cilium biogenesis/degradation			Evidence at protein level	Evidence at protein level	Evidence at protein level	Evidence at protein level	Tissue enhanced	Detected in some		fallopian tube: 2.8;retina: 4.2;testis: 5.7	Cell type enhanced	Detected in some		Astrocytes: 6.8;Ciliated cells: 10.1;Distal tubular cells: 15.4;Early spermatids: 6.7;Excitatory neurons: 5.8;Spermatocytes: 5.8	Group enriched	Detected in many	5	choroid plexus epithelial cell: 19.4;ependymal cell: 71.7	Not detected	Not detected			Low region specificity	Detected in all			Not detected in immune cells	Not detected			Not detected	Not detected			Not detected	Not detected			Lung - Respiratory ciliated cells, Testis - Early spermatids, Testis - Late spermatids	Low region specificity	Detected in all
CCDC14	DKFZp434L1050, FLJ12892	ENSG00000175455	Coiled-coil domain containing 14	Q49A88	3	123897305-123961408	Predicted intracellular proteins				Evidence at protein level	Evidence at protein level	Evidence at protein level	Evidence at protein level	Low tissue specificity	Detected in all			Low cell type specificity	Detected in all			Low cell type specificity	Detected in all			Low cancer specificity	Detected in all			Low region specificity	Detected in all			Low immune cell specificity	Detected in many			Low lineage specificity	Detected in many			Low cancer specificity	Detected in all			Testis - Spermatocytes	Low region specificity	Detected in many
CCDC183	bA216L13.7, KIAA1984, MGC15438	ENSG00000213213	Coiled-coil domain containing 183	Q5T5S1	9	136796338-136807741	Predicted intracellular proteins				Evidence at protein level	Evidence at transcript level	Evidence at transcript level	Evidence at protein level	Tissue enriched	Detected in some	12	testis: 21.4	Group enriched	Detected in many	8	Early spermatids: 221.1;Late spermatids: 135.5	Not detected	Not detected			Low cancer specificity	Detected in single			Low region specificity	Detected in all			Immune cell enriched	Detected in single	5	plasmacytoid DC: 1.4	Lineage enriched	Detected in single	5	dendritic cells: 1.4	Low cancer specificity	Detected in some			Testis - Early spermatids, Testis - Late spermatids
CCDC39	CFAP59, CILD14, DKFZp434A128, FAP59	ENSG00000284862	Coiled-coil domain containing 39	Q9UFE4	3	180602858-180684942	Disease related genes, Human disease related genes, Predicted intracellular proteins			Ciliopathy, Kartagener syndrome, Primary ciliary dyskinesia	Evidence at protein level	Evidence at protein level	Evidence at transcript level	Evidence at protein level	Tissue enhanced	Detected in many		lymphoid tissue: 21.1;retina: 21.2	Cell type enhanced	Detected in some		Ciliated cells: 26.9;Cone photoreceptor cells: 10.2;Early spermatids: 16.4;Excitatory neurons: 21.1;Inhibitory neurons: 6.6;Spermatocytes: 7.1	Cell type enhanced	Detected in all		ependymal cell: 50.7	Low cancer specificity	Detected in many			Low region specificity	Detected in all			Not detected in immune cells	Not detected			Not detected	Not detected			Low cancer specificity	Detected in all				Low region specificity	Detected in all
CCDC40	CFAP172, CILD15, FAP172, FLJ20753, FLJ32021, KIAA1640	ENSG00000141519	Coiled-coil domain containing 40	Q4G0X9	17	80036632-80100613	Disease related genes, Human disease related genes, Predicted intracellular proteins			Ciliopathy, Kartagener syndrome, Primary ciliary dyskinesia	Evidence at protein level	Evidence at protein level	Evidence at protein level	Evidence at protein level	Tissue enhanced	Detected in many		choroid plexus: 14.1;fallopian tube: 14.3	Cell type enhanced	Detected in many		Ciliated cells: 74.9;Rod photoreceptor cells: 31.5	Group enriched	Detected in many	5	choroid plexus epithelial cell: 181.2;ependymal cell: 301.8	Low cancer specificity	Detected in many			Low region specificity	Detected in all			Not detected in immune cells	Not detected			Not detected	Not detected			Low cancer specificity	Detected in many			Lung - Respiratory ciliated cells, Testis - Early spermatids	Low region specificity	Detected in many
CCDC50	C3orf6, DFNA44, Ymer	ENSG00000152492	Coiled-coil domain containing 50	Q8IVM0	3	191329085-191398659	Disease related genes, Human disease related genes, Predicted intracellular proteins			Deafness, Non-syndromic deafness	Evidence at protein level	Evidence at protein level	Evidence at protein level	Evidence at protein level	Low tissue specificity	Detected in all			Cell type enhanced	Detected in all		dendritic cells: 606.8;Oligodendrocyte precursor cells: 342.9	Cell type enhanced	Detected in all		oligodendrocyte precursor cell: 498.5	Low cancer specificity	Detected in all			Low region specificity	Detected in all			Immune cell enriched	Detected in many	5	plasmacytoid DC: 631.6	Lineage enriched	Detected in all	5	dendritic cells: 631.6	Low cancer specificity	Detected in all			Skin - Endothelial cells, Spleen - Endothelial cells	Low region specificity	Detected in all
CCDC65	CFAP250, CILD27, DRC2, FAP250, FLJ35732, NYD-SP28	ENSG00000139537	Coiled-coil domain containing 65	Q8IXS2	12	48904110-48931840	Disease related genes, Human disease related genes, Predicted intracellular proteins			Ciliopathy, Kartagener syndrome, Primary ciliary dyskinesia	Evidence at protein level	Evidence at protein level	Evidence at protein level	Evidence at protein level	Tissue enhanced	Detected in many		choroid plexus: 18.9;fallopian tube: 25.8;testis: 36.2	Group enriched	Detected in many	6	Ciliated cells: 101.8;Early spermatids: 213.0;Spermatocytes: 70.4	Low cell type specificity	Detected in all			Low cancer specificity	Detected in many			Low region specificity	Detected in all			Group enriched	Detected in many	8	gdT-cell: 8.8;MAIT T-cell: 9.1;memory CD4 T-cell: 7.5;memory CD8 T-cell: 7.3;naive CD4 T-cell: 4.6;naive CD8 T-cell: 6.2;T-reg: 4.9	Lineage enriched	Detected in single	11	T-cells: 9.1	Low cancer specificity	Detected in many			Lung - Respiratory ciliated cells, Testis - Early spermatids	Low region specificity	Detected in all
CCDC66	DKFZp686C0433	ENSG00000180376	Coiled-coil domain containing 66	A2RUB6	3	56557161-56621837	Predicted intracellular proteins	Cilium biogenesis/degradation			Evidence at protein level	Evidence at protein level	Evidence at protein level	Evidence at protein level	Low tissue specificity	Detected in all			Cell type enhanced	Detected in all		Early spermatids: 219.9	Low cell type specificity	Detected in all			Low cancer specificity	Detected in many			Low region specificity	Detected in all			Low immune cell specificity	Detected in many			Low lineage specificity	Detected in all			Low cancer specificity	Detected in all			Testis - Early spermatids, Testis - Late spermatids	Low region specificity	Detected in all
CCDC74A	FLJ40345	ENSG00000163040	Coiled-coil domain containing 74A	Q96AQ1	2	131527675-131533666	Predicted intracellular proteins				Evidence at protein level	Evidence at transcript level	Evidence at protein level	Evidence at protein level	Tissue enhanced	Detected in many		choroid plexus: 64.5;testis: 71.5	Cell type enhanced	Detected in many		Ciliated cells: 144.4;Early spermatids: 382.7;Late spermatids: 331.4;Spermatocytes: 135.4	Cell type enhanced	Detected in many		ependymal cell: 45.4	Cancer enhanced	Detected in many		Breast Invasive Carcinoma (TCGA): 48.9	Low region specificity	Detected in all			Not detected in immune cells	Not detected			Not detected	Not detected			Low cancer specificity	Detected in all			Breast - Breast glandular cells, Lung - Respiratory ciliated cells, Testis - Early spermatids, Thyroid gland - Fibroblasts
CCDC74B	DKFZp434E2321	ENSG00000152076	Coiled-coil domain containing 74B	Q96LY2	2	130139287-130145134	Predicted intracellular proteins				Evidence at protein level	Evidence at transcript level	Evidence at protein level	Evidence at protein level	Tissue enhanced	Detected in many		testis: 53.8	Cell type enhanced	Detected in many		Ciliated cells: 65.4;Early spermatids: 308.3;Late spermatids: 166.6;Spermatocytes: 123.4	Cell type enriched	Detected in many	7	ependymal cell: 51.3	Low cancer specificity	Detected in many			Low region specificity	Detected in all			Not detected in immune cells	Not detected			Not detected	Not detected			Cancer enhanced	Detected in many		prostate cancer: 19.8	Lung - Respiratory ciliated cells, Testis - Early spermatids
CCDC81	FLJ16339, FLJ23514	ENSG00000149201	Coiled-coil domain containing 81	Q6ZN84	11	86374736-86423109	Predicted intracellular proteins				Evidence at protein level	Evidence at transcript level	Evidence at protein level	Evidence at protein level	Tissue enhanced	Detected in some		choroid plexus: 16.3;fallopian tube: 26.5	Group enriched	Detected in some	8	Ciliated cells: 45.5;Early spermatids: 50.9;Extravillous trophoblasts: 36.9	Cell type enriched	Detected in all	4	ependymal cell: 223.7	Cancer enhanced	Detected in single		Testicular Germ Cell Tumor (TCGA): 1.8	Low region specificity	Detected in all			Not detected in immune cells	Not detected			Not detected	Not detected			Cancer enhanced	Detected in some		testis cancer: 1.9	Adipose subcutaneous - Smooth muscle cells, Lung - Respiratory ciliated cells, Testis - Early spermatids	Low region specificity	Detected in many
CCDC88A	APE, FLJ10392, GIV, GRDN, HkRP1, KIAA1212	ENSG00000115355	Coiled-coil domain containing 88A	Q3V6T2	2	55287842-55419895	Disease related genes, Human disease related genes, Predicted intracellular proteins	Cilium biogenesis/degradation, Neurogenesis	Guanine-nucleotide releasing factor	Epilepsy, Intellectual disability, Neurodegeneration	Evidence at protein level	Evidence at protein level	Evidence at protein level	Evidence at protein level	Tissue enhanced	Detected in all		brain: 58.6;testis: 45.5	Cell type enhanced	Detected in many		Early spermatids: 631.9;Late spermatids: 769.7;Oligodendrocytes: 702.6;Spermatocytes: 463.1	Low cell type specificity	Detected in all			Cancer enhanced	Detected in all		Glioblastoma Multiforme (TCGA): 28.0	Low region specificity	Detected in all			Group enriched	Detected in many	5	basophil: 6.1;classical monocyte: 7.1;intermediate monocyte: 7.0;myeloid DC: 11.3;non-classical monocyte: 6.8;plasmacytoid DC: 23.7	Group enriched	Detected in all	6	dendritic cells: 23.7;granulocytes: 6.1;monocytes: 7.1	Low cancer specificity	Detected in all			Testis - Early spermatids	Low region specificity	Detected in all
CDC42EP5	Borg3, CEP5	ENSG00000167617	CDC42 effector protein 5	Q6NZY7	19	54465026-54473296	Predicted intracellular proteins	Cell shape			Evidence at protein level	Evidence at transcript level	Evidence at transcript level	Evidence at protein level	Tissue enhanced	Detected in many		intestine: 81.5;prostate: 58.6	Cell type enhanced	Detected in many		Club cells: 167.0;Distal enterocytes: 448.8;Intestinal goblet cells: 411.7;Paneth cells: 187.5;Prostatic glandular cells: 232.8;Serous glandular cells: 156.5	Cell type enhanced	Detected in many		endothelial cell: 20.2;fibroblast: 32.6;pericyte: 13.2	Low cancer specificity	Detected in many			Low region specificity	Detected in many			Not detected in immune cells	Not detected			Not detected	Not detected			Low cancer specificity	Detected in many			Minor Salivary Gland - Minor salivary glandular cells, Pituitary gland - Fibroblasts, Spleen - Fibroblast_1	Low region specificity	Detected in many
CDK5RAP2	C48, CEP215, FLJ10867, MCPH3	ENSG00000136861	CDK5 regulatory subunit associated protein 2	Q96SN8	9	120388875-120580170	Disease related genes, Human disease related genes, Plasma proteins, Predicted intracellular proteins		Calmodulin-binding	Intellectual disability, Primary microcephaly	Evidence at protein level	Evidence at protein level	Evidence at protein level	Evidence at protein level	Low tissue specificity	Detected in all			Cell type enhanced	Detected in all		Oligodendrocytes: 138.4	Low cell type specificity	Detected in all			Low cancer specificity	Detected in all			Low region specificity	Detected in all			Low immune cell specificity	Detected in many			Low lineage specificity	Detected in many			Low cancer specificity	Detected in all			Adrenal gland - Adrenal cortex cells, Kidney - Fibroblasts, Minor Salivary Gland - Minor salivary glandular cells, Testis - Early spermatids	Low region specificity	Detected in all
CDKN1B	KIP1, P27KIP1	ENSG00000111276	Cyclin dependent kinase inhibitor 1B	P46527	12	12685498-12722369	Cancer-related genes, Disease related genes, Human disease related genes, Predicted intracellular proteins	Cell cycle	Protein kinase inhibitor	Cancer-related genes, Tumor suppressor	Evidence at protein level	Evidence at protein level	Evidence at protein level	Evidence at protein level	Low tissue specificity	Detected in all			Cell type enhanced	Detected in all		monocytes: 214.6;T-cells: 190.6	Low cell type specificity	Detected in all			Low cancer specificity	Detected in all			Low region specificity	Detected in all			Low immune cell specificity	Detected in all			Low lineage specificity	Detected in all			Low cancer specificity	Detected in all			Thyroid gland - Fibroblasts	Low region specificity	Detected in all
CEP131	AZ1, AZI1, KIAA1118	ENSG00000141577	Centrosomal protein 131	Q9UPN4	17	81189593-81222999	Plasma proteins, Predicted intracellular proteins	Cell cycle, Cilium biogenesis/degradation, Differentiation, Spermatogenesis, Transport	Developmental protein		Evidence at protein level	Evidence at protein level	Evidence at protein level	Evidence at protein level	Low tissue specificity	Detected in many			Cell type enhanced	Detected in many		Spermatogonia: 21.9	Low cell type specificity	Detected in all			Low cancer specificity	Detected in all			Low region specificity	Detected in all			Low immune cell specificity	Detected in many			Low lineage specificity	Detected in all			Low cancer specificity	Detected in all				Low region specificity	Detected in all
CEP152	KIAA0912, MCPH9, SCKL5	ENSG00000103995	Centrosomal protein 152	O94986	15	48712928-48811146	Disease related genes, Human disease related genes, Plasma proteins, Predicted intracellular proteins	Cilium biogenesis/degradation		Disease variant, Dwarfism, Intellectual disability, Primary microcephaly	Evidence at protein level	Evidence at protein level	Evidence at protein level	Evidence at protein level	Tissue enhanced	Detected in many		bone marrow: 16.2	Cell type enhanced	Detected in many		Early spermatids: 187.8;Late spermatids: 78.5	Low cell type specificity	Detected in all			Low cancer specificity	Detected in many			Low region specificity	Detected in all			Low immune cell specificity	Detected in many			Low lineage specificity	Detected in all			Low cancer specificity	Detected in all			Testis - Early spermatids, Testis - Late spermatids	Low region specificity	Detected in many
CEP162	C6orf84, KIAA1009, QN1	ENSG00000135315	Centrosomal protein 162	Q5TB80	6	84124241-84227643	Plasma proteins, Predicted intracellular proteins	Cilium biogenesis/degradation			Evidence at protein level	Evidence at protein level	Evidence at protein level	Evidence at protein level	Low tissue specificity	Detected in all			Cell type enhanced	Detected in all		Early spermatids: 180.2;Late spermatids: 62.3;Oligodendrocytes: 59.6	Low cell type specificity	Detected in all			Low cancer specificity	Detected in many			Low region specificity	Detected in all			Not detected in immune cells	Not detected			Not detected	Not detected			Low cancer specificity	Detected in all			Testis - Early spermatids	Low region specificity	Detected in all
CEP164	KIAA1052, NPHP15	ENSG00000110274	Centrosomal protein 164	Q9UPV0	11	117314557-117413266	Disease related genes, Human disease related genes, Predicted intracellular proteins	Cell cycle, Cell division, Cilium biogenesis/degradation, DNA damage, DNA repair, Mitosis		Ciliopathy, Disease variant, Nephronophthisis	Evidence at protein level	Evidence at transcript level	Evidence at protein level	Evidence at protein level	Low tissue specificity	Detected in all			Cell type enhanced	Detected in many		Cone photoreceptor cells: 219.2;Early spermatids: 203.9;Late spermatids: 319.9;Rod photoreceptor cells: 302.2	Low cell type specificity	Detected in all			Low cancer specificity	Detected in all			Low region specificity	Detected in all			Low immune cell specificity	Detected in all			Low lineage specificity	Detected in all			Low cancer specificity	Detected in all			Adipose subcutaneous - Adipose progenitor cells, Heart muscle - Fibroblasts, Testis - Early spermatids, Testis - Late spermatids	Low region specificity	Detected in all
CEP170	FAM68A, KAB, KIAA0470	ENSG00000143702	Centrosomal protein 170	Q5SW79	1	243124428-243255348	Predicted intracellular proteins, Predicted membrane proteins				Evidence at protein level	Evidence at protein level	Evidence at protein level	Evidence at protein level	Group enriched	Detected in all	5	bone marrow: 52.0;brain: 24.6;testis: 87.3	Cell type enriched	Detected in many	8	Late spermatids: 2467.0	Low cell type specificity	Detected in all			Low cancer specificity	Detected in all			Low region specificity	Detected in all			Low immune cell specificity	Detected in all			Low lineage specificity	Detected in all			Low cancer specificity	Detected in all			Testis - Early spermatids, Testis - Late spermatids	Low region specificity	Detected in all
CEP19	C3orf34, MGC14126	ENSG00000174007	Centrosomal protein 19	Q96LK0	3	196706277-196712250	Disease related genes, Human disease related genes, Predicted intracellular proteins	Cilium biogenesis/degradation		Obesity	Evidence at protein level	Evidence at protein level	Evidence at protein level	Evidence at protein level	Low tissue specificity	Detected in many			Cell type enhanced	Detected in many		Early spermatids: 81.3;Spermatocytes: 61.0;Spermatogonia: 43.5	Low cell type specificity	Detected in all			Low cancer specificity	Detected in many			Low region specificity	Detected in all			Group enriched	Detected in all	8	basophil: 50.9;eosinophil: 58.8;neutrophil: 143.9	Lineage enriched	Detected in all	13	granulocytes: 143.9	Low cancer specificity	Detected in all			Testis - Early spermatids	Low region specificity	Detected in all
CEP192	FLJ10352, KIAA1569, PPP1R62	ENSG00000101639	Centrosomal protein 192	Q8TEP8	18	12991362-13125052	Predicted intracellular proteins				Evidence at protein level	Evidence at transcript level	Evidence at protein level	Evidence at protein level	Low tissue specificity	Detected in all			Cell type enhanced	Detected in many		Astrocytes: 64.1;Excitatory neurons: 91.2;Inhibitory neurons: 87.6;Microglial cells: 59.9;Oligodendrocyte precursor cells: 72.2;Oligodendrocytes: 84.3	Low cell type specificity	Detected in all			Low cancer specificity	Detected in many			Low region specificity	Detected in all			Low immune cell specificity	Detected in some			Low lineage specificity	Detected in many			Low cancer specificity	Detected in all				Low region specificity	Detected in all
CEP20	C16orf63, DKFZp686N1651, FLJ31153, FOPNL, FOR20, PHSECRG2	ENSG00000133393	Centrosomal protein 20	Q96NB1	16	15865719-15888625	Predicted intracellular proteins	Cilium biogenesis/degradation			Evidence at protein level	Evidence at protein level	Evidence at protein level	Evidence at protein level	Low tissue specificity	Detected in all			Group enriched	Detected in all	5	Early spermatids: 230.6;Late spermatids: 566.6	Low cell type specificity	Detected in all			Low cancer specificity	Detected in all			Low region specificity	Detected in all			Low immune cell specificity	Detected in all			Low lineage specificity	Detected in all			Low cancer specificity	Detected in all			Testis - Early spermatids, Thyroid gland - Thyroid glandular cells	Low region specificity	Detected in all
CEP250	C-NAP1, CEP2	ENSG00000126001	Centrosomal protein 250	Q9BV73	20	35455164-35519280	Disease related genes, Human disease related genes, Plasma proteins, Predicted intracellular proteins	Cell cycle, Cilium biogenesis/degradation		Cone-rod dystrophy, Deafness, Disease variant	Evidence at protein level	Evidence at protein level	Evidence at protein level	Evidence at protein level	Low tissue specificity	Detected in all			Low cell type specificity	Detected in many			Low cell type specificity	Detected in all			Low cancer specificity	Detected in all			Low region specificity	Detected in all			Low immune cell specificity	Detected in many			Low lineage specificity	Detected in all			Low cancer specificity	Detected in all			Testis - Early spermatids	Low region specificity	Detected in all
CEP290	3H11Ag, BBS14, CT87, FLJ13615, JBTS5, KIAA0373, LCA10, MKS4, NPHP6, POC3, rd16, SLSN6	ENSG00000198707	Centrosomal protein 290	O15078	12	88049016-88142099	Disease related genes, Human disease related genes, Predicted intracellular proteins	Cilium biogenesis/degradation, Protein transport, Transport	Activator	Bardet-Biedl syndrome, Ciliopathy, Disease variant, Intellectual disability, Joubert syndrome, Leber congenital amaurosis, Meckel syndrome, Nephronophthisis, Obesity, Senior-Loken syndrome	Evidence at protein level	Evidence at transcript level	Evidence at protein level	Evidence at protein level	Low tissue specificity	Detected in many			Cell type enhanced	Detected in all		Rod photoreceptor cells: 214.3;Spermatocytes: 158.2	Low cell type specificity	Detected in all			Low cancer specificity	Detected in many			Low region specificity	Detected in all			Not detected in immune cells	Not detected			Not detected	Not detected			Low cancer specificity	Detected in all				Low region specificity	Detected in many
CEP350	CAP350, KIAA0480	ENSG00000135837	Centrosomal protein 350	Q5VT06	1	179954674-180114880	Plasma proteins, Predicted intracellular proteins				Evidence at protein level	Evidence at protein level	Evidence at protein level	Evidence at protein level	Low tissue specificity	Detected in all			Cell type enhanced	Detected in all		Early spermatids: 515.1;Late spermatids: 1008.7	Low cell type specificity	Detected in all			Low cancer specificity	Detected in all			Low region specificity	Detected in all			Low immune cell specificity	Detected in single			Low lineage specificity	Detected in single			Low cancer specificity	Detected in all			Testis - Early spermatids	Low region specificity	Detected in all
CEP43	FGFR1OP, FOP	ENSG00000213066	Centrosomal protein 43	O95684	6	166999174-167052718	Cancer-related genes, Disease related genes, Predicted intracellular proteins, Predicted membrane proteins	Cilium biogenesis/degradation		Cancer-related genes	Evidence at protein level	Evidence at protein level	Evidence at protein level	Evidence at protein level	Tissue enhanced	Detected in all		testis: 45.0	Cell type enhanced	Detected in all		Early spermatids: 232.1;Late spermatids: 281.8;Spermatocytes: 119.6	Low cell type specificity	Detected in all			Low cancer specificity	Detected in all			Low region specificity	Detected in all			Immune cell enhanced	Detected in many		neutrophil: 30.8	Low lineage specificity	Detected in all			Low cancer specificity	Detected in all			Testis - Early spermatids	Low region specificity	Detected in all
CEP44	KIAA1712	ENSG00000164118	Centrosomal protein 44	Q9C0F1	4	174283730-174333380	Predicted intracellular proteins				Evidence at protein level	Evidence at transcript level	Evidence at protein level	Evidence at protein level	Low tissue specificity	Detected in all			Cell type enhanced	Detected in many		Oligodendrocytes: 54.3	Low cell type specificity	Detected in all			Low cancer specificity	Detected in all			Low region specificity	Detected in all			Low immune cell specificity	Detected in all			Low lineage specificity	Detected in all			Cancer enriched	Detected in all	5	Neuroblastoma: 125.8	Testis - Early spermatids	Low region specificity	Detected in all
CEP55	C10orf3, CT111, FLJ10540	ENSG00000138180	Centrosomal protein 55	Q53EZ4	10	93496612-93529092	Disease related genes, Human disease related genes, Predicted intracellular proteins	Cell cycle, Cell division, Mitosis	Developmental protein	Disease variant	Evidence at protein level	Evidence at protein level	Evidence at protein level	Evidence at protein level	Tissue enhanced	Detected in many		lymphoid tissue: 26.7;testis: 21.1	Cell type enhanced	Detected in many		Early spermatids: 38.7;Extravillous trophoblasts: 17.1;Spermatocytes: 66.2;Undifferentiated cells: 16.8	Not detected	Not detected			Low cancer specificity	Detected in all			Low region specificity	Detected in single			Immune cell enriched	Detected in single	8	T-reg: 1.3	Lineage enriched	Detected in single	14	T-cells: 1.3	Low cancer specificity	Detected in all			Adipose subcutaneous - Macrophages, Adrenal gland - Mitotic cells (Adrenal gland), Colon - Mitotic cells (Colon), Heart muscle - Mitotic cells (Heart), Liver - Kupffer cells, Lung - Mitotic cells (Lung), Minor Salivary Gland - Mitotic cells (Minor salivary gland), Pituitary gland - Corticotropes, Skin - Mitotic cells (Skin), Spleen - Mitotic cells (Spleen), Stomach - Mitotic cells (Stomach), Test…	Low region specificity	Detected in single
CEP63	FLJ13386	ENSG00000182923	Centrosomal protein 63	Q96MT8	3	134485699-134587789	Disease related genes, Human disease related genes, Predicted intracellular proteins	Cell cycle, Cell division, DNA damage, Host-virus interaction, Mitosis		Dwarfism, Intellectual disability	Evidence at protein level	Evidence at protein level	Evidence at protein level	Evidence at protein level	Low tissue specificity	Detected in all			Cell type enhanced	Detected in all		Cardiomyocytes: 126.1;Spermatocytes: 127.0	Low cell type specificity	Detected in all			Low cancer specificity	Detected in all			Low region specificity	Detected in all			Immune cell enhanced	Detected in all		neutrophil: 123.0	Lineage enriched	Detected in all	6	granulocytes: 123.0	Low cancer specificity	Detected in all			Testis - Early spermatids, Thyroid gland - Thyroid glandular cells	Low region specificity	Detected in all
CEP68	KIAA0582	ENSG00000011523	Centrosomal protein 68	Q76N32	2	65056354-65087004	Predicted intracellular proteins				Evidence at protein level	Evidence at protein level	Evidence at protein level	Evidence at protein level	Low tissue specificity	Detected in all			Low cell type specificity	Detected in all			Low cell type specificity	Detected in all			Low cancer specificity	Detected in all			Low region specificity	Detected in all			Low immune cell specificity	Detected in many			Low lineage specificity	Detected in all			Low cancer specificity	Detected in all			Adipose subcutaneous - Endothelial cells, Spleen - Endothelial cells	Low region specificity	Detected in all
CEP70	BITE, FLJ13036	ENSG00000114107	Centrosomal protein 70	Q8NHQ1	3	138494344-138594538	Plasma proteins, Predicted intracellular proteins				Evidence at protein level	Evidence at protein level	Evidence at protein level	Evidence at protein level	Low tissue specificity	Detected in all			Cell type enhanced	Detected in many		Early spermatids: 236.2;Late spermatids: 299.2;Spermatocytes: 142.0	Low cell type specificity	Detected in all			Low cancer specificity	Detected in all			Low region specificity	Detected in all			Group enriched	Detected in many	10	gdT-cell: 2.7;MAIT T-cell: 3.3;memory B-cell: 1.7;memory CD4 T-cell: 2.1;memory CD8 T-cell: 2.3;naive B-cell: 1.4;naive CD4 T-cell: 4.0;naive CD8 T-cell: 4.0;NK-cell: 2.2;T-reg: 1.3	Group enriched	Detected in many	10	B-cells: 1.7;NK-cells: 2.2;T-cells: 4.0	Low cancer specificity	Detected in all			Lung - Alveolar cells type 2, Testis - Early spermatids	Low region specificity	Detected in all
CEP72	FLJ10565, KIAA1519	ENSG00000112877	Centrosomal protein 72	Q9P209	5	612340-667168	Predicted intracellular proteins				Evidence at protein level	Evidence at protein level	Evidence at protein level	Evidence at protein level	Tissue enhanced	Detected in many		testis: 7.0	Cell type enriched	Detected in many	5	Melanocytes: 171.8	Low cell type specificity	Detected in all			Low cancer specificity	Detected in all			Low region specificity	Detected in all			Immune cell enhanced	Detected in many		NK-cell: 4.5	Group enriched	Detected in many	4	B-cells: 1.6;NK-cells: 4.5;T-cells: 1.7	Low cancer specificity	Detected in all			Testis - Spermatocytes	Region enriched	Detected in many
CEP76	C18orf9, FLJ12542, HsT1705	ENSG00000101624	Centrosomal protein 76	Q8TAP6	18	12661833-12702777	Cancer-related genes, Predicted intracellular proteins			Cancer-related genes	Evidence at protein level	Evidence at transcript level	Evidence at protein level	Evidence at protein level	Low tissue specificity	Detected in all			Group enriched	Detected in many	5	Early spermatids: 173.4;Late spermatids: 101.2	Low cell type specificity	Detected in all			Low cancer specificity	Detected in all			Low region specificity	Detected in all			Low immune cell specificity	Detected in many			Low lineage specificity	Detected in all			Low cancer specificity	Detected in all			Testis - Early spermatids, Testis - Late spermatids	Region enriched	Detected in all
CEP83	CCDC41, NPHP18, NY-REN-58	ENSG00000173588	Centrosomal protein 83	Q9Y592	12	94306449-94459988	Disease related genes, Human disease related genes, Predicted intracellular proteins	Cilium biogenesis/degradation		Ciliopathy, Disease variant, Nephronophthisis	Evidence at protein level	Evidence at transcript level	Evidence at protein level	Evidence at protein level	Low tissue specificity	Detected in all			Cell type enhanced	Detected in many		Ciliated cells: 78.9;Early spermatids: 75.2;Oligodendrocyte precursor cells: 69.8	Cell type enhanced	Detected in all		ependymal cell: 474.2	Low cancer specificity	Detected in all			Low region specificity	Detected in all			Low immune cell specificity	Detected in many			Low lineage specificity	Detected in all			Low cancer specificity	Detected in all			Testis - Early spermatids	Low region specificity	Detected in all
CEP89	CCDC123, FLJ14640	ENSG00000121289	Centrosomal protein 89	Q96ST8	19	32875925-32971991	Disease related genes, Predicted intracellular proteins	Cilium biogenesis/degradation			Evidence at protein level	Evidence at protein level	Evidence at protein level	Evidence at protein level	Low tissue specificity	Detected in all			Low cell type specificity	Detected in all			Low cell type specificity	Detected in all			Low cancer specificity	Detected in all			Low region specificity	Detected in all			Low immune cell specificity	Detected in all			Low lineage specificity	Detected in all			Low cancer specificity	Detected in all			Adipose visceral - Adipose progenitor cells, Liver - Vascular Endothelial cells	Low region specificity	Detected in all
CEP97	FLJ23047, LRRIQ2	ENSG00000182504	Centrosomal protein 97	Q8IW35	3	101724534-101770562	Predicted intracellular proteins	Cilium biogenesis/degradation	Calmodulin-binding		Evidence at protein level	Evidence at transcript level	Evidence at protein level	Evidence at protein level	Low tissue specificity	Detected in all			Cell type enhanced	Detected in many		Oligodendrocyte precursor cells: 47.6;Oligodendrocytes: 89.9	Low cell type specificity	Detected in all			Low cancer specificity	Detected in many			Low region specificity	Detected in all			Low immune cell specificity	Detected in single			Low lineage specificity	Detected in single			Low cancer specificity	Detected in all			Testis - Early spermatids, Testis - Spermatocytes	Low region specificity	Detected in all
CERS5	FLJ25304, LASS5, MGC45411, Trh4	ENSG00000139624	Ceramide synthase 5	Q8N5B7	12	50129289-50167533	Enzymes, Metabolic proteins, Predicted membrane proteins	Lipid biosynthesis, Lipid metabolism, Sphingolipid metabolism	Transferase		Evidence at protein level	Evidence at transcript level	Evidence at protein level	Evidence at protein level	Low tissue specificity	Detected in all			Cell type enhanced	Detected in many		Extravillous trophoblasts: 71.6	Low cell type specificity	Detected in all			Low cancer specificity	Detected in all			Low region specificity	Detected in all			Low immune cell specificity	Detected in all			Low lineage specificity	Detected in all			Low cancer specificity	Detected in all			Adipose visceral - Adipose progenitor cells	Low region specificity	Detected in all
CETN3	CEN3	ENSG00000153140	Centrin 3	O15182	5	90392257-90409766	Predicted intracellular proteins	Cell cycle, Cell division, Mitosis, mRNA transport, Protein transport, Translocation, Transport			Evidence at protein level	Evidence at protein level	Evidence at protein level	Evidence at protein level	Tissue enhanced	Detected in all		testis: 126.5	Cell type enhanced	Detected in all		Spermatocytes: 383.7	Low cell type specificity	Detected in all			Low cancer specificity	Detected in all			Low region specificity	Detected in all			Low immune cell specificity	Detected in all			Low lineage specificity	Detected in all			Low cancer specificity	Detected in all			Testis - Early spermatids, Testis - Spermatocytes	Low region specificity	Detected in all
CFAP126	C1orf192, Flattop, Fltp	ENSG00000188931	Cilia and flagella associated protein 126	Q5VTH2	1	161364733-161367876	Predicted intracellular proteins	Cilium biogenesis/degradation			Evidence at protein level	Evidence at protein level	Evidence at protein level	Evidence at protein level	Tissue enhanced	Detected in many		choroid plexus: 207.8;fallopian tube: 146.7	Group enriched	Detected in some	5	Ciliated cells: 298.1;Early spermatids: 152.1;Ionocytes: 78.4	Group enriched	Detected in some	15	choroid plexus epithelial cell: 22.4;ependymal cell: 64.5	Low cancer specificity	Detected in all			Low region specificity	Detected in all			Not detected in immune cells	Not detected			Not detected	Not detected			Low cancer specificity	Detected in all				Low region specificity	Detected in all
CFAP221	FAP221, PCDP1	ENSG00000163075	Cilia and flagella associated protein 221	Q4G0U5	2	119544432-119662251	Predicted intracellular proteins	Cilium biogenesis/degradation	Calmodulin-binding		Evidence at protein level	Evidence at protein level	Evidence at protein level	Evidence at protein level	Tissue enhanced	Detected in many		fallopian tube: 28.6;testis: 24.6	Cell type enhanced	Detected in many		Ciliated cells: 97.7;Early spermatids: 190.1;Excitatory neurons: 90.3;Late spermatids: 276.2;Spermatocytes: 52.8	Cell type enriched	Detected in all	4	ependymal cell: 756.8	Low cancer specificity	Detected in many			Low region specificity	Detected in all			Not detected in immune cells	Not detected			Not detected	Not detected			Cancer enhanced	Detected in some		Kidney cancer: 3.3	Adrenal gland - Adrenal cortex cells, Testis - Early spermatids, Testis - Late spermatids	Low region specificity	Detected in some
CFAP298	C21orf48, C21orf59, CILD26, DNAAF16, FBB18, FLJ20467, Kur	ENSG00000159079	Cilia and flagella associated protein 298	P57076	21	32592079-32612603	Disease related genes, Human disease related genes, Predicted intracellular proteins			Ciliopathy, Kartagener syndrome, Primary ciliary dyskinesia	Evidence at protein level	Evidence at protein level	Evidence at protein level	Evidence at protein level	Low tissue specificity	Detected in all			Cell type enhanced	Detected in all		Ciliated cells: 250.8;Muller glia cells: 200.4;Spermatocytes: 235.4	Low cell type specificity	Detected in all			Low cancer specificity	Detected in all			Low region specificity	Detected in all			Low immune cell specificity	Detected in all			Low lineage specificity	Detected in all			Low cancer specificity	Detected in all			Lung - Respiratory ciliated cells, Testis - Early spermatids	Low region specificity	Detected in all
CFAP300	C11orf70, DNAAF17, FBB5, MGC13040	ENSG00000137691	Cilia and flagella associated protein 300	Q9BRQ4	11	102047437-102084554	Disease related genes, Human disease related genes, Predicted intracellular proteins			Ciliopathy, Disease variant, Kartagener syndrome, Primary ciliary dyskinesia	Evidence at protein level	Evidence at protein level	Evidence at protein level	Evidence at protein level	Tissue enhanced	Detected in many		choroid plexus: 23.6;fallopian tube: 28.2;testis: 29.3	Cell type enhanced	Detected in many		Ciliated cells: 206.1;Early spermatids: 522.3;Ionocytes: 82.5;Spermatocytes: 239.2	Group enriched	Detected in many	4	choroid plexus epithelial cell: 64.8;ependymal cell: 170.5	Low cancer specificity	Detected in many			Low region specificity	Detected in all			Not detected in immune cells	Not detected			Not detected	Not detected			Low cancer specificity	Detected in many			Heart muscle - Fibroblasts, Lung - Respiratory ciliated cells, Testis - Early spermatids	Low region specificity	Detected in all
CFAP410	A2, C21orf2, LRRC76, YF5	ENSG00000160226	Cilia and flagella associated protein 410	O43822	21	44328944-44339402	Disease related genes, Human disease related genes, Predicted intracellular proteins	Cilium biogenesis/degradation, DNA damage		Ciliopathy, Disease variant, Dwarfism	Evidence at protein level	Evidence at protein level	Evidence at protein level	Evidence at protein level	Low tissue specificity	Detected in all			Cell type enhanced	Detected in all		Late spermatids: 230.1	Low cell type specificity	Detected in all			Low cancer specificity	Detected in all			Low region specificity	Detected in all			Low immune cell specificity	Detected in all			Low lineage specificity	Detected in all			Low cancer specificity	Detected in all				Low region specificity	Detected in all
CFAP418	BBS21, C8orf37, CORD16, FAP418, FLJ30600, MOT25, RP64	ENSG00000156172	Cilia and flagella associated protein 418	Q96NL8	8	95244913-95269201	Disease related genes, Human disease related genes, Predicted intracellular proteins			Bardet-Biedl syndrome, Ciliopathy, Cone-rod dystrophy, Disease variant, Obesity, Retinitis pigmentosa	Evidence at protein level	Evidence at transcript level	Evidence at protein level	Evidence at protein level	Low tissue specificity	Detected in many			Cell type enhanced	Detected in many		Early spermatids: 10.1	Cell type enhanced	Detected in all		ependymal cell: 56.2	Low cancer specificity	Detected in many			Low region specificity	Detected in all			Not detected in immune cells	Not detected			Not detected	Not detected			Low cancer specificity	Detected in all			Adrenal gland - Adrenal cortex cells	Low region specificity	Detected in all
CFAP45	CCDC19, NESG1	ENSG00000213085	Cilia and flagella associated protein 45	Q9UL16	1	159872364-159900165	Disease related genes, Human disease related genes, Predicted intracellular proteins			Ciliopathy, Disease variant, Heterotaxy	Evidence at protein level	Evidence at protein level	Evidence at protein level	Evidence at protein level	Group enriched	Detected in some	7	choroid plexus: 36.2;fallopian tube: 43.3;testis: 27.6	Group enriched	Detected in many	4	Ciliated cells: 161.4;Early spermatids: 299.7;Late spermatids: 78.6	Cell type enriched	Detected in some	5	ependymal cell: 158.8	Cancer enhanced	Detected in many		Uterine Corpus Endometrial Carcinoma (TCGA): 14.4	Low region specificity	Detected in many			Group enriched	Detected in some	8	eosinophil: 3.0;neutrophil: 2.4	Lineage enriched	Detected in single	9	granulocytes: 3.0	Cancer enhanced	Detected in many		Bile duct cancer: 7.3	Kidney - Podocytes, Lung - Respiratory ciliated cells, Testis - Early spermatids, Testis - Late spermatids	Low region specificity	Detected in many
CFAP52	FLJ37528, WDR16, WDRPUH	ENSG00000166596	Cilia and flagella associated protein 52	Q8N1V2	17	9576627-9643447	Disease related genes, Human disease related genes, Predicted intracellular proteins			Disease variant, Heterotaxy	Evidence at protein level	Evidence at protein level	Evidence at protein level	Evidence at protein level	Tissue enhanced	Detected in some		choroid plexus: 38.5;fallopian tube: 55.9	Cell type enhanced	Detected in some		Ciliated cells: 143.0;Early spermatids: 44.4;Ionocytes: 25.8;Spermatocytes: 26.8	Cell type enriched	Detected in many	5	ependymal cell: 591.8	Cancer enhanced	Detected in some		Glioblastoma Multiforme (TCGA): 3.5	Low region specificity	Detected in all			Not detected in immune cells	Not detected			Not detected	Not detected			Low cancer specificity	Detected in some			Lung - Respiratory ciliated cells, Testis - Early spermatids	Low region specificity	Detected in many
CFAP53	CCDC11, FLJ32743	ENSG00000172361	Cilia and flagella associated protein 53	Q96M91	18	50227193-50266495	Disease related genes, Human disease related genes, Predicted intracellular proteins	Cilium biogenesis/degradation, Differentiation, Spermatogenesis	Developmental protein	Ciliopathy, Disease variant, Heterotaxy	Evidence at protein level	Evidence at protein level	Evidence at protein level	Evidence at protein level	Group enriched	Detected in many	7	choroid plexus: 19.9;fallopian tube: 27.6;testis: 77.4	Group enriched	Detected in many	14	Ciliated cells: 273.6;Early spermatids: 908.8;Late spermatids: 560.7;Spermatocytes: 403.7	Group enriched	Detected in all	7	choroid plexus epithelial cell: 50.0;ependymal cell: 181.9	Low cancer specificity	Detected in many			Low region specificity	Detected in all			Not detected in immune cells	Not detected			Not detected	Not detected			Low cancer specificity	Detected in many			Lung - Respiratory ciliated cells, Testis - Early spermatids
CFAP57	FLJ32000, WDR65	ENSG00000243710	Cilia and flagella associated protein 57	Q96MR6	1	43172330-43254358	Predicted intracellular proteins, Predicted membrane proteins				Evidence at protein level	Evidence at protein level	Evidence at transcript level	Evidence at protein level	Group enriched	Detected in some	6	choroid plexus: 13.6;fallopian tube: 22.7;testis: 15.3	Group enriched	Detected in some	6	Ciliated cells: 71.9;Early spermatids: 49.7;Late spermatids: 22.4;Spermatocytes: 21.7	Group enriched	Detected in many	6	choroid plexus epithelial cell: 42.1;ependymal cell: 126.2	Cancer enhanced	Detected in some		Uterine Corpus Endometrial Carcinoma (TCGA): 2.9	Region enhanced	Detected in all		choroid plexus: 23.2	Immune cell enhanced	Detected in single		non-classical monocyte: 1.2	Low lineage specificity	Detected in single			Cancer enhanced	Detected in some		Adrenocortical cancer: 4.1;lymphoma: 3.7	Liver - Hepatocytes, Lung - Respiratory ciliated cells, Testis - Early spermatids	Low region specificity	Detected in many
CFAP70	FLJ25765, TTC18	ENSG00000156042	Cilia and flagella associated protein 70		10	73253762-73358864	Human disease related genes, Predicted intracellular proteins				Evidence at protein level	Evidence at protein level			Tissue enhanced	Detected in many		choroid plexus: 58.6	Cell type enhanced	Detected in many		Astrocytes: 65.0;Ciliated cells: 145.1;Early spermatids: 65.3;Late spermatids: 40.9;Spermatocytes: 53.7	Group enriched	Detected in all	4	choroid plexus epithelial cell: 423.7;ependymal cell: 1161.9	Low cancer specificity	Detected in many			Low region specificity	Detected in all			Not detected in immune cells	Not detected			Not detected	Not detected			Cancer enhanced	Detected in some		prostate cancer: 3.6	Lung - Respiratory ciliated cells, Testis - Early spermatids	Low region specificity	Detected in many
CFAP97	DKFZp434F1728, hmw, KIAA1430	ENSG00000164323	Cilia and flagella associated protein 97	Q9P2B7	4	185159665-185209504	Predicted intracellular proteins				Evidence at protein level	Evidence at protein level	Evidence at protein level	Evidence at protein level	Low tissue specificity	Detected in all			Cell type enhanced	Detected in all		Early spermatids: 337.1	Low cell type specificity	Detected in all			Low cancer specificity	Detected in all			Low region specificity	Detected in all			Low immune cell specificity	Detected in many			Low lineage specificity	Detected in all			Low cancer specificity	Detected in all			Testis - Early spermatids	Low region specificity	Detected in all
CHRM2		ENSG00000181072	Cholinergic receptor muscarinic 2	P08172	7	136868652-137020255	Disease related genes, FDA approved drug targets, G-protein coupled receptors, Predicted membrane proteins		G-protein coupled receptor, Receptor, Transducer	FDA approved drug targets	Evidence at protein level	Evidence at transcript level	Evidence at protein level	Evidence at protein level	Tissue enhanced	Detected in some		heart muscle: 34.9;intestine: 20.5	Group enriched	Detected in some	7	Cardiomyocytes: 71.7;Excitatory neurons: 47.5;Inhibitory neurons: 113.6	Cell type enhanced	Detected in all		midbrain-derived inhibitory: 1544.5	Cancer enhanced	Detected in single		Stomach Adenocarcinoma (TCGA): 1.6	Low region specificity	Detected in all			Not detected in immune cells	Not detected			Not detected	Not detected			Cancer enriched	Detected in some	5	Neuroblastoma: 11.0	Heart muscle - Cardiomyocytes, Liver - Hepatic stellate cells, Testis - Early spermatids, Testis - Late spermatids	Low region specificity	Detected in all
CHRNA3		ENSG00000080644	Cholinergic receptor nicotinic alpha 3 subunit	P32297	15	78593052-78621295	Disease related genes, FDA approved drug targets, Predicted intracellular proteins, Predicted membrane proteins	Ion transport, Transport	Ion channel, Ligand-gated ion channel, Receptor	Disease variant, FDA approved drug targets	Evidence at protein level	Evidence at protein level	Evidence at protein level	Evidence at protein level	Group enriched	Detected in some	7	adrenal gland: 38.1;lymphoid tissue: 64.2;retina: 51.9	Cell type enriched	Detected in some	6	Cone photoreceptor cells: 407.8	Group enriched	Detected in some	8	cerebellar inhibitory: 55.5;midbrain-derived inhibitory: 49.0	Cancer enhanced	Detected in some		Testicular Germ Cell Tumor (TCGA): 2.6	Low region specificity	Detected in all			Not detected in immune cells	Not detected			Not detected	Not detected			Cancer enriched	Detected in some	20	Neuroblastoma: 170.3	Adrenal gland - Adrenal medulla cells, Colon - Colon enteroendocrine cells	Low region specificity	Detected in many
CIB2	DFNB48, KIP2, USH1J	ENSG00000136425	Calcium and integrin binding family member 2	O75838	15	78104606-78131535	Cancer-related genes, Disease related genes, Human disease related genes, Potential drug targets, Predicted intracellular proteins, Transporters			Cancer-related genes, Deafness, Disease variant, Non-syndromic deafness, Retinitis pigmentosa, Usher syndrome	Evidence at protein level	Evidence at transcript level	Evidence at protein level	Evidence at protein level	Tissue enhanced	Detected in all		heart muscle: 46.2;lymphoid tissue: 46.7	Cell type enriched	Detected in many	4	Late spermatids: 285.4	Low cell type specificity	Detected in many			Low cancer specificity	Detected in all			Low region specificity	Detected in all			Immune cell enriched	Detected in single	48	plasmacytoid DC: 18.7	Lineage enriched	Detected in single	48	dendritic cells: 18.7	Cancer enhanced	Detected in all		testis cancer: 45.5	Liver - Vascular Endothelial cells, Spleen - Fibroblast_1, Stomach - Fibroblasts, Testis - Late spermatids	Low region specificity	Detected in all
CILK1	ICK, KIAA0936, LCK2, MGC46090, MRK	ENSG00000112144	Ciliogenesis associated kinase 1	Q9UPZ9	6	53001279-53061824	Disease related genes, Enzymes, Human disease related genes, Potential drug targets, Predicted intracellular proteins	Cilium biogenesis/degradation	Developmental protein, Kinase, Serine/threonine-protein kinase, Transferase	Disease variant, Epilepsy	Evidence at protein level	Evidence at transcript level	Evidence at protein level	Evidence at protein level	Low tissue specificity	Detected in all			Cell type enhanced	Detected in all		Cone photoreceptor cells: 113.8	Cell type enhanced	Detected in all		committed oligodendrocyte precursor: 137.1	Low cancer specificity	Detected in all			Low region specificity	Detected in all			Low immune cell specificity	Detected in many			Low lineage specificity	Detected in all			Low cancer specificity	Detected in all			Liver - Hepatocytes	Low region specificity	Detected in all
CIP2A	KIAA1524	ENSG00000163507	Cellular inhibitor of PP2A	Q8TCG1	3	108549864-108589644	Predicted intracellular proteins, Predicted membrane proteins	DNA damage			Evidence at protein level	Evidence at transcript level	Evidence at protein level	Evidence at protein level	Low tissue specificity	Detected in many			Cell type enhanced	Detected in many		Early spermatids: 109.4;Erythroid cells: 30.7;Spermatocytes: 38.7	Low cell type specificity	Detected in all			Low cancer specificity	Detected in many			Low region specificity	Detected in many			Not detected in immune cells	Not detected			Not detected	Not detected			Low cancer specificity	Detected in all			Lung - Mitotic cells (Lung), Minor Salivary Gland - Mitotic cells (Minor salivary gland), Skin - Mitotic cells (Skin), Spleen - Mitotic cells (Spleen), Testis - Early spermatids, Testis - Spermatocytes	Low region specificity	Detected in all
CKAP2	FLJ10749, LB1, se20-10, TMAP	ENSG00000136108	Cytoskeleton associated protein 2	Q8WWK9	13	52455429-52476628	Predicted intracellular proteins	Apoptosis, Cell cycle			Evidence at protein level	Evidence at protein level	Evidence at protein level	Evidence at protein level	Tissue enhanced	Detected in all		bone marrow: 66.9	Cell type enhanced	Detected in all		Erythroid cells: 114.3;Spermatocytes: 152.8	Low cell type specificity	Detected in all			Low cancer specificity	Detected in all			Low region specificity	Detected in all			Low immune cell specificity	Detected in all			Low lineage specificity	Detected in all			Low cancer specificity	Detected in all			Lung - Mitotic cells (Lung), Skin - Mitotic cells (Skin), Spleen - Mitotic cells (Spleen), Testis - Spermatocytes	Low region specificity	Detected in some
CKAP2L	FLJ40629, radmis	ENSG00000169607	Cytoskeleton associated protein 2 like	Q8IYA6	2	112736349-112764664	Disease related genes, Human disease related genes, Predicted intracellular proteins			Intellectual disability	Evidence at protein level	Evidence at protein level	Evidence at protein level	Evidence at protein level	Group enriched	Detected in some	4	bone marrow: 13.0;lymphoid tissue: 11.7;testis: 4.4	Cell type enhanced	Detected in many		Cytotrophoblasts: 12.2;Erythroid cells: 29.5;Extravillous trophoblasts: 12.2;Spermatocytes: 35.6;Spermatogonia: 37.3	Cell type enhanced	Detected in single		hippocampal dentate gyrus: 1.3	Low cancer specificity	Detected in many			Low region specificity	Detected in all			Not detected in immune cells	Not detected			Not detected	Not detected			Low cancer specificity	Detected in all			Adrenal gland - Mitotic cells (Adrenal gland), Colon - Mitotic cells (Colon), Heart muscle - Mitotic cells (Heart), Lung - Mitotic cells (Lung), Minor Salivary Gland - Mitotic cells (Minor salivary gland), Skin - Mitotic cells (Skin), Spleen - Mitotic cells (Spleen), Stomach - Mitotic cells (Stomach), Testis - Spermatocytes, Thyroid gland - Mitotic cells (Thyroid)	Low region specificity	Detected in some
CKAP5	ch-TOG, KIAA0097, TOG, TOGp	ENSG00000175216	Cytoskeleton associated protein 5	Q14008	11	46743048-46846308	Plasma proteins, Predicted intracellular proteins	Cell cycle, Cell division, Mitosis			Evidence at protein level	Evidence at protein level	Evidence at protein level	Evidence at protein level	Low tissue specificity	Detected in all			Cell type enhanced	Detected in all		Early spermatids: 118.2;Spermatocytes: 114.2	Low cell type specificity	Detected in all			Low cancer specificity	Detected in all			Low region specificity	Detected in all			Low immune cell specificity	Detected in many			Low lineage specificity	Detected in all			Low cancer specificity	Detected in all			Adrenal gland - Adrenal cortex cells, Skin - Mitotic cells (Skin), Testis - Spermatocytes	Low region specificity	Detected in all
CLNS1A	CLCI, ICln	ENSG00000074201	Chloride nucleotide-sensitive channel 1A	P54105	11	77514936-77637794	Predicted intracellular proteins, Transporters	mRNA processing, mRNA splicing			Evidence at protein level	Evidence at protein level	Evidence at protein level	Evidence at protein level	Low tissue specificity	Detected in all			Low cell type specificity	Detected in all			Low cell type specificity	Detected in all			Low cancer specificity	Detected in all			Low region specificity	Detected in all			Low immune cell specificity	Detected in all			Low lineage specificity	Detected in all			Low cancer specificity	Detected in all			Thyroid gland - Thyroid glandular cells	Low region specificity	Detected in all
CLRN1	RP61, USH3, USH3A	ENSG00000163646	Clarin 1	P58418	3	150926163-150972727	Disease related genes, Human disease related genes, Potential drug targets, Predicted intracellular proteins, Predicted membrane proteins, Transporters	Hearing, Sensory transduction, Vision		Deafness, Disease variant, Retinitis pigmentosa, Usher syndrome	Evidence at protein level	Evidence at transcript level	Evidence at protein level	Evidence at protein level	Group enriched	Detected in some	7	adrenal gland: 4.8;retina: 12.4	Cell type enriched	Detected in some	24	Muller glia cells: 138.5	Cell type enhanced	Detected in some		lower rhombic lip: 1.4;thalamic excitatory: 1.4	Not detected	Not detected			Low region specificity	Detected in all			Not detected in immune cells	Not detected			Not detected	Not detected			Not detected	Not detected				Low region specificity	Detected in some
CLUAP1	CFAP22, FAP22, FLJ13297, IFT38, KIAA0643	ENSG00000103351	Clusterin associated protein 1	Q96AJ1	16	3500976-3539048	Predicted intracellular proteins	Cilium biogenesis/degradation			Evidence at protein level	Evidence at protein level	Evidence at protein level	Evidence at protein level	Low tissue specificity	Detected in all			Cell type enhanced	Detected in all		Ciliated cells: 101.1;Early spermatids: 201.4;Spermatocytes: 110.1	Low cell type specificity	Detected in all			Low cancer specificity	Detected in all			Low region specificity	Detected in all			Low immune cell specificity	Detected in all			Low lineage specificity	Detected in all			Low cancer specificity	Detected in all			Testis - Early spermatids, Thyroid gland - Thyroid glandular cells	Low region specificity	Detected in all
CNGA1	CNCG, CNCG1, CNG1, RCNC1, RCNCa, RP49	ENSG00000198515	Cyclic nucleotide gated channel subunit alpha 1	P29973	4	47935977-48016681	Disease related genes, Human disease related genes, Potential drug targets, Predicted intracellular proteins, Predicted membrane proteins, Transporters, Voltage-gated ion channels	Calcium transport, Ion transport, Sensory transduction, Sodium transport, Transport, Vision	Calcium channel, Ion channel, Ligand-gated ion channel, Sodium channel	Disease variant, Retinitis pigmentosa	Evidence at protein level	Evidence at protein level	Evidence at protein level	Evidence at protein level	Tissue enriched	Detected in many	11	retina: 256.4	Cell type enriched	Detected in many	4	Rod photoreceptor cells: 908.7	Cell type enhanced	Detected in many		pericyte: 67.8;vascular associated smooth muscle cell: 38.8	Low cancer specificity	Detected in many			Low region specificity	Detected in all			Not detected in immune cells	Not detected			Not detected	Not detected			Low cancer specificity	Detected in many			Liver - Hepatocytes	Region enhanced	Detected in single
CNTRL	CEP1, CEP110	ENSG00000119397	Centriolin	Q7Z7A1	9	121074660-121177729	Cancer-related genes, Disease related genes, Plasma proteins, Predicted intracellular proteins	Cell cycle, Cell division		Cancer-related genes	Evidence at protein level	Evidence at protein level	Evidence at protein level	Evidence at protein level	Tissue enhanced	Detected in many		lymphoid tissue: 21.2;testis: 29.5	Cell type enhanced	Detected in many		Early spermatids: 178.0;Spermatocytes: 379.6	Low cell type specificity	Detected in all			Low cancer specificity	Detected in all			Low region specificity	Detected in all			Low immune cell specificity	Detected in all			Low lineage specificity	Detected in all			Low cancer specificity	Detected in all			Adipose visceral - T-cells, Spleen - B-cells (Spleen), Testis - Early spermatids	Low region specificity	Detected in all
CNTROB	LIP8, PP1221	ENSG00000170037	Centrobin, centriole duplication and spindle assembly protein	Q8N137	17	7932101-7949920	Predicted intracellular proteins	Cell cycle, Cell division			Evidence at protein level	Evidence at protein level	Evidence at protein level	Evidence at protein level	Low tissue specificity	Detected in all			Cell type enhanced	Detected in many		Spermatocytes: 40.3	Low cell type specificity	Detected in all			Low cancer specificity	Detected in all			Low region specificity	Detected in all			Low immune cell specificity	Detected in many			Low lineage specificity	Detected in all			Low cancer specificity	Detected in all			Adipose subcutaneous - Adipose progenitor cells, Testis - Early spermatids	Low region specificity	Detected in all
CORO2A	IR10, WDR2	ENSG00000106789	Coronin 2A	Q92828	9	98120975-98192637	Predicted intracellular proteins		Actin-binding		Evidence at protein level	Evidence at protein level	Evidence at protein level	Evidence at protein level	Tissue enhanced	Detected in many		intestine: 34.1	Cell type enhanced	Detected in many		Basal respiratory cells: 48.2;Club cells: 48.2;Distal enterocytes: 79.2;Ionocytes: 48.6;Proximal enterocytes: 92.8	Low cell type specificity	Detected in many			Low cancer specificity	Detected in many			Low region specificity	Detected in all			Low immune cell specificity	Detected in many			Group enriched	Detected in many	6	granulocytes: 11.4;monocytes: 7.8;T-cells: 11.9	Low cancer specificity	Detected in all			Minor Salivary Gland - Minor salivary gland basal cells, Skin - Keratinocyte (granular), Stomach - Gastric mucous cells, Testis - Sertoli cells	Low region specificity	Detected in all
CREB1		ENSG00000118260	CAMP responsive element binding protein 1	P16220	2	207529737-207605988	Cancer-related genes, Disease related genes, Predicted intracellular proteins, Transcription factors	Biological rhythms, Differentiation, Host-virus interaction, Transcription, Transcription regulation	Activator, DNA-binding	Cancer-related genes	Evidence at protein level	Evidence at protein level	Evidence at protein level	Evidence at protein level	Low tissue specificity	Detected in all			Cell type enhanced	Detected in all		Early spermatids: 422.9	Low cell type specificity	Detected in all			Low cancer specificity	Detected in all			Low region specificity	Detected in all			Low immune cell specificity	Detected in all			Low lineage specificity	Detected in all			Low cancer specificity	Detected in all			Testis - Early spermatids	Low region specificity	Detected in all
CREB3	Luman, LZIP, sLZIP	ENSG00000107175	CAMP responsive element binding protein 3	O43889	9	35732598-35736999	Predicted membrane proteins, Transcription factors	Chemotaxis, Host-virus interaction, Transcription, Transcription regulation, Unfolded protein response	Activator, DNA-binding, Repressor		Evidence at protein level	Evidence at protein level	Evidence at protein level	Evidence at protein level	Low tissue specificity	Detected in all			Cell type enhanced	Detected in all		Late spermatids: 427.5	Low cell type specificity	Detected in all			Low cancer specificity	Detected in all			Low region specificity	Detected in all			Low immune cell specificity	Detected in all			Low lineage specificity	Detected in all			Low cancer specificity	Detected in all			Adrenal gland - Adrenal cortex cells, Testis - Early spermatids, Testis - Late spermatids, Thyroid gland - Thyroid glandular cells	Low region specificity	Detected in all
CRK		ENSG00000167193	CRK proto-oncogene, adaptor protein	P46108	17	1420689-1463162	Predicted intracellular proteins			Proto-oncogene	Evidence at protein level	Evidence at protein level	Evidence at protein level	Evidence at protein level	Low tissue specificity	Detected in all			Low cell type specificity	Detected in all			Low cell type specificity	Detected in all			Low cancer specificity	Detected in all			Low region specificity	Detected in all			Low immune cell specificity	Detected in all			Low lineage specificity	Detected in all			Low cancer specificity	Detected in all				Low region specificity	Detected in all
CROCC	CROCC1, ROLT, rootletin	ENSG00000058453	Ciliary rootlet coiled-coil, rootletin	Q5TZA2	1	16740273-16972964	Predicted intracellular proteins	Cell cycle, Cilium biogenesis/degradation			Evidence at protein level	Evidence at protein level	Evidence at protein level	Evidence at protein level	Low tissue specificity	Detected in many			Cell type enhanced	Detected in many		Ciliated cells: 48.6;Rod photoreceptor cells: 126.5	Cell type enhanced	Detected in all		ependymal cell: 231.3	Low cancer specificity	Detected in all			Low region specificity	Detected in all			Not detected in immune cells	Not detected			Not detected	Not detected			Low cancer specificity	Detected in many			Lung - Respiratory ciliated cells	Low region specificity	Detected in all
CRX	CORD2, CRD, LCA7, OTX3	ENSG00000105392	Cone-rod homeobox	O43186	19	47819779-47843330	Disease related genes, Human disease related genes, Predicted intracellular proteins, Transcription factors	Differentiation, Neurogenesis, Sensory transduction, Transcription, Transcription regulation, Vision	Activator, Developmental protein, DNA-binding	Cone-rod dystrophy, Disease variant, Leber congenital amaurosis, Retinitis pigmentosa	Evidence at protein level	Evidence at protein level	Evidence at protein level	Evidence at protein level	Tissue enriched	Detected in some	124	retina: 211.4	Group enriched	Detected in some	6	Bipolar cells: 139.8;Cone photoreceptor cells: 309.2;Rod photoreceptor cells: 415.3	Group enriched	Detected in some	6	choroid plexus epithelial cell: 3.6;upper rhombic lip: 1.1	Not detected	Not detected			Low region specificity	Detected in all			Not detected in immune cells	Not detected			Not detected	Not detected			Cancer enhanced	Detected in some		Brain cancer: 1.2;Uterine cancer: 1.4		Not detected	Not detected
CRYBG3	DKFZp667G2110	ENSG00000080200	Crystallin beta-gamma domain containing 3	Q68DQ2	3	97822011-97944984	Predicted intracellular proteins				Evidence at protein level	Evidence at transcript level	Evidence at protein level	Evidence at protein level	Low tissue specificity	Detected in many			Cell type enhanced	Detected in many		Adipocytes: 123.2;Bipolar cells: 107.5;Early spermatids: 117.1;Late spermatids: 131.7;Oligodendrocytes: 119.4	Cell type enhanced	Detected in all		mammillary body: 311.8	Low cancer specificity	Detected in many			Low region specificity	Detected in all			Immune cell enhanced	Detected in some		plasmacytoid DC: 3.6	Group enriched	Detected in many	8	dendritic cells: 3.6;granulocytes: 1.5;monocytes: 1.4	Low cancer specificity	Detected in all			Adrenal gland - Adrenal cortex cells, Stomach - Endothelial cells, Testis - Spermatocytes	Low region specificity	Detected in all
CSNK1D	CKID, CKIdelta, HCKID	ENSG00000141551	Casein kinase 1 delta	P48730	17	82239023-82273700	Disease related genes, Enzymes, Human disease related genes, Plasma proteins, Potential drug targets, Predicted intracellular proteins	Biological rhythms, Wnt signaling pathway	Kinase, Serine/threonine-protein kinase, Transferase	Disease variant	Evidence at protein level	Evidence at protein level	Evidence at protein level	Evidence at protein level	Low tissue specificity	Detected in all			Cell type enhanced	Detected in all		Late spermatids: 800.8	Low cell type specificity	Detected in all			Low cancer specificity	Detected in all			Low region specificity	Detected in all			Low immune cell specificity	Detected in all			Low lineage specificity	Detected in all			Low cancer specificity	Detected in all			Minor Salivary Gland - Minor salivary glandular cells	Low region specificity	Detected in all
CSPP1	CSPP, CSPP-L, FLJ22490, JBTS21	ENSG00000104218	Centrosome and spindle pole associated protein 1	Q1MSJ5	8	67062417-67196778	Disease related genes, Human disease related genes, Predicted intracellular proteins			Ciliopathy, Joubert syndrome	Evidence at protein level	Evidence at protein level	Evidence at protein level	Evidence at protein level	Low tissue specificity	Detected in all			Cell type enhanced	Detected in all		Ciliated cells: 203.3;Early spermatids: 184.7;Rod photoreceptor cells: 224.9	Cell type enhanced	Detected in all		ependymal cell: 878.0	Low cancer specificity	Detected in many			Low region specificity	Detected in all			Low immune cell specificity	Detected in some			Low lineage specificity	Detected in many			Low cancer specificity	Detected in all			Testis - Early spermatids	Low region specificity	Detected in all
CSTF2T	CstF-64T, DKFZp434C1013, KIAA0689, tauCstF-64	ENSG00000177613	Cleavage stimulation factor subunit 2 tau variant	Q9H0L4	10	51695486-51699595	Predicted intracellular proteins	mRNA processing	RNA-binding		Evidence at protein level	Evidence at transcript level	Evidence at protein level	Evidence at protein level	Low tissue specificity	Detected in all			Low cell type specificity	Detected in many			Low cell type specificity	Detected in all			Low cancer specificity	Detected in all			Low region specificity	Detected in all			Low immune cell specificity	Detected in all			Low lineage specificity	Detected in all			Low cancer specificity	Detected in all			Adrenal gland - Adrenal cortex cells, Testis - Spermatocytes, Testis - Spermatogonia, Thyroid gland - Macrophages	Low region specificity	Detected in all
CSTPP1	C11orf49, FLJ22210, MGC4707	ENSG00000149179	Centriolar satellite-associated tubulin polyglutamylase complex regulator 1	Q9H6J7	11	46936689-47164385	Predicted intracellular proteins				Evidence at protein level	Evidence at transcript level	Evidence at protein level	Evidence at protein level	Low tissue specificity	Detected in all			Cell type enhanced	Detected in all		Astrocytes: 132.8;Excitatory neurons: 136.1;Inhibitory neurons: 108.2	Low cell type specificity	Detected in all			Low cancer specificity	Detected in all			Low region specificity	Detected in all			Low immune cell specificity	Detected in many			Low lineage specificity	Detected in all			Low cancer specificity	Detected in all			Adipose subcutaneous - Adipose progenitor cells, Skin - Keratinocyte (other), Testis - Early spermatids, Thyroid gland - Thyroid glandular cells	Low region specificity	Detected in all
CTNNB1	armadillo, beta-catenin, CTNNB	ENSG00000168036	Catenin beta 1	P35222	3	41194741-41260096	Cancer-related genes, Disease related genes, Human disease related genes, Plasma proteins, Predicted intracellular proteins	Cell adhesion, Host-virus interaction, Neurogenesis, Transcription, Transcription regulation, Wnt signaling pathway	Activator	Cancer-related genes, Disease variant, Intellectual disability	Evidence at protein level	Evidence at protein level	Evidence at protein level	Evidence at protein level	Low tissue specificity	Detected in all			Cell type enhanced	Detected in all		monocytes: 570.0;Syncytiotrophoblasts: 463.4	Cell type enhanced	Detected in all		endothelial cell: 823.7	Low cancer specificity	Detected in all			Low region specificity	Detected in all			Low immune cell specificity	Detected in all			Low lineage specificity	Detected in all			Low cancer specificity	Detected in all				Low region specificity	Detected in all
CTNND1	CTNND, KIAA0384, p120, p120cas, p120ctn	ENSG00000198561	Catenin delta 1	O60716	11	57753243-57819546	Cancer-related genes, Disease related genes, Human disease related genes, Plasma proteins, Potential drug targets, Predicted intracellular proteins, Transporters	Cell adhesion, Transcription, Transcription regulation, Wnt signaling pathway		Cancer-related genes, Disease variant, Ectodermal dysplasia	Evidence at protein level	Evidence at protein level	Evidence at protein level	Evidence at protein level	Low tissue specificity	Detected in all			Cell type enhanced	Detected in many		Distal enterocytes: 118.6;Squamous epithelial cells: 145.6	Low cell type specificity	Detected in all			Low cancer specificity	Detected in all			Low region specificity	Detected in all			Group enriched	Detected in some	5	classical monocyte: 4.8;intermediate monocyte: 9.4;myeloid DC: 6.4;non-classical monocyte: 5.8	Group enriched	Detected in many	19	dendritic cells: 6.4;monocytes: 9.4	Low cancer specificity	Detected in all			Adipose subcutaneous - Endothelial cells, Adrenal gland - Adrenal cortex cells, Prostate - Prostate basal glandular cells, Skin - Keratinocyte (other), Spleen - Endothelial cells, Stomach - Gastric mucous cells	Low region specificity	Detected in all
CYLD	CYLD1, KIAA0849, USPL2	ENSG00000083799	CYLD lysine 63 deubiquitinase	Q9NQC7	16	50742050-50801935	Cancer-related genes, Disease related genes, Enzymes, Human disease related genes, Metabolic proteins, Potential drug targets, Predicted intracellular proteins	Cell cycle, Immunity, Innate immunity, Ubl conjugation pathway, Wnt signaling pathway	Hydrolase, Protease, Thiol protease	Amyotrophic lateral sclerosis, Cancer-related genes, Disease variant, Neurodegeneration, Tumor suppressor	Evidence at protein level	Evidence at protein level	Evidence at protein level	Evidence at protein level	Tissue enhanced	Detected in all		bone marrow: 93.2	Low cell type specificity	Detected in all			Low cell type specificity	Detected in all			Low cancer specificity	Detected in all			Low region specificity	Detected in all			Low immune cell specificity	Detected in all			Low lineage specificity	Detected in all			Low cancer specificity	Detected in all			Testis - Early spermatids, Testis - Spermatocytes	Low region specificity	Detected in all
DAPK3	ZIP, ZIPK	ENSG00000167657	Death associated protein kinase 3	O43293	19	3958453-3971123	Enzymes, Predicted intracellular proteins, Predicted membrane proteins	Apoptosis, Transcription, Transcription regulation, Translation regulation	Activator, Chromatin regulator, Kinase, Serine/threonine-protein kinase, Transferase	Tumor suppressor	Evidence at protein level	Evidence at protein level	Evidence at protein level	Evidence at protein level	Low tissue specificity	Detected in all			Low cell type specificity	Detected in all			Low cell type specificity	Detected in all			Low cancer specificity	Detected in all			Low region specificity	Detected in all			Low immune cell specificity	Detected in all			Low lineage specificity	Detected in all			Low cancer specificity	Detected in all			Prostate - Smooth muscle cells	Low region specificity	Detected in all
DCC	IGDCC1, NTN1R1	ENSG00000187323	DCC netrin 1 receptor	P43146	18	52340197-53535903	Cancer-related genes, Disease related genes, Human disease related genes, Plasma proteins, Predicted intracellular proteins, Predicted membrane proteins	Apoptosis	Developmental protein, Receptor	Cancer-related genes, Disease variant, Intellectual disability, Tumor suppressor	Evidence at protein level	Evidence at protein level	Evidence at protein level	Evidence at protein level	Tissue enhanced	Detected in some		brain: 3.0;testis: 7.4	Cell type enhanced	Detected in some		Early spermatids: 178.1;Excitatory neurons: 423.6;Inhibitory neurons: 435.6;Late spermatids: 187.7;Oligodendrocyte precursor cells: 1225.4	Cell type enhanced	Detected in all		hippocampal CA4: 3187.4	Cancer enhanced	Detected in some		Glioblastoma Multiforme (TCGA): 1.6;Lung Squamous Cell Carcinoma (TCGA): 1.0	Low region specificity	Detected in many			Not detected in immune cells	Not detected			Not detected	Not detected			Group enriched	Detected in some	5	Bone cancer: 6.9;Myeloma: 23.2	Adrenal gland - Adrenal cortex cells, Spleen - Plasma cells, Testis - Early spermatids, Testis - Late spermatids, Thyroid gland - Plasma cells	Low region specificity	Detected in many
DCTN1		ENSG00000204843	Dynactin subunit 1	Q14203	2	74361154-74392087	Cancer-related genes, Disease related genes, Human disease related genes, Plasma proteins, Predicted intracellular proteins	Cell cycle, Cell division, Mitosis, Transport		Amyotrophic lateral sclerosis, Cancer-related genes, Neurodegeneration, Neuropathy, Parkinsonism	Evidence at protein level	Evidence at protein level	Evidence at protein level	Evidence at protein level	Low tissue specificity	Detected in all			Low cell type specificity	Detected in all			Low cell type specificity	Detected in all			Low cancer specificity	Detected in all			Low region specificity	Detected in all			Low immune cell specificity	Detected in all			Low lineage specificity	Detected in all			Low cancer specificity	Detected in all			Testis - Sertoli cells	Low region specificity	Detected in all
DCTN2	DCTN-50, RBP50	ENSG00000175203	Dynactin subunit 2	Q13561	12	57529633-57547224	Predicted intracellular proteins				Evidence at protein level	Evidence at protein level	Evidence at protein level	Evidence at protein level	Low tissue specificity	Detected in all			Low cell type specificity	Detected in all			Low cell type specificity	Detected in all			Low cancer specificity	Detected in all			Low region specificity	Detected in all			Low immune cell specificity	Detected in all			Low lineage specificity	Detected in all			Low cancer specificity	Detected in all			Colon - Smooth muscle cells, Testis - Early spermatids	Low region specificity	Detected in all
DDC	AADC	ENSG00000132437	Dopa decarboxylase	P20711	7	50458436-50565405	Disease related genes, Enzymes, FDA approved drug targets, Human disease related genes, Metabolic proteins, Predicted intracellular proteins	Catecholamine biosynthesis	Decarboxylase, Lyase	Disease variant, FDA approved drug targets	Evidence at protein level	Evidence at protein level	Evidence at protein level	Evidence at protein level	Tissue enhanced	Detected in many		intestine: 161.2;kidney: 303.6;retina: 170.3	Group enriched	Detected in some	4	Enteroendocrine cells: 368.3;Proximal enterocytes: 394.0;Proximal tubular cells: 315.4;Rod photoreceptor cells: 478.2	Cell type enhanced	Detected in single		splatter: 1.3	Low cancer specificity	Detected in many			Group enriched	Detected in many	9	midbrain: 179.5;pons: 59.8	Not detected in immune cells	Not detected			Not detected	Not detected			Cancer enhanced	Detected in many		Neuroblastoma: 108.9	Adrenal gland - Adrenal medulla cells, Colon - Colon enterocytes, Kidney - Proximal tubular cells, Liver - Hepatocytes, Skin - Sebaceous gland cells, Testis - Early spermatids, Thyroid gland - Parafollicular cells	Low region specificity	Detected in all
DDX59	DKFZP564B1023, ZNHIT5	ENSG00000118197	DEAD-box helicase 59	Q5T1V6	1	200623896-200669907	Disease related genes, Enzymes, Human disease related genes, Potential drug targets, Predicted intracellular proteins		Helicase, Hydrolase, RNA-binding	Ciliopathy, Disease variant	Evidence at protein level	Evidence at transcript level	Evidence at protein level	Evidence at protein level	Low tissue specificity	Detected in all			Low cell type specificity	Detected in many			Low cell type specificity	Detected in all			Low cancer specificity	Detected in all			Low region specificity	Detected in all			Low immune cell specificity	Detected in all			Low lineage specificity	Detected in all			Low cancer specificity	Detected in all				Low region specificity	Detected in all
DIS3L	DIS3L1, FLJ38088, KIAA1955, MGC4562	ENSG00000166938	DIS3 like exosome 3'-5' exoribonuclease	Q8TF46	15	66293217-66333898	Predicted intracellular proteins		Exonuclease, Hydrolase, Nuclease, RNA-binding		Evidence at protein level	Evidence at transcript level	Evidence at protein level	Evidence at protein level	Low tissue specificity	Detected in all			Low cell type specificity	Detected in many			Low cell type specificity	Detected in all			Low cancer specificity	Detected in all			Low region specificity	Detected in all			Low immune cell specificity	Detected in many			Low lineage specificity	Detected in all			Low cancer specificity	Detected in all			Adrenal gland - Adrenal cortex cells, Testis - Spermatocytes, Testis - Spermatogonia, Thyroid gland - Thyroid glandular cells	Low region specificity	Detected in all
DLG1	dJ1061C18.1.1, DLGH1, hdlg, SAP-97, SAP97	ENSG00000075711	Discs large MAGUK scaffold protein 1	Q12959	3	197042560-197299330	Predicted intracellular proteins, Transporters	Host-virus interaction			Evidence at protein level	Evidence at protein level	Evidence at protein level	Evidence at protein level	Low tissue specificity	Detected in all			Cell type enhanced	Detected in all		Excitatory neurons: 408.4;Oligodendrocytes: 1435.3	Cell type enhanced	Detected in all		committed oligodendrocyte precursor: 2251.0;oligodendrocyte: 2396.9	Low cancer specificity	Detected in all			Low region specificity	Detected in all			Low immune cell specificity	Detected in many			Low lineage specificity	Detected in many			Low cancer specificity	Detected in all			Thyroid gland - Thyroid glandular cells	Low region specificity	Detected in all
DNAAF2	C14orf104, CILD10, FLJ10563, KTU, PF13	ENSG00000165506	Dynein axonemal assembly factor 2	Q9NVR5	14	49625174-49635244	Disease related genes, Human disease related genes, Predicted intracellular proteins			Ciliopathy, Kartagener syndrome, Primary ciliary dyskinesia	Evidence at protein level	Evidence at protein level	Evidence at protein level	Evidence at protein level	Low tissue specificity	Detected in all			Low cell type specificity	Detected in all			Low cell type specificity	Detected in all			Low cancer specificity	Detected in all			Low region specificity	Detected in all			Low immune cell specificity	Detected in all			Low lineage specificity	Detected in all			Low cancer specificity	Detected in all			Adrenal gland - Adrenal cortex cells, Testis - Early spermatids, Testis - Spermatocytes	Low region specificity	Detected in all
DNAAF6	CXorf41, MGC35261, NYSAR97, PIH1D3, TWISTER	ENSG00000080572	Dynein axonemal assembly factor 6	Q9NQM4	X	107206611-107244247	Disease related genes, Human disease related genes, Predicted intracellular proteins			Ciliopathy, Disease variant, Kartagener syndrome, Primary ciliary dyskinesia	Evidence at protein level	Evidence at protein level	Evidence at protein level	Evidence at protein level	Group enriched	Detected in some	7	choroid plexus: 3.9;fallopian tube: 10.5;testis: 11.6	Group enriched	Detected in some	5	Ciliated cells: 68.3;Early spermatids: 225.6	Cell type enriched	Detected in some	8	ependymal cell: 45.9	Cancer enhanced	Detected in single		Uterine Corpus Endometrial Carcinoma (TCGA): 1.4	Low region specificity	Detected in all			Not detected in immune cells	Not detected			Not detected	Not detected			Not detected	Not detected			Lung - Respiratory ciliated cells, Testis - Early spermatids, Testis - Late spermatids	Low region specificity	Detected in single
DNAH14	C1orf67, DKFZp781B1548, Dnahc14, HL-18, HL18, MGC27277	ENSG00000185842	Dynein axonemal heavy chain 14	Q0VDD8	1	224896262-225399292	Predicted intracellular proteins		Motor protein		Evidence at protein level	Evidence at protein level	Evidence at transcript level	Evidence at protein level	Tissue enhanced	Detected in many		testis: 21.5	Cell type enhanced	Detected in many		Early spermatids: 156.5;Excitatory neurons: 63.2;Late spermatids: 51.9;Spermatocytes: 68.3	Low cell type specificity	Detected in all			Low cancer specificity	Detected in many			Low region specificity	Detected in all			Not detected in immune cells	Not detected			Not detected	Not detected			Low cancer specificity	Detected in many			Lung - Alveolar cells type 2, Testis - Early spermatids, Testis - Late spermatids	Low region specificity	Detected in many
DNAH2	DNHD3, FLJ46675, KIAA1503	ENSG00000183914	Dynein axonemal heavy chain 2	Q9P225	17	7717744-7833742	Disease related genes, Human disease related genes, Predicted intracellular proteins, Predicted membrane proteins		Motor protein	Disease variant	Evidence at protein level	Evidence at protein level	Evidence at protein level	Evidence at protein level	Tissue enhanced	Detected in some		fallopian tube: 12.6;parathyroid gland: 10.2;retina: 20.1	Group enriched	Detected in some	9	Ciliated cells: 41.5;Rod photoreceptor cells: 130.7	Cell type enriched	Detected in all	6	ependymal cell: 211.4	Low cancer specificity	Detected in many			Low region specificity	Detected in all			Not detected in immune cells	Not detected			Not detected	Not detected			Low cancer specificity	Detected in many			Liver - Hepatic stellate cells, Lung - Respiratory ciliated cells, Skin - Sebaceous gland cells, Testis - Early spermatids	Low region specificity	Detected in some
DNAH6	Dnahc6, DNHL1, FLJ37357, HL-2	ENSG00000115423	Dynein axonemal heavy chain 6	Q9C0G6	2	84516455-84819589	Plasma proteins, Predicted intracellular proteins		Motor protein		Evidence at protein level	Evidence at protein level	Evidence at transcript level	Evidence at protein level	Tissue enhanced	Detected in some		choroid plexus: 5.2;fallopian tube: 5.3	Cell type enhanced	Detected in many		Ciliated cells: 105.2;Early spermatids: 100.2;Excitatory neurons: 91.2;Inhibitory neurons: 26.8	Group enriched	Detected in all	4	choroid plexus epithelial cell: 779.6;ependymal cell: 1841.5	Not detected	Not detected			Low region specificity	Detected in all			Not detected in immune cells	Not detected			Not detected	Not detected			Not detected	Not detected			Liver - Hepatocytes, Lung - Respiratory ciliated cells, Testis - Early spermatids, Testis - Late spermatids	Low region specificity	Detected in many
DNAI1	CILD1, DIC1, PCD	ENSG00000122735	Dynein axonemal intermediate chain 1	Q9UI46	9	34457414-34520988	Disease related genes, Human disease related genes, Plasma proteins, Predicted intracellular proteins	Cilium biogenesis/degradation	Motor protein	Ciliopathy, Disease variant, Kartagener syndrome, Primary ciliary dyskinesia	Evidence at protein level	Evidence at protein level	Evidence at protein level	Evidence at protein level	Group enriched	Detected in some	5	choroid plexus: 67.4;fallopian tube: 32.8;testis: 32.6	Cell type enhanced	Detected in some		Ciliated cells: 88.3;Early spermatids: 35.2;Inhibitory neurons: 15.7;Ionocytes: 14.4;Late spermatids: 32.5;Spermatocytes: 45.4	Group enriched	Detected in many	9	choroid plexus epithelial cell: 228.9;ependymal cell: 610.4	Cancer enhanced	Detected in some		Uterine Corpus Endometrial Carcinoma (TCGA): 6.8	Region enhanced	Detected in all		choroid plexus: 59.0	Not detected in immune cells	Not detected			Not detected	Not detected			Cancer enhanced	Detected in single		breast cancer: 1.2	Adrenal gland - Adrenal medulla cells, Breast - Breast glandular cells, Lung - Respiratory ciliated cells, Pancreas - Alpha cells, Pancreas - Beta cells, Pituitary gland - Somatotropes, Testis - Early spermatids	Low region specificity	Detected in many
DNAJA4	PRO1472	ENSG00000140403	DnaJ heat shock protein family (Hsp40) member A4	Q8WW22	15	78264086-78282196	Predicted intracellular proteins		Chaperone		Evidence at protein level	Evidence at protein level	Evidence at protein level	Evidence at protein level	Tissue enhanced	Detected in all		tongue: 139.1	Cell type enriched	Detected in many	4	Late spermatids: 1661.4	Low cell type specificity	Detected in all			Low cancer specificity	Detected in all			Low region specificity	Detected in all			Low immune cell specificity	Detected in some			Low lineage specificity	Detected in many			Low cancer specificity	Detected in many			Lung - Respiratory ciliated cells, Skin - Keratinocyte (other), Testis - Late spermatids	Low region specificity	Detected in all
DNAJB13	RSPH16A, TSARG6	ENSG00000187726	DnaJ heat shock protein family (Hsp40) member B13	P59910	11	73951026-73970366	Disease related genes, Human disease related genes, Predicted intracellular proteins	Cilium biogenesis/degradation	Chaperone	Ciliopathy, Disease variant, Primary ciliary dyskinesia	Evidence at protein level	Evidence at protein level	Evidence at protein level	Evidence at protein level	Group enriched	Detected in many	6	choroid plexus: 26.1;fallopian tube: 51.5;testis: 18.3	Cell type enhanced	Detected in some		Ciliated cells: 106.9;Early spermatids: 93.1;Ionocytes: 22.1;Late spermatids: 67.8;Oocytes: 44.1;Secretory cells: 22.3	Group enriched	Detected in many	23	choroid plexus epithelial cell: 40.5;ependymal cell: 113.2	Cancer enhanced	Detected in many		Ovary Serous Cystadenocarcinoma (TCGA): 17.3;Uterine Corpus Endometrial Carcinoma (TCGA): 19.2	Region enhanced	Detected in all		choroid plexus: 23.9	Not detected in immune cells	Not detected			Not detected	Not detected			Low cancer specificity	Detected in many			Lung - Respiratory ciliated cells, Testis - Early spermatids, Testis - Late spermatids	Low region specificity	Detected in single
DNAL1	1700010H15RiK, C14orf168, CILD16, MGC12435	ENSG00000119661	Dynein axonemal light chain 1	Q4LDG9	14	73644875-73703732	Disease related genes, Human disease related genes, Predicted intracellular proteins		Motor protein	Ciliopathy, Disease variant, Kartagener syndrome, Primary ciliary dyskinesia	Evidence at protein level	Evidence at protein level	Evidence at protein level	Evidence at protein level	Tissue enhanced	Detected in all		testis: 53.0	Cell type enhanced	Detected in all		Ciliated cells: 111.7;Cone photoreceptor cells: 88.4;Early spermatids: 462.2;Spermatocytes: 163.8	Cell type enhanced	Detected in all		ependymal cell: 144.0	Low cancer specificity	Detected in all			Low region specificity	Detected in all			Low immune cell specificity	Detected in all			Low lineage specificity	Detected in all			Low cancer specificity	Detected in all			Lung - Respiratory ciliated cells, Spleen - Endothelial cells, Testis - Early spermatids	Low region specificity	Detected in all
DNAL4	dJ327J16, PIG27	ENSG00000100246	Dynein axonemal light chain 4	O96015	22	38778508-38794198	Disease related genes, Human disease related genes, Predicted intracellular proteins		Motor protein		Evidence at protein level	Evidence at transcript level	Evidence at protein level	Evidence at protein level	Low tissue specificity	Detected in all			Cell type enhanced	Detected in all		Early spermatids: 154.8;Late spermatids: 200.7;Spermatocytes: 67.4	Not detected	Not detected			Low cancer specificity	Detected in all			Low region specificity	Detected in all			Low immune cell specificity	Detected in all			Low lineage specificity	Detected in all			Low cancer specificity	Detected in all			Testis - Early spermatids, Testis - Late spermatids, Thyroid gland - Thyroid glandular cells
DNALI1	dJ423B22.5, hp28, P28	ENSG00000163879	Dynein axonemal light intermediate chain 1	O14645	1	37556919-37566857	Predicted intracellular proteins		Motor protein		Evidence at protein level	Evidence at protein level	Evidence at protein level	Evidence at protein level	Tissue enhanced	Detected in many		choroid plexus: 77.1;fallopian tube: 52.7	Group enriched	Detected in many	5	Ciliated cells: 359.7;Early spermatids: 556.9;Late spermatids: 1073.4	Group enriched	Detected in many	5	choroid plexus epithelial cell: 70.6;ependymal cell: 177.9	Low cancer specificity	Detected in many			Low region specificity	Detected in all			Not detected in immune cells	Not detected			Not detected	Not detected			Cancer enhanced	Detected in many		Bile duct cancer: 8.1	Lung - Respiratory ciliated cells, Minor Salivary Gland - Minor salivary glandular cells, Prostate - Prostate glandular cells, Testis - Early spermatids, Testis - Late spermatids	Low region specificity	Detected in many
DPCD	DKFZP566F084, RP11-529I10.4	ENSG00000166171	Deleted in primary ciliary dyskinesia homolog (mouse)	Q9BVM2	10	101570560-101609662	Predicted intracellular proteins				Evidence at protein level	Evidence at protein level	Evidence at protein level	Evidence at protein level	Tissue enhanced	Detected in all		choroid plexus: 146.0;testis: 128.7	Cell type enhanced	Detected in many		Ciliated cells: 249.8;Early spermatids: 610.0;Late spermatids: 1068.0;Spermatocytes: 267.6	Low cell type specificity	Detected in all			Low cancer specificity	Detected in all			Low region specificity	Detected in all			Group enriched	Detected in many	5	classical monocyte: 20.3;intermediate monocyte: 22.3;myeloid DC: 29.7;non-classical monocyte: 9.5	Group enriched	Detected in all	14	dendritic cells: 29.7;monocytes: 22.3	Low cancer specificity	Detected in all			Adipose subcutaneous - Adipose progenitor cells, Liver - Vascular Endothelial cells, Lung - Respiratory ciliated cells, Pituitary gland - Somatotropes, Skin - Outer root sheath cells, Testis - Early spermatids, Testis - Late spermatids, Thyroid gland - Thyroid glandular cells	Low region specificity	Detected in all
DPYSL2	CRMP2, DHPRP2, DRP-2, DRP2	ENSG00000092964	Dihydropyrimidinase like 2	Q16555	8	26514031-26658178	Metabolic proteins, Plasma proteins, Predicted intracellular proteins	Differentiation, Neurogenesis	Developmental protein		Evidence at protein level	Evidence at protein level	Evidence at protein level	Evidence at protein level	Tissue enhanced	Detected in all		brain: 242.5	Cell type enhanced	Detected in many		Adipocytes: 377.8;Oligodendrocytes: 341.8	Low cell type specificity	Detected in all			Cancer enhanced	Detected in all		Glioblastoma Multiforme (TCGA): 175.6	Low region specificity	Detected in all			Group enriched	Detected in many	5	classical monocyte: 65.8;intermediate monocyte: 74.5;myeloid DC: 71.2;non-classical monocyte: 49.0;plasmacytoid DC: 42.3	Group enriched	Detected in all	5	dendritic cells: 71.2;monocytes: 74.5	Low cancer specificity	Detected in all			Adipose visceral - Adipose progenitor cells, Prostate - Fibroblasts	Low region specificity	Detected in all
DRC1	C2orf39, CCDC164, CILD21, FLJ32660, MGC16372	ENSG00000157856	Dynein regulatory complex subunit 1	Q96MC2	2	26401920-26456711	Disease related genes, Human disease related genes, Predicted intracellular proteins			Ciliopathy, Disease variant, Primary ciliary dyskinesia	Evidence at protein level	Evidence at transcript level	Evidence at transcript level	Evidence at protein level	Group enriched	Detected in some	6	choroid plexus: 23.7;fallopian tube: 38.0;testis: 20.2	Group enriched	Detected in some	5	Ciliated cells: 122.4;Early spermatids: 110.6;Late spermatids: 326.5	Group enriched	Detected in many	13	choroid plexus epithelial cell: 151.4;ependymal cell: 321.6	Cancer enhanced	Detected in some		Uterine Corpus Endometrial Carcinoma (TCGA): 5.3	Low region specificity	Detected in all			Immune cell enriched	Detected in single	89	neutrophil: 8.9	Lineage enriched	Detected in single	89	granulocytes: 8.9	Cancer enhanced	Detected in single		Bile duct cancer: 2.9	Colon - Enteric glia cells, Lung - Respiratory ciliated cells, Testis - Early spermatids, Testis - Late spermatids	Low region specificity	Detected in all
DVL3	KIAA0208	ENSG00000161202	Dishevelled segment polarity protein 3	Q92997	3	184155377-184173614	Cancer-related genes, Disease related genes, Human disease related genes, Predicted intracellular proteins	Wnt signaling pathway	Developmental protein	Cancer-related genes, Dwarfism	Evidence at protein level	Evidence at protein level	Evidence at protein level	Evidence at protein level	Low tissue specificity	Detected in all			Low cell type specificity	Detected in all			Low cell type specificity	Detected in all			Low cancer specificity	Detected in all			Low region specificity	Detected in all			Low immune cell specificity	Detected in some			Low lineage specificity	Detected in many			Low cancer specificity	Detected in all				Low region specificity	Detected in all
DYNC2I1	CFAP163, DIC6, FAP163, FLJ10300, WDR60	ENSG00000126870	Dynein 2 intermediate chain 1	Q8WVS4	7	158856558-158956747	Disease related genes, Human disease related genes, Potential drug targets, Predicted intracellular proteins, Transporters	Cilium biogenesis/degradation		Ciliopathy, Disease variant	Evidence at protein level	Evidence at protein level	Evidence at protein level	Evidence at protein level	Low tissue specificity	Detected in all			Cell type enhanced	Detected in all		Early spermatids: 750.5;Spermatocytes: 274.1	Low cell type specificity	Detected in all			Low cancer specificity	Detected in all			Low region specificity	Detected in all			Low immune cell specificity	Detected in all			Low lineage specificity	Detected in all			Low cancer specificity	Detected in all			Spleen - Endothelial cells, Testis - Early spermatids	Low region specificity	Detected in all
DYNC2I2	bA216B9.3, CFAP133, DIC5, FAP133, MGC20486, WDR34	ENSG00000119333	Dynein 2 intermediate chain 2	Q96EX3	9	128633653-128656847	Disease related genes, Human disease related genes, Predicted intracellular proteins			Ciliopathy, Disease variant	Evidence at protein level	Evidence at protein level	Evidence at protein level	Evidence at protein level	Low tissue specificity	Detected in all			Cell type enhanced	Detected in many		Late spermatids: 217.8;Proximal enterocytes: 157.3	Cell type enhanced	Detected in many		choroid plexus epithelial cell: 37.9;ependymal cell: 40.8	Low cancer specificity	Detected in all			Low region specificity	Detected in all			Group enriched	Detected in many	4	memory B-cell: 35.9;naive B-cell: 53.2	Lineage enriched	Detected in all	5	B-cells: 53.2	Low cancer specificity	Detected in all			Stomach - Mitotic cells (Stomach), Testis - Early spermatids, Testis - Late spermatids	Low region specificity	Detected in all
DYNC2LI1	CGI-60, D2LIC, DKFZP564A033, LIC3	ENSG00000138036	Dynein cytoplasmic 2 light intermediate chain 1	Q8TCX1	2	43774039-43810010	Disease related genes, Human disease related genes, Predicted intracellular proteins	Cilium biogenesis/degradation	Developmental protein, Motor protein	Ciliopathy, Disease variant	Evidence at protein level	Evidence at protein level	Evidence at protein level	Evidence at protein level	Low tissue specificity	Detected in all			Cell type enhanced	Detected in all		Early spermatids: 284.0	Low cell type specificity	Detected in all			Cancer enhanced	Detected in all		Kidney Renal Papillary Cell Carcinoma (TCGA): 75.3	Low region specificity	Detected in all			Immune cell enhanced	Detected in many		basophil: 15.2	Low lineage specificity	Detected in all			Low cancer specificity	Detected in all			Spleen - Endothelial cells, Testis - Early spermatids	Low region specificity	Detected in all
DYNLT2B	MGC33212, TCTEX1D2	ENSG00000213123	Dynein light chain Tctex-type 2B	Q8WW35	3	196291219-196318299	Disease related genes, Human disease related genes, Predicted intracellular proteins			Ciliopathy, Disease variant	Evidence at protein level	Evidence at transcript level	Evidence at protein level	Evidence at protein level	Low tissue specificity	Detected in all			Cell type enhanced	Detected in many		Ciliated cells: 311.0;Early spermatids: 212.0;Spermatocytes: 337.5	Cell type enhanced	Detected in all		ependymal cell: 29.5	Low cancer specificity	Detected in all			Low region specificity	Detected in all			Low immune cell specificity	Detected in many			Group enriched	Detected in all	5	B-cells: 22.0;dendritic cells: 16.2;T-cells: 25.2	Low cancer specificity	Detected in all			Adrenal gland - Mitotic cells (Adrenal gland), Lung - Respiratory ciliated cells, Testis - Early spermatids, Thyroid gland - Thyroid glandular cells	Low region specificity	Detected in all
DZIP1	DZIP, KIAA0996	ENSG00000134874	DAZ interacting zinc finger protein 1	Q86YF9	13	95578202-95644706	Disease related genes, Human disease related genes, Predicted intracellular proteins	Cilium biogenesis/degradation, Differentiation, Spermatogenesis	Developmental protein	Disease variant	Evidence at protein level	Evidence at protein level	Evidence at protein level	Evidence at protein level	Tissue enhanced	Detected in many		brain: 26.7	Cell type enhanced	Detected in many		Early spermatids: 371.8;Late spermatids: 765.6;Spermatocytes: 187.7	Low cell type specificity	Detected in all			Low cancer specificity	Detected in many			Low region specificity	Detected in all			Not detected in immune cells	Not detected			Not detected	Not detected			Cancer enhanced	Detected in many		testis cancer: 20.6	Breast - Fibroblasts, Heart muscle - Fibroblasts, Liver - Hepatic stellate cells, Prostate - Fibroblasts, Skeletal muscle - Fibroblasts, Spleen - Fibroblast_1, Testis - Early spermatids, Thyroid gland - Fibroblasts	Low region specificity	Detected in all
DZIP1L	DZIP2, FLJ32844	ENSG00000158163	DAZ interacting zinc finger protein 1 like	Q8IYY4	3	138061990-138115818	Disease related genes, Human disease related genes, Predicted intracellular proteins			Ciliopathy, Disease variant	Evidence at protein level	Evidence at transcript level	Evidence at protein level	Evidence at protein level	Low tissue specificity	Detected in many			Cell type enhanced	Detected in many		Ciliated cells: 63.3;Early spermatids: 16.3;Rod photoreceptor cells: 22.5	Cell type enhanced	Detected in many		ependymal cell: 113.0	Low cancer specificity	Detected in many			Low region specificity	Detected in all			Not detected in immune cells	Not detected			Not detected	Not detected			Low cancer specificity	Detected in many			Adipose subcutaneous - Adipose progenitor cells, Adipose visceral - Adipose progenitor cells, Lung - Respiratory ciliated cells, Testis - Late spermatids	Low region specificity	Detected in all
EFCAB7	KIAA1799, RP4-534K7.1	ENSG00000203965	EF-hand calcium binding domain 7	A8K855	1	63523372-63572693	Predicted intracellular proteins				Evidence at protein level	Evidence at protein level	Evidence at protein level	Evidence at protein level	Low tissue specificity	Detected in all			Cell type enhanced	Detected in many		Early spermatids: 77.9;Excitatory neurons: 56.9;Inhibitory neurons: 45.7;Skeletal myocytes: 101.5;Spermatocytes: 66.4	Low cell type specificity	Detected in all			Low cancer specificity	Detected in all			Low region specificity	Detected in all			Immune cell enhanced	Detected in many		basophil: 10.1	Low lineage specificity	Detected in all			Low cancer specificity	Detected in all			Testis - Early spermatids	Low region specificity	Detected in all
EGFR	ERBB, ERBB1, ERRP	ENSG00000146648	Epidermal growth factor receptor	P00533	7	55019017-55211628	Cancer-related genes, Disease related genes, Enzymes, FDA approved drug targets, Human disease related genes, Metabolic proteins, Plasma proteins, Predicted membrane proteins, Predicted secreted proteins, RAS pathway related proteins, Transporters	Host-virus interaction	Developmental protein, Host cell receptor for virus entry, Kinase, Receptor, Transferase, Tyrosine-protein kinase	Cancer-related genes, Disease variant, FDA approved drug targets, Proto-oncogene	Evidence at protein level	Evidence at protein level	Evidence at protein level	Evidence at protein level	Tissue enhanced	Detected in many		placenta: 63.5	Cell type enhanced	Detected in many		Cytotrophoblasts: 278.2;Salivary duct cells: 235.0;Syncytiotrophoblasts: 428.1	Cell type enhanced	Detected in many		astrocyte: 363.8;bergmann glia: 419.5	Cancer enriched	Detected in all	4	Glioblastoma Multiforme (TCGA): 265.7	Low region specificity	Detected in all			Not detected in immune cells	Not detected			Not detected	Not detected			Low cancer specificity	Detected in many			Heart muscle - Fibroblasts, Prostate - Prostate basal glandular cells	Low region specificity	Detected in all
EHD1	FLJ42622, FLJ44618, H-PAST, HPAST1, PAST1	ENSG00000110047	EH domain containing 1	Q9H4M9	11	64851642-64888296	Plasma proteins, Predicted intracellular proteins, Transporters	Cilium biogenesis/degradation, Protein transport, Transport			Evidence at protein level	Evidence at protein level	Evidence at protein level	Evidence at protein level	Tissue enhanced	Detected in all		bone marrow: 149.7;testis: 155.5	Group enriched	Detected in many	5	Early spermatids: 624.5;Late spermatids: 2051.5	Cell type enhanced	Detected in all		leukocyte: 56.0	Low cancer specificity	Detected in all			Low region specificity	Detected in all			Low immune cell specificity	Detected in all			Low lineage specificity	Detected in all			Low cancer specificity	Detected in all			Adrenal gland - Adrenal cortex cells, Testis - Late spermatids	Low region specificity	Detected in all
EHD2	PAST2	ENSG00000024422	EH domain containing 2	Q9NZN4	19	47713422-47743134	Predicted intracellular proteins		Hydrolase		Evidence at protein level	Evidence at protein level	Evidence at protein level	Evidence at protein level	Low tissue specificity	Detected in many			Cell type enhanced	Detected in many		Adipocytes: 148.5;Alveolar cells type 1: 231.5;Leydig cells: 94.8;Lymphatic endothelial cells: 118.4;Peritubular cells: 95.2;Sertoli cells: 100.6;Smooth muscle cells: 146.2	Group enriched	Detected in many	5	pericyte: 142.0;vascular associated smooth muscle cell: 126.6	Low cancer specificity	Detected in all			Low region specificity	Detected in all			Not detected in immune cells	Not detected			Not detected	Not detected			Low cancer specificity	Detected in many			Adrenal gland - Adrenal cortex cells, Colon - Smooth muscle cells, Minor Salivary Gland - Endothelial cells, Prostate - Smooth muscle cells	Low region specificity	Detected in all
EHD3	PAST3	ENSG00000013016	EH domain containing 3	Q9NZN3	2	31234152-31269451	Plasma proteins, Predicted intracellular proteins	Cilium biogenesis/degradation, Protein transport, Transport			Evidence at protein level	Evidence at protein level	Evidence at protein level	Evidence at protein level	Tissue enhanced	Detected in all		brain: 43.9;esophagus: 42.7	Cell type enhanced	Detected in many		Endothelial cells: 33.1;Kupffer cells: 28.9;Oligodendrocyte precursor cells: 21.2;Syncytiotrophoblasts: 46.7	Low cell type specificity	Detected in all			Low cancer specificity	Detected in all			Low region specificity	Detected in all			Group enriched	Detected in many	5	memory B-cell: 20.9;naive B-cell: 5.6	Lineage enriched	Detected in many	7	B-cells: 20.9	Low cancer specificity	Detected in many			Kidney - Podocytes, Liver - Sinusoid Endothelial cells	Low region specificity	Detected in all
EHD4	PAST4	ENSG00000103966	EH domain containing 4	Q9H223	15	41895933-41972557	Plasma proteins, Predicted intracellular proteins				Evidence at protein level	Evidence at protein level	Evidence at protein level	Evidence at protein level	Low tissue specificity	Detected in all			Cell type enhanced	Detected in many		Ionocytes: 153.9	Cell type enhanced	Detected in many		central nervous system macrophage: 50.4;endothelial cell: 61.1;oligodendrocyte precursor cell: 59.3	Low cancer specificity	Detected in all			Low region specificity	Detected in all			Low immune cell specificity	Detected in all			Low lineage specificity	Detected in all			Low cancer specificity	Detected in all			Colon - Endothelial cells, Kidney - Endothelial cells, Prostate - Endothelial cells, Skeletal muscle - Endothelial cells, Testis - Endothelial cells	Low region specificity	Detected in all
EML4	C2orf2, ELP120, ROPP120	ENSG00000143924	EMAP like 4	Q9HC35	2	42169353-42332548	Cancer-related genes, Disease related genes, Predicted intracellular proteins	Cell cycle, Cell division, Mitosis		Cancer-related genes	Evidence at protein level	Evidence at protein level	Evidence at protein level	Evidence at protein level	Low tissue specificity	Detected in all			Cell type enhanced	Detected in all		T-cells: 223.3	Cell type enhanced	Detected in all		central nervous system macrophage: 543.8;leukocyte: 709.2	Low cancer specificity	Detected in all			Low region specificity	Detected in all			Low immune cell specificity	Detected in all			Low lineage specificity	Detected in all			Cancer enhanced	Detected in all		Rhabdoid: 174.7	Skeletal muscle - Endothelial cells, Testis - Spermatogonia	Low region specificity	Detected in all
ENKD1	C16orf48, DKFZP434A1319, FBB11	ENSG00000124074	Enkurin domain containing 1	Q9H0I2	16	67662945-67667265	Predicted intracellular proteins	Cilium biogenesis/degradation			Evidence at protein level	Evidence at protein level	Evidence at protein level	Evidence at protein level	Low tissue specificity	Detected in all			Cell type enhanced	Detected in many		Ciliated cells: 44.6;Early spermatids: 30.9;Spermatocytes: 35.7	Cell type enhanced	Detected in all		ependymal cell: 35.8	Low cancer specificity	Detected in all			Low region specificity	Detected in all			Immune cell enhanced	Detected in single		plasmacytoid DC: 1.3	Low lineage specificity	Detected in single			Low cancer specificity	Detected in all			Lung - Respiratory ciliated cells	Low region specificity	Detected in all
ENSG00000198211		ENSG00000198211	Novel protein (MC1R-TUBB3 readthrough)		16	89919165-89936092	Predicted membrane proteins				Evidence at protein level	Evidence at protein level			Tissue enriched	Detected in single	11	testis: 6.4	Not detected	Not detected							Cancer enhanced	Detected in single		Skin Cuteneous Melanoma (TCGA): 2.4	Low region specificity	Detected in single			Not detected in immune cells	Not detected			Not detected	Not detected			Cancer enhanced	Detected in single		skin cancer: 1.9
ENSG00000251569		ENSG00000251569	Novel protein		2	169479480-169525922	Predicted intracellular proteins				Evidence at transcript level	Evidence at transcript level			Group enriched	Detected in many	5	retina: 17.4;testis: 8.3	Not detected	Not detected							Not detected	Not detected			Not detected	Not detected			Not detected in immune cells	Not detected			Not detected	Not detected			Cancer enhanced	Detected in single		skin cancer: 1.2
ENSG00000265118		ENSG00000265118	Novel protein		17	31305213-31318831	Predicted intracellular proteins, Predicted membrane proteins				Evidence at transcript level	Evidence at transcript level			Tissue enriched	Detected in some	4	lymphoid tissue: 8.2	Not detected	Not detected			Cell type enriched	Detected in single	5	oligodendrocyte: 4.1	Low cancer specificity	Detected in single			Low region specificity	Detected in all			Immune cell enhanced	Detected in all		neutrophil: 221.1	Low lineage specificity	Detected in all			Group enriched	Detected in some	4	Leukemia: 2.0;lymphoma: 2.0;Myeloma: 3.1
ENSG00000271254		ENSG00000271254			Unmapped	4612-29626	Predicted intracellular proteins				Evidence at protein level	Evidence at protein level			Low tissue specificity	Detected in all			Cell type enhanced	Detected in many		Early spermatids: 58.3;Spermatocytes: 182.5;Spermatogonia: 38.9	Low cell type specificity	Detected in all							Low region specificity	Detected in all			Low immune cell specificity	Detected in some			Low lineage specificity	Detected in many			Low cancer specificity	Detected in all
ENSG00000272772		ENSG00000272772	Novel protein		5	134157088-134225861	Predicted intracellular proteins				Evidence at protein level	Evidence at protein level			Low tissue specificity	Detected in many			Not detected	Not detected			Low cell type specificity	Detected in all			Cancer enhanced	Detected in some		Testicular Germ Cell Tumor (TCGA): 1.8	Low region specificity	Detected in all			Low immune cell specificity	Detected in all			Low lineage specificity	Detected in all			Low cancer specificity	Detected in all
ENSG00000272980		ENSG00000272980	Novel protein		6	166999336-167139138	Predicted intracellular proteins				Evidence at transcript level	Evidence at transcript level			Tissue enriched	Detected in many	7	testis: 23.0	Cell type enhanced	Detected in some		dendritic cells: 1.6;Horizontal cells: 1.3;Rod photoreceptor cells: 2.6									Low region specificity	Detected in single			Low immune cell specificity	Detected in many			Low lineage specificity	Detected in all			Low cancer specificity	Detected in all
ENSG00000280571		ENSG00000280571	Novel protein		3	42705756-42804518	Predicted intracellular proteins				Evidence at transcript level	Evidence at transcript level			Tissue enriched	Detected in single	9	retina: 7.4	Cell type enhanced	Detected in many		Basal squamous epithelial cells: 19.7;Erythroid cells: 15.0;Gastric mucus-secreting cells: 23.6;Plasma cells: 12.7;Squamous epithelial cells: 29.9	Low cell type specificity	Detected in all			Not detected	Not detected			Low region specificity	Detected in many			Not detected in immune cells	Not detected			Not detected	Not detected			Not detected	Not detected
ENSG00000285188		ENSG00000285188	Novel protein		19	18207961-18255419	Predicted intracellular proteins				Evidence at transcript level	Evidence at transcript level			Tissue enhanced	Detected in single		stomach 1: 2.7	Cell type enhanced	Detected in some		Adipocytes: 3.0;Alveolar cells type 2: 4.0;Breast myoepithelial cells: 4.6;Gastric mucus-secreting cells: 15.9;Sertoli cells: 2.7					Cancer enhanced	Detected in single		Thyroid Carcinoma (TCGA): 2.2	Not detected	Not detected			Not detected in immune cells	Not detected			Not detected	Not detected			Cancer enhanced	Detected in single		Gallbladder cancer: 1.1
ENSG00000285880		ENSG00000285880	ADRB3-GOT1L1 readthrough		8	37934340-37965953	Predicted membrane proteins				Evidence at transcript level	Evidence at transcript level			Not detected	Not detected			Cell type enhanced	Detected in some		Early spermatids: 4.1;Enteroendocrine cells: 1.1	Cell type enhanced	Detected in some		amygdala excitatory: 5.2;CGE interneuron: 4.4;LAMP5-LHX6 and Chandelier: 4.6	Not detected	Not detected			Low region specificity	Detected in all			Not detected in immune cells	Not detected			Not detected	Not detected			Not detected	Not detected
ENSG00000286185		ENSG00000286185	Novel protein, identical to neuroblastoma breakpoint family, member 19 NBPF19		1	149390623-149556361	Predicted intracellular proteins				Evidence at protein level	Evidence at protein level			Not detected	Not detected			Not detected	Not detected							Not detected	Not detected			Not detected	Not detected			Not detected in immune cells	Not detected			Not detected	Not detected			Not detected	Not detected
EPB41L3	4.1B, DAL1, KIAA0987	ENSG00000082397	Erythrocyte membrane protein band 4.1 like 3	Q9Y2J2	18	5392381-5630700	Plasma proteins, Predicted intracellular proteins, Predicted membrane proteins	Apoptosis	Actin-binding	Tumor suppressor	Evidence at protein level	Evidence at protein level	Evidence at protein level	Evidence at protein level	Low tissue specificity	Detected in all			Cell type enhanced	Detected in many		Excitatory neurons: 296.8;Inhibitory neurons: 228.0;Late spermatids: 302.0;monocytes: 188.0;Syncytiotrophoblasts: 252.8	Low cell type specificity	Detected in all			Low cancer specificity	Detected in many			Low region specificity	Detected in all			Immune cell enhanced	Detected in some		intermediate monocyte: 7.7;non-classical monocyte: 12.5	Lineage enriched	Detected in many	5	monocytes: 12.5	Low cancer specificity	Detected in many			Adipose subcutaneous - Macrophages, Kidney - Proximal tubular cells, Spleen - Macrophages, Testis - Early spermatids, Testis - Late spermatids	Low region specificity	Detected in all
EVC	DWF-1, EVC1	ENSG00000072840	EvC ciliary complex subunit 1	P57679	4	5711201-5814305	Disease related genes, Human disease related genes, Predicted membrane proteins			Ciliopathy, Disease variant, Dwarfism, Ectodermal dysplasia	Evidence at protein level	Evidence at protein level	Evidence at protein level	Evidence at protein level	Low tissue specificity	Detected in many			Cell type enhanced	Detected in many		Astrocytes: 25.1;Microglial cells: 9.8	Cell type enhanced	Detected in many		astrocyte: 30.8;fibroblast: 41.7	Cancer enhanced	Detected in all		Kidney Renal Papillary Cell Carcinoma (TCGA): 42.2	Low region specificity	Detected in all			Not detected in immune cells	Not detected			Not detected	Not detected			Low cancer specificity	Detected in many			Skeletal muscle - Fibroblasts	Low region specificity	Detected in all
EVI2A	EVDA, EVI2	ENSG00000126860	Ecotropic viral integration site 2A	P22794	17	31316410-31321749	Predicted membrane proteins			Proto-oncogene	Evidence at protein level	Evidence at protein level	Evidence at protein level	Evidence at protein level	Group enriched	Detected in many	4	brain: 163.9;lymphoid tissue: 102.3	Cell type enhanced	Detected in many		Hofbauer cells: 184.8;Kupffer cells: 207.8;Langerhans cells: 132.9;Macrophages: 107.0;NK-cells: 96.7;Oligodendrocytes: 203.7;T-cells: 111.0	Cell type enhanced	Detected in many		central nervous system macrophage: 24.2;oligodendrocyte: 95.4	Cancer enhanced	Detected in all		Glioblastoma Multiforme (TCGA): 29.5	Low region specificity	Detected in all			Low immune cell specificity	Detected in all			Low lineage specificity	Detected in all			Cancer enhanced	Detected in many		Leukemia: 30.0;Myeloma: 68.8	Adipose subcutaneous - Macrophages, Adrenal gland - Macrophages, Minor Salivary Gland - Macrophages, Skeletal muscle - Macrophages	Low region specificity	Detected in all
EXOC6	DKFZp761I2124, EXOC6A, FLJ1125, MGC33397, Sec15, SEC15L, SEC15L1	ENSG00000138190	Exocyst complex component 6	Q8TAG9	10	92826831-93059493	Plasma proteins, Predicted intracellular proteins, Transporters	Exocytosis, Protein transport, Transport			Evidence at protein level	Evidence at transcript level	Evidence at protein level	Evidence at protein level	Tissue enriched	Detected in all	4	retina: 159.1	Cell type enhanced	Detected in all		Excitatory neurons: 175.5;Microglial cells: 139.6;Oligodendrocyte precursor cells: 147.6;Rod photoreceptor cells: 153.6	Low cell type specificity	Detected in all			Low cancer specificity	Detected in all			Low region specificity	Detected in all			Immune cell enhanced	Detected in all		neutrophil: 30.7	Low lineage specificity	Detected in all			Low cancer specificity	Detected in all			Adipose subcutaneous - Endothelial cells, Adrenal gland - Adrenal cortex cells, Skeletal muscle - Skeletal myocytes, Thyroid gland - Thyroid glandular cells	Low region specificity	Detected in all
EXTL1	EXTL, MGC70794	ENSG00000158008	Exostosin like glycosyltransferase 1	Q92935	1	26019884-26036464	Enzymes, Metabolic proteins, Predicted intracellular proteins		Glycosyltransferase, Transferase		Evidence at protein level	Evidence at transcript level	Evidence at protein level	Evidence at protein level	Group enriched	Detected in many	7	brain: 31.6;skeletal muscle: 12.2;tongue: 28.6	Cell type enhanced	Detected in some		Bipolar cells: 11.8;Breast glandular cells: 8.5;Excitatory neurons: 22.0;Horizontal cells: 6.9;Melanocytes: 8.6;Oligodendrocyte precursor cells: 9.9	Low cell type specificity	Detected in many			Cancer enriched	Detected in some	14	Skin Cuteneous Melanoma (TCGA): 30.9	Low region specificity	Detected in all			Not detected in immune cells	Not detected			Not detected	Not detected			Group enriched	Detected in some	5	Rhabdoid: 8.6;skin cancer: 25.6	Heart muscle - Cardiomyocytes, Skeletal muscle - Skeletal myocytes, Skin - Eccrine sweat gland cells	Low region specificity	Detected in all
FAM149B1	KIAA0974	ENSG00000138286	Family with sequence similarity 149 member B1	Q96BN6	10	73168119-73244504	Disease related genes, Human disease related genes, Predicted intracellular proteins	Cilium biogenesis/degradation		Ciliopathy, Disease variant, Joubert syndrome	Evidence at protein level	Evidence at transcript level	Evidence at protein level	Evidence at protein level	Low tissue specificity	Detected in all			Cell type enhanced	Detected in many		Late spermatids: 27.5;Oligodendrocytes: 38.4	Low cell type specificity	Detected in all			Low cancer specificity	Detected in all			Low region specificity	Detected in all			Low immune cell specificity	Detected in single			Low lineage specificity	Detected in single			Low cancer specificity	Detected in all			Testis - Early spermatids	Low region specificity	Detected in all
FAM161A	FLJ13305, RP28	ENSG00000170264	FAM161 centrosomal protein A	Q3B820	2	61824848-61854143	Disease related genes, Human disease related genes, Predicted intracellular proteins	Cilium biogenesis/degradation, Sensory transduction, Vision		Ciliopathy, Disease variant, Retinitis pigmentosa	Evidence at protein level	Evidence at protein level	Evidence at protein level	Evidence at protein level	Tissue enriched	Detected in many	5	retina: 28.1	Cell type enhanced	Detected in many		Cone photoreceptor cells: 110.4;Early spermatids: 204.5;Late spermatids: 300.9;Rod photoreceptor cells: 368.7	Low cell type specificity	Detected in all			Low cancer specificity	Detected in many			Low region specificity	Detected in many			Not detected in immune cells	Not detected			Not detected	Not detected			Low cancer specificity	Detected in all			Testis - Early spermatids	Low region specificity	Detected in all
FAM184A	C6orf60, FLJ13942	ENSG00000111879	Family with sequence similarity 184 member A	Q8NB25	6	118959763-119149387	Predicted intracellular proteins				Evidence at protein level	Evidence at protein level	Evidence at protein level	Evidence at protein level	Tissue enhanced	Detected in many		placenta: 22.1	Cell type enhanced	Detected in many		Astrocytes: 247.7;Oligodendrocyte precursor cells: 83.0;Syncytiotrophoblasts: 258.0	Low cell type specificity	Detected in all			Low cancer specificity	Detected in many			Low region specificity	Detected in all			Not detected in immune cells	Not detected			Not detected	Not detected			Cancer enhanced	Detected in many		Neuroblastoma: 8.9	Liver - Hepatocytes, Testis - Early spermatids	Low region specificity	Detected in all
FAM186B	C12orf25, DKFZP434J0113	ENSG00000135436	Family with sequence similarity 186 member B	Q8IYM0	12	49582885-49605639	Predicted intracellular proteins				Evidence at protein level	Evidence at transcript level	Evidence at protein level	Evidence at protein level	Tissue enriched	Detected in some	28	testis: 44.7	Group enriched	Detected in some	26	Early spermatids: 88.1;Late spermatids: 98.2;Spermatocytes: 29.9	Low cell type specificity	Detected in many			Low cancer specificity	Detected in some			Low region specificity	Detected in all			Not detected in immune cells	Not detected			Not detected	Not detected			Low cancer specificity	Detected in many			Liver - Hepatocytes, Testis - Early spermatids, Testis - Late spermatids	Low region specificity	Detected in many
FAN1	KIAA1018, MTMR15	ENSG00000198690	FANCD2 and FANCI associated nuclease 1	Q9Y2M0	15	30890559-30943108	Disease related genes, Enzymes, Human disease related genes, Potential drug targets, Predicted intracellular proteins, Predicted membrane proteins	DNA damage, DNA repair	Endonuclease, Exonuclease, Hydrolase, Nuclease	Disease variant	Evidence at protein level	Evidence at protein level	Evidence at protein level	Evidence at protein level	Low tissue specificity	Detected in many			Low cell type specificity	Detected in all			Low cell type specificity	Detected in all			Low cancer specificity	Detected in all			Low region specificity	Detected in all			Low immune cell specificity	Detected in many			Low lineage specificity	Detected in many			Low cancer specificity	Detected in all			Testis - Early spermatids	Low region specificity	Detected in all
FBF1	ALB, FBF-1, FLJ00103, KIAA1863	ENSG00000188878	Fas binding factor 1	Q8TES7	17	75909574-75941140	Predicted intracellular proteins	Cilium biogenesis/degradation			Evidence at protein level	Evidence at protein level	Evidence at protein level	Evidence at protein level	Tissue enhanced	Detected in all		testis: 31.4	Cell type enhanced	Detected in many		Late spermatids: 39.5;Spermatocytes: 22.7	Low cell type specificity	Detected in all			Low cancer specificity	Detected in all			Low region specificity	Detected in all			Not detected in immune cells	Not detected			Not detected	Not detected			Low cancer specificity	Detected in all			Testis - Early spermatids, Testis - Late spermatids	Low region specificity	Detected in all
FBXO38	Fbx38, FLJ13962, MOKA, SP329	ENSG00000145868	F-box protein 38	Q6PIJ6	5	148383935-148442836	Disease related genes, Human disease related genes, Predicted intracellular proteins	Adaptive immunity, Immunity, Ubl conjugation pathway		Disease variant, Neurodegeneration, Neuropathy	Evidence at protein level	Evidence at protein level	Evidence at protein level	Evidence at protein level	Low tissue specificity	Detected in all			Low cell type specificity	Detected in all			Low cell type specificity	Detected in all			Low cancer specificity	Detected in all			Low region specificity	Detected in all			Low immune cell specificity	Detected in all			Low lineage specificity	Detected in all			Low cancer specificity	Detected in all			Testis - Spermatocytes, Testis - Spermatogonia	Low region specificity	Detected in all
FFAR4	GPR120, GPR129, O3FAR1, PGR4	ENSG00000186188	Free fatty acid receptor 4	Q5NUL3	10	93566665-93604480	FDA approved drug targets, G-protein coupled receptors, Human disease related genes, Predicted membrane proteins, Transporters	Differentiation, Inflammatory response	G-protein coupled receptor, Receptor, Transducer	FDA approved drug targets	Evidence at protein level	Evidence at protein level	Evidence at protein level	Evidence at protein level	Group enriched	Detected in some	5	adipose tissue: 3.9;intestine: 11.0;lung: 3.4;pituitary gland: 10.7	Cell type enhanced	Detected in some		Early spermatids: 30.4;Intestinal goblet cells: 81.8;Late spermatids: 19.1;Pancreatic endocrine cells: 22.1;Paneth cells: 12.9	Cell type enhanced	Detected in many		central nervous system macrophage: 36.7	Cancer enhanced	Detected in some		Colon Adenocarcinoma (TCGA): 6.1;Rectum Adenocarcinoma (TCGA): 4.6	Low region specificity	Detected in all			Not detected in immune cells	Not detected			Not detected	Not detected			Cancer enhanced	Detected in some		colorectal cancer: 4.3	Adipose subcutaneous - Adipocytes (Subcutaneous), Adipose visceral - Adipocytes (Visceral), Adrenal gland - Macrophages, Breast - Adipocytes (Breast), Colon - Colon enterocytes, Pituitary gland - Corticotropes, Testis - Late spermatids, Thyroid gland - Macrophages	Not detected	Not detected
FGFR1	BFGFR, CD331, CEK, FLG, FLT2, H2, H3, H4, H5, KAL2, N-SAM	ENSG00000077782	Fibroblast growth factor receptor 1	P11362	8	38400215-38468834	Cancer-related genes, CD markers, Disease related genes, Enzymes, FDA approved drug targets, Human disease related genes, Plasma proteins, Predicted intracellular proteins, Predicted membrane proteins, RAS pathway related proteins, Transporters	Transcription, Transcription regulation	Heparin-binding, Kinase, Receptor, Transferase, Tyrosine-protein kinase	Cancer-related genes, Craniosynostosis, Disease variant, Dwarfism, FDA approved drug targets, Holoprosencephaly, Hypogonadotropic hypogonadism, Intellectual disability, Kallmann syndrome	Evidence at protein level	Evidence at transcript level	Evidence at protein level	Evidence at protein level	Low tissue specificity	Detected in all			Cell type enhanced	Detected in many		Fibroblasts: 188.4;Leydig cells: 193.1;Oligodendrocyte precursor cells: 156.1	Low cell type specificity	Detected in all			Low cancer specificity	Detected in all			Low region specificity	Detected in all			Low immune cell specificity	Detected in some			Low lineage specificity	Detected in single			Cancer enhanced	Detected in all		Rhabdoid: 200.8	Breast - Fibroblasts, Kidney - Endothelial cells	Low region specificity	Detected in all
FHDC1	INF1, KIAA1727	ENSG00000137460	FH2 domain containing 1	Q9C0D6	4	152936323-152979671	Predicted intracellular proteins	Cilium biogenesis/degradation	Actin-binding		Evidence at protein level	Evidence at transcript level	Evidence at protein level	Evidence at protein level	Tissue enhanced	Detected in many		bone marrow: 14.5;parathyroid gland: 17.0;thyroid gland: 15.2	Cell type enhanced	Detected in many		Alveolar cells type 2: 47.3;Erythroid cells: 60.0;Syncytiotrophoblasts: 80.6	Cell type enhanced	Detected in many		medium spiny neuron: 39.4	Low cancer specificity	Detected in many			Low region specificity	Detected in all			Not detected in immune cells	Not detected			Not detected	Not detected			Low cancer specificity	Detected in many			Lung - Alveolar cells type 2, Testis - Early spermatids	Low region specificity	Detected in all
FKBP1A	FKBP-12, FKBP1, FKBP12, FKBP12C, PKC12, PPIASE	ENSG00000088832	FKBP prolyl isomerase 1A	P62942	20	1368977-1393164	Enzymes, FDA approved drug targets, Metabolic proteins, Plasma proteins, Predicted intracellular proteins, Predicted membrane proteins, Transporters		Isomerase, Rotamase	FDA approved drug targets	Evidence at protein level	Evidence at protein level	Evidence at protein level	Evidence at protein level	Low tissue specificity	Detected in all			Cell type enhanced	Detected in many		Paneth cells: 1139.6	Low cell type specificity	Detected in many			Low cancer specificity	Detected in all			Low region specificity	Detected in all			Low immune cell specificity	Detected in all			Group enriched	Detected in all	5	dendritic cells: 675.8;granulocytes: 976.4;monocytes: 1017.4	Low cancer specificity	Detected in all			Adrenal gland - Adrenal cortex cells, Breast - Endothelial cells, Colon - Endothelial cells, Kidney - Endothelial cells, Lung - Endothelial cells	Low region specificity	Detected in all
FKBP1B	FKBP12.6, FKBP1L, FKBP9, OTK4, PPIase	ENSG00000119782	FKBP prolyl isomerase 1B	P68106	2	24049701-24063681	Enzymes, Metabolic proteins, Predicted intracellular proteins		Isomerase, Rotamase		Evidence at protein level	Evidence at transcript level	Evidence at protein level	Evidence at protein level	Tissue enhanced	Detected in all		brain: 68.3	Low cell type specificity	Detected in many			Cell type enhanced	Detected in all		hippocampal CA4: 39.6	Low cancer specificity	Detected in many			Low region specificity	Detected in all			Immune cell enhanced	Detected in some		eosinophil: 2.2;T-reg: 2.8	Low lineage specificity	Detected in many			Cancer enhanced	Detected in many		testis cancer: 42.5		Low region specificity	Detected in all
FKBP1C	bA184C23.2	ENSG00000198225	FKBP prolyl isomerase family member 1C		6	63211446-63213024	Enzymes, Predicted intracellular proteins				Evidence at transcript level	Evidence at transcript level	No human protein/transcript evidence		Low tissue specificity	Detected in some			Cell type enhanced	Detected in some		Basal respiratory cells: 1.3;Mesothelial cells: 1.9	Not detected	Not detected			Not detected	Not detected			Not detected	Not detected			Low immune cell specificity	Detected in many			Group enriched	Detected in many	4	dendritic cells: 3.0;granulocytes: 4.4;monocytes: 5.1	Not detected	Not detected
FLT4	PCL, VEGFR-3, VEGFR3	ENSG00000037280	Fms related receptor tyrosine kinase 4	P35916	5	180601506-180649624	Cancer-related genes, Disease related genes, Enzymes, FDA approved drug targets, Human disease related genes, Plasma proteins, Predicted intracellular proteins, Predicted membrane proteins, Predicted secreted proteins, RAS pathway related proteins, Transporters	Angiogenesis	Kinase, Receptor, Transferase, Tyrosine-protein kinase	Cancer-related genes, Disease variant, FDA approved drug targets	Evidence at protein level	Evidence at transcript level	Evidence at protein level	Evidence at protein level	Low tissue specificity	Detected in many			Cell type enriched	Detected in some	4	Lymphatic endothelial cells: 193.6	Cell type enriched	Detected in some	8	endothelial cell: 32.6	Cancer enhanced	Detected in all		Kidney Renal Clear Cell Carcinoma (TCGA): 17.1	Low region specificity	Detected in all			Immune cell enriched	Detected in single	4	MAIT T-cell: 3.8	Lineage enriched	Detected in single	14	T-cells: 3.8	Low cancer specificity	Detected in many			Kidney - Endothelial cells, Liver - Vascular Endothelial cells, Minor Salivary Gland - Endothelial cells, Pancreas - Endothelial cells, Prostate - Endothelial cells, Skeletal muscle - Endothelial cells	Low region specificity	Detected in many
FSIP2	FLJ34780	ENSG00000188738	Fibrous sheath interacting protein 2	Q5CZC0	2	185738804-185833290	Disease related genes, Human disease related genes, Predicted intracellular proteins				Evidence at protein level	Evidence at transcript level	Evidence at transcript level	Evidence at protein level	Group enriched	Detected in some	5	intestine: 1.4;stomach 1: 2.5;testis: 5.2	Group enriched	Detected in many	4	Early spermatids: 390.7;Spermatocytes: 104.1	Low cell type specificity	Detected in many			Not detected	Not detected			Low region specificity	Detected in all			Not detected in immune cells	Not detected			Not detected	Not detected			Cancer enhanced	Detected in single		Gallbladder cancer: 1.2	Stomach - Gastric mucous cells, Testis - Early spermatids	Not detected	Not detected
FZD2		ENSG00000180340	Frizzled class receptor 2	Q14332	17	44557484-44561262	Cancer-related genes, Disease related genes, G-protein coupled receptors, Human disease related genes, Potential drug targets, Predicted membrane proteins	Wnt signaling pathway	Developmental protein, G-protein coupled receptor, Receptor, Transducer	Cancer-related genes, Disease variant	Evidence at protein level	Evidence at transcript level	Evidence at protein level	Evidence at protein level	Tissue enhanced	Detected in many		choroid plexus: 9.2	Cell type enhanced	Detected in many		Alveolar cells type 1: 20.0;Leydig cells: 40.8;Peritubular cells: 35.4	Cell type enhanced	Detected in some		central nervous system macrophage: 16.0;choroid plexus epithelial cell: 14.4;fibroblast: 24.3	Low cancer specificity	Detected in many			Region enriched	Detected in all	6	choroid plexus: 21.1	Immune cell enhanced	Detected in some		classical monocyte: 1.1;myeloid DC: 1.8	Group enriched	Detected in many	7	dendritic cells: 1.8;monocytes: 1.1	Low cancer specificity	Detected in all			Thyroid gland - Fibroblasts	Low region specificity	Detected in many
FZD4	CD344, EVR1	ENSG00000174804	Frizzled class receptor 4	Q9ULV1	11	86945679-86955395	CD markers, Disease related genes, G-protein coupled receptors, Human disease related genes, Potential drug targets, Predicted membrane proteins	Wnt signaling pathway	Developmental protein, G-protein coupled receptor, Receptor, Transducer	Disease variant	Evidence at protein level	Evidence at protein level	Evidence at protein level	Evidence at protein level	Tissue enhanced	Detected in many		adipose tissue: 115.9	Cell type enhanced	Detected in many		Adipocytes: 82.2;Basal prostatic cells: 29.7;Collecting duct cells: 27.2;Endothelial cells: 61.4;Fibroblasts: 32.6;Skeletal myocytes: 28.3;Smooth muscle cells: 27.3	Cell type enriched	Detected in many	4	endothelial cell: 83.6	Cancer enhanced	Detected in all		Kidney Renal Clear Cell Carcinoma (TCGA): 34.8	Low region specificity	Detected in all			Not detected in immune cells	Not detected			Not detected	Not detected			Low cancer specificity	Detected in many			Adipose subcutaneous - Adipocytes (Subcutaneous), Adipose visceral - Adipocytes (Visceral), Breast - Adipocytes (Breast), Prostate - Endothelial cells, Spleen - Endothelial cells	Low region specificity	Detected in all
FZD6	Hfz6	ENSG00000164930	Frizzled class receptor 6	O60353	8	103298433-103332866	Disease related genes, G-protein coupled receptors, Human disease related genes, Potential drug targets, Predicted membrane proteins	Wnt signaling pathway	Developmental protein, G-protein coupled receptor, Receptor, Transducer	Disease variant	Evidence at protein level	Evidence at protein level	Evidence at protein level	Evidence at protein level	Low tissue specificity	Detected in many			Cell type enhanced	Detected in many		Alveolar cells type 1: 95.4;Glandular and luminal cells: 69.3	Cell type enhanced	Detected in all		endothelial cell: 156.0	Low cancer specificity	Detected in all			Low region specificity	Detected in all			Immune cell enriched	Detected in single	4	NK-cell: 4.0	Lineage enriched	Detected in single	4	NK-cells: 4.0	Low cancer specificity	Detected in all			Adipose subcutaneous - Endothelial cells, Adrenal gland - Adrenal cortex cells, Heart muscle - Endothelial cells, Liver - Vascular Endothelial cells, Skeletal muscle - Endothelial cells, Stomach - Endothelial cells	Low region specificity	Detected in all
FZD8		ENSG00000177283	Frizzled class receptor 8	Q9H461	10	35638247-35642296	G-protein coupled receptors, Plasma proteins, Predicted membrane proteins	Wnt signaling pathway	Developmental protein, G-protein coupled receptor, Receptor, Transducer		Evidence at protein level	Evidence at protein level	Evidence at protein level	Evidence at protein level	Tissue enhanced	Detected in many		choroid plexus: 19.1	Cell type enhanced	Detected in many		Alveolar cells type 1: 41.9;Muller glia cells: 24.4	Cell type enhanced	Detected in many		choroid plexus epithelial cell: 23.1	Low cancer specificity	Detected in many			Region enriched	Detected in all	6	choroid plexus: 85.4	Not detected in immune cells	Not detected			Not detected	Not detected			Low cancer specificity	Detected in many			Adrenal gland - Fibroblasts, Spleen - Fibroblast_1	Low region specificity	Detected in many
GABARAPL1	APG8L, ATG8B, ATG8L, gec1	ENSG00000139112	GABA type A receptor associated protein like 1	Q9H0R8	12	10212458-10223128	Predicted intracellular proteins	Autophagy, Host-virus interaction			Evidence at protein level	Evidence at protein level	Evidence at protein level	Evidence at protein level	Low tissue specificity	Detected in all			Cell type enhanced	Detected in all		monocytes: 436.2;Syncytiotrophoblasts: 1071.9	Low cell type specificity	Detected in all			Cancer enhanced	Detected in all		Kidney Chromophobe (TCGA): 374.2	Low region specificity	Detected in all			Immune cell enhanced	Detected in many		neutrophil: 62.4	Group enriched	Detected in many	5	granulocytes: 62.4;NK-cells: 22.6;T-cells: 26.8	Cancer enriched	Detected in all	5	testis cancer: 513.0	Minor Salivary Gland - Minor salivary glandular cells	Low region specificity	Detected in all
GABBR1	GPRC3A, hGB1a	ENSG00000204681	Gamma-aminobutyric acid type B receptor subunit 1	Q9UBS5	6	29555629-29633976	FDA approved drug targets, G-protein coupled receptors, Plasma proteins, Predicted membrane proteins		G-protein coupled receptor, Receptor, Transducer	Disease variant, FDA approved drug targets, Intellectual disability	Evidence at protein level	Evidence at transcript level	Evidence at protein level	Evidence at protein level	Tissue enriched	Detected in many	5	brain: 228.8	Cell type enhanced	Detected in many		Astrocytes: 142.7;Excitatory neurons: 56.7;Horizontal cells: 56.0;Inhibitory neurons: 65.2;Oligodendrocyte precursor cells: 67.9	Low cell type specificity	Detected in all			Low cancer specificity	Detected in many			Low region specificity	Detected in all			Not detected in immune cells	Not detected			Not detected	Not detected			Low cancer specificity	Detected in many				Low region specificity	Detected in all
GAS8	DRC4, GAS11	ENSG00000141013	Growth arrest specific 8	O95995	16	90019629-90044975	Disease related genes, Human disease related genes, Plasma proteins, Predicted intracellular proteins			Ciliopathy, Primary ciliary dyskinesia	Evidence at protein level	Evidence at protein level	Evidence at protein level	Evidence at protein level	Low tissue specificity	Detected in all			Cell type enhanced	Detected in many		Ciliated cells: 61.9;Early spermatids: 133.8;Late spermatids: 307.1	Low cell type specificity	Detected in all			Low cancer specificity	Detected in all			Low region specificity	Detected in all			Low immune cell specificity	Detected in many			Low lineage specificity	Detected in many			Low cancer specificity	Detected in all			Heart muscle - Cardiomyocytes, Lung - Respiratory ciliated cells, Minor Salivary Gland - Minor salivary glandular cells, Spleen - Endothelial cells, Testis - Early spermatids, Testis - Late spermatids	Low region specificity	Detected in all
GLI1	GLI	ENSG00000111087	GLI family zinc finger 1	P08151	12	57459785-57472268	Disease related genes, Human disease related genes, Predicted intracellular proteins, Transcription factors	Differentiation, Transcription, Transcription regulation	Activator, Developmental protein, DNA-binding	Disease variant, Proto-oncogene	Evidence at protein level	Evidence at protein level	Evidence at protein level	Evidence at protein level	Tissue enhanced	Detected in many		cervix: 10.7	Group enriched	Detected in some	5	Leydig cells: 34.4;Peritubular cells: 42.6;Sertoli cells: 13.6	Cell type enriched	Detected in some	5	bergmann glia: 41.3	Cancer enhanced	Detected in many		Testicular Germ Cell Tumor (TCGA): 12.2	Low region specificity	Detected in many			Immune cell enhanced	Detected in single		neutrophil: 1.9	Lineage enriched	Detected in single	6	granulocytes: 1.9	Group enriched	Detected in many	6	Bone cancer: 31.1;Brain cancer: 7.8;Rhabdoid: 22.1;Sarcoma: 12.5	Kidney - Fibroblasts, Thyroid gland - Fibroblasts	Low region specificity	Detected in many
GLI2	HPE9, THP1, THP2	ENSG00000074047	GLI family zinc finger 2	P10070	2	120735623-120992653	Disease related genes, Human disease related genes, Predicted intracellular proteins, Transcription factors	Transcription, Transcription regulation	Activator, Developmental protein, DNA-binding, Repressor	Disease variant, Holoprosencephaly	Evidence at protein level	Evidence at protein level	Evidence at protein level	Evidence at protein level	Tissue enhanced	Detected in many		ovary: 10.6	Cell type enhanced	Detected in some		Astrocytes: 37.5;Leydig cells: 24.6;Ovarian stromal cells: 11.7;Peritubular cells: 29.1	Group enriched	Detected in many	4	astrocyte: 104.4;bergmann glia: 181.7;ependymal cell: 65.9;fibroblast: 57.7	Cancer enhanced	Detected in many		Testicular Germ Cell Tumor (TCGA): 6.3	Low region specificity	Detected in all			Not detected in immune cells	Not detected			Not detected	Not detected			Low cancer specificity	Detected in many			Adipose subcutaneous - Adipose progenitor cells, Heart muscle - Fibroblasts, Kidney - Fibroblasts, Prostate - Fibroblasts, Spleen - Fibroblast_1, Thyroid gland - Fibroblasts	Low region specificity	Detected in many
GLIS2	NPHP7	ENSG00000126603	GLIS family zinc finger 2	Q9BZE0	16	4314761-4339597	Disease related genes, Human disease related genes, Predicted intracellular proteins, Transcription factors	Differentiation, Neurogenesis, Transcription, Transcription regulation	Activator, Developmental protein, DNA-binding, Repressor	Ciliopathy, Nephronophthisis	Evidence at protein level	Evidence at protein level	Evidence at protein level	Evidence at protein level	Low tissue specificity	Detected in many			Cell type enhanced	Detected in many		Alveolar cells type 1: 39.2;Leydig cells: 22.6;Peritubular cells: 34.6	Low cell type specificity	Detected in many			Cancer enhanced	Detected in all		Kidney Renal Papillary Cell Carcinoma (TCGA): 26.9	Low region specificity	Detected in all			Not detected in immune cells	Not detected			Not detected	Not detected			Low cancer specificity	Detected in many			Heart muscle - Fibroblasts, Prostate - Fibroblasts, Spleen - Fibroblast_1	Low region specificity	Detected in all
GLIS3	MGC33662, ZNF515	ENSG00000107249	GLIS family zinc finger 3	Q8NEA6	9	3824127-4348392	Disease related genes, Human disease related genes, Predicted intracellular proteins, Transcription factors	Transcription, Transcription regulation	Activator, DNA-binding, Repressor	Congenital hypothyroidism, Diabetes mellitus	Evidence at protein level	Evidence at transcript level	Evidence at protein level	Evidence at protein level	Tissue enhanced	Detected in many		thyroid gland: 14.5	Cell type enriched	Detected in many	7	Astrocytes: 616.2	Group enriched	Detected in all	5	astrocyte: 1626.4;bergmann glia: 824.6;choroid plexus epithelial cell: 1289.9;ependymal cell: 1730.9	Low cancer specificity	Detected in many			Low region specificity	Detected in all			Not detected in immune cells	Not detected			Not detected	Not detected			Low cancer specificity	Detected in many			Adipose visceral - Adipose progenitor cells, Heart muscle - Fibroblasts, Minor Salivary Gland - Minor salivary glandular cells, Skin - Endothelial cells, Thyroid gland - Thyroid glandular cells	Low region specificity	Detected in many
GNAI1		ENSG00000127955	G protein subunit alpha i1	P63096	7	79768028-80226181	Cancer-related genes, Disease related genes, Plasma proteins, Predicted intracellular proteins	Cell cycle, Cell division, Host-virus interaction, Mitosis, Transport	Transducer	Cancer-related genes, Disease variant, Epilepsy, Intellectual disability	Evidence at protein level	Evidence at protein level	Evidence at protein level	Evidence at protein level	Tissue enhanced	Detected in many		brain: 101.5	Cell type enhanced	Detected in many		Melanocytes: 146.0;Oligodendrocytes: 382.4;Syncytiotrophoblasts: 187.9	Cell type enhanced	Detected in all		committed oligodendrocyte precursor: 494.9;oligodendrocyte: 625.4	Low cancer specificity	Detected in all			Low region specificity	Detected in all			Immune cell enriched	Detected in some	6	NK-cell: 12.8	Lineage enriched	Detected in many	6	NK-cells: 12.8	Low cancer specificity	Detected in many			Lung - Fibroblast_1, Minor Salivary Gland - Minor salivary gland basal cells, Skin - Keratinocyte (other)	Low region specificity	Detected in all
GNAI2	GIP, GNAI2B	ENSG00000114353	G protein subunit alpha i2	P04899	3	50226292-50259362	Human disease related genes, Predicted intracellular proteins	Cell cycle, Cell division	Transducer		Evidence at protein level	Evidence at protein level	Evidence at protein level	Evidence at protein level	Low tissue specificity	Detected in all			Cell type enhanced	Detected in all		Adipocytes: 613.9;monocytes: 1096.6	Cell type enhanced	Detected in all		endothelial cell: 265.0	Low cancer specificity	Detected in all			Low region specificity	Detected in all			Low immune cell specificity	Detected in all			Low lineage specificity	Detected in all			Low cancer specificity	Detected in all			Breast - Endothelial cells, Lung - Endothelial cells, Skeletal muscle - Endothelial cells	Low region specificity	Detected in all
GNAI3	87U6	ENSG00000065135	G protein subunit alpha i3	P08754	1	109548615-109600195	Disease related genes, Human disease related genes, Plasma proteins, Predicted intracellular proteins	Cell cycle, Cell division	Transducer	Disease variant	Evidence at protein level	Evidence at protein level	Evidence at protein level	Evidence at protein level	Low tissue specificity	Detected in all			Cell type enhanced	Detected in all		monocytes: 302.5	Low cell type specificity	Detected in all			Low cancer specificity	Detected in all			Low region specificity	Detected in all			Low immune cell specificity	Detected in all			Low lineage specificity	Detected in all			Low cancer specificity	Detected in all			Skin - Keratinocyte (other)	Low region specificity	Detected in all
GNAT3	GDCA, gustducin	ENSG00000214415	G protein subunit alpha transducin 3	A8MTJ3	7	80458635-80512064	Predicted intracellular proteins		Transducer		Evidence at protein level	Evidence at protein level	Evidence at transcript level	Evidence at protein level	Tissue enriched	Detected in single	6	intestine: 1.7	Cell type enhanced	Detected in single		Early spermatids: 2.8	Cell type enriched	Detected in some	14	deep-layer near-projecting: 15.0	Cancer enhanced	Detected in single		Bladder Urothelial Carcinoma (TCGA): 1.3	Not detected	Not detected			Not detected in immune cells	Not detected			Not detected	Not detected			Group enriched	Detected in some	4	colorectal cancer: 6.2;thyroid cancer: 5.5	Testis - Early spermatids, Testis - Late spermatids	Not detected	Not detected
GPATCH1	ECGP, FLJ10206, FLJ38686, GPATC1	ENSG00000076650	G-patch domain containing 1	Q9BRR8	19	33080899-33130542	Predicted intracellular proteins				Evidence at protein level	Evidence at protein level	Evidence at protein level	Evidence at protein level	Low tissue specificity	Detected in all			Cell type enhanced	Detected in many		Cone photoreceptor cells: 51.0	Low cell type specificity	Detected in all			Low cancer specificity	Detected in all			Low region specificity	Detected in all			Low immune cell specificity	Detected in all			Low lineage specificity	Detected in all			Low cancer specificity	Detected in all				Low region specificity	Detected in all
GPR161	RE2	ENSG00000143147	G protein-coupled receptor 161	Q8N6U8	1	168079542-168137667	Disease related genes, G-protein coupled receptors, Potential drug targets, Predicted membrane proteins, Transporters		Developmental protein, G-protein coupled receptor, Receptor, Transducer		Evidence at protein level	Evidence at transcript level	Evidence at protein level	Evidence at protein level	Tissue enhanced	Detected in many		endometrium 1: 40.1;smooth muscle: 26.5	Cell type enhanced	Detected in many		Endometrial stromal cells: 18.3;Horizontal cells: 44.1	Low cell type specificity	Detected in many			Low cancer specificity	Detected in many			Low region specificity	Detected in all			Not detected in immune cells	Not detected			Not detected	Not detected			Low cancer specificity	Detected in many			Adrenal gland - Fibroblasts, Kidney - Fibroblasts, Prostate - Smooth muscle cells, Skin - Outer root sheath cells, Spleen - Fibroblast_1	Low region specificity	Detected in many
GPR180	ITR	ENSG00000152749	G protein-coupled receptor 180	Q86V85	13	94601857-94634661	Predicted membrane proteins				Evidence at protein level	Evidence at transcript level	Evidence at transcript level	Evidence at protein level	Low tissue specificity	Detected in many			Cell type enhanced	Detected in many		Excitatory neurons: 46.0	Low cell type specificity	Detected in all			Low cancer specificity	Detected in all			Low region specificity	Detected in all			Low immune cell specificity	Detected in some			Low lineage specificity	Detected in single			Low cancer specificity	Detected in all			Adipose subcutaneous - Adipocytes (Subcutaneous), Adipose visceral - Adipocytes (Visceral)	Low region specificity	Detected in all
GPR83	GPR72	ENSG00000123901	G protein-coupled receptor 83	Q9NYM4	11	94377316-94401419	G-protein coupled receptors, Plasma proteins, Predicted membrane proteins		G-protein coupled receptor, Receptor, Transducer		Evidence at protein level	Evidence at transcript level	Evidence at protein level	Evidence at transcript level	Tissue enriched	Detected in some	5	brain: 15.4	Cell type enhanced	Detected in some		Ciliated cells: 1.1;Early spermatids: 1.0;Excitatory neurons: 2.5;Inhibitory neurons: 4.2	Cell type enhanced	Detected in many		MGE interneuron: 24.5	Low cancer specificity	Detected in single			Low region specificity	Detected in all			Not detected in immune cells	Not detected			Not detected	Not detected			Not detected	Not detected			Thyroid gland - Thyroid glandular cells	Region enhanced	Detected in many
GPRC5C	RAIG-3	ENSG00000170412	G protein-coupled receptor class C group 5 member C	Q9NQ84	17	74424851-74451653	G-protein coupled receptors, Predicted intracellular proteins, Predicted membrane proteins, Transporters		G-protein coupled receptor, Receptor, Transducer		Evidence at protein level	Evidence at protein level	Evidence at protein level	Evidence at protein level	Tissue enhanced	Detected in many		liver: 188.1;stomach 1: 224.0	Cell type enhanced	Detected in many		Gastric mucus-secreting cells: 139.7;Hepatocytes: 171.7;Ionocytes: 146.5;Paneth cells: 183.3;Secretory cells: 157.9	Group enriched	Detected in many	5	pericyte: 153.3;upper rhombic lip: 49.1;vascular associated smooth muscle cell: 160.1	Low cancer specificity	Detected in all			Low region specificity	Detected in all			Immune cell enhanced	Detected in some		plasmacytoid DC: 7.9	Group enriched	Detected in many	9	dendritic cells: 7.9;monocytes: 3.8	Low cancer specificity	Detected in all			Breast - Breast glandular cells, Thyroid gland - Thyroid glandular cells	Region enriched	Detected in all
GRB2	NCKAP2	ENSG00000177885	Growth factor receptor bound protein 2	P62993	17	75318076-75405709	Cancer-related genes, Plasma proteins, Predicted intracellular proteins, RAS pathway related proteins	Host-virus interaction		Cancer-related genes	Evidence at protein level	Evidence at protein level	Evidence at protein level	Evidence at protein level	Low tissue specificity	Detected in all			Cell type enhanced	Detected in all		Extravillous trophoblasts: 388.5;monocytes: 336.3	Cell type enhanced	Detected in all		central nervous system macrophage: 404.2	Low cancer specificity	Detected in all			Low region specificity	Detected in all			Low immune cell specificity	Detected in all			Low lineage specificity	Detected in all			Low cancer specificity	Detected in all			Adipose subcutaneous - Macrophages, Adipose visceral - Macrophages, Colon - Smooth muscle cells	Low region specificity	Detected in all
GRHL3	SOM, TFCP2L4	ENSG00000158055	Grainyhead like transcription factor 3	Q8TE85	1	24199558-24364482	Disease related genes, Human disease related genes, Predicted intracellular proteins, Transcription factors	Transcription, Transcription regulation	DNA-binding		Evidence at protein level	Evidence at protein level	Evidence at protein level	Evidence at protein level	Tissue enhanced	Detected in many		esophagus: 117.4;skin 1: 51.8;vagina: 46.3	Cell type enhanced	Detected in some		Basal keratinocytes: 27.5;Basal squamous epithelial cells: 30.1;Squamous epithelial cells: 125.2;Suprabasal keratinocytes: 108.5	Group enriched	Detected in some	4	astrocyte: 4.2;central nervous system macrophage: 1.9	Group enriched	Detected in many	8	Bladder Urothelial Carcinoma (TCGA): 43.5;Cervical Squamous Cell Carcinoma and Endocervical Adenocarcinoma (TCGA): 24.5;Head and Neck Squamous Cell Carcinoma (TCGA): 29.5;Lung Squamous Cell Carcinoma (TCGA): 15.6	Low region specificity	Detected in many			Not detected in immune cells	Not detected			Not detected	Not detected			Cancer enhanced	Detected in many		Gallbladder cancer: 37.7;testis cancer: 30.1	Adipose visceral - Mesothelial cells, Testis - Early spermatids	Low region specificity	Detected in single
GSTM1	GST1, H-B, MU	ENSG00000134184	Glutathione S-transferase mu 1	P09488	1	109687814-109709039	Cancer-related genes, Enzymes, Metabolic proteins, Plasma proteins, Predicted intracellular proteins	Lipid metabolism	Transferase	Cancer-related genes	Evidence at protein level	Evidence at protein level	Evidence at protein level	Evidence at protein level	Tissue enhanced	Detected in many		liver: 590.7	Cell type enhanced	Detected in many		granulocytes: 10.3;Melanocytes: 10.3;Mesothelial cells: 19.4	Cell type enhanced	Detected in some		bergmann glia: 2.4;choroid plexus epithelial cell: 1.0	Cancer enhanced	Detected in all		Bladder Urothelial Carcinoma (TCGA): 401.2	Low region specificity	Detected in all			Low immune cell specificity	Detected in all			Low lineage specificity	Detected in all			Low cancer specificity	Detected in many				Low region specificity	Detected in all
GSTM2	GST4	ENSG00000213366	Glutathione S-transferase mu 2	P28161	1	109668022-109709551	Enzymes, Metabolic proteins, Predicted intracellular proteins	Lipid metabolism	Transferase		Evidence at protein level	Evidence at protein level	Evidence at protein level	Evidence at protein level	Low tissue specificity	Detected in all			Cell type enhanced	Detected in many		Basal squamous epithelial cells: 22.2;granulocytes: 28.9;Plasma cells: 23.2;Squamous epithelial cells: 24.6	Cell type enhanced	Detected in many		astrocyte: 16.8	Low cancer specificity	Detected in all			Low region specificity	Detected in all			Low immune cell specificity	Detected in all			Low lineage specificity	Detected in all			Cancer enhanced	Detected in many		Bone cancer: 63.7	Thyroid gland - Fibroblasts	Low region specificity	Detected in all
GSTM3	GST5	ENSG00000134202	Glutathione S-transferase mu 3	P21266	1	109733932-109741038	Cancer-related genes, Enzymes, Metabolic proteins, Predicted intracellular proteins		Transferase	Cancer-related genes	Evidence at protein level	Evidence at protein level	Evidence at protein level	Evidence at protein level	Tissue enhanced	Detected in many		choroid plexus: 95.9	Cell type enhanced	Detected in all		Basal prostatic cells: 1150.9;Early spermatids: 2061.6;Late spermatids: 3952.1;Spermatocytes: 976.4	Cell type enhanced	Detected in all		choroid plexus epithelial cell: 155.4	Low cancer specificity	Detected in all			Low region specificity	Detected in all			Immune cell enhanced	Detected in some		naive CD4 T-cell: 2.4	Low lineage specificity	Detected in single			Low cancer specificity	Detected in many			Heart muscle - Cardiomyocytes, Testis - Early spermatids	Low region specificity	Detected in all
GSTM4		ENSG00000168765	Glutathione S-transferase mu 4	Q03013	1	109656099-109665496	Enzymes, Metabolic proteins, Predicted intracellular proteins	Lipid metabolism	Lyase, Transferase		Evidence at protein level	Evidence at protein level	Evidence at protein level	Evidence at protein level	Tissue enhanced	Detected in all		intestine: 132.2	Cell type enhanced	Detected in all		Proximal enterocytes: 406.9;Proximal tubular cells: 106.0	Low cell type specificity	Detected in all			Low cancer specificity	Detected in all			Low region specificity	Detected in all			Immune cell enriched	Detected in all	9	eosinophil: 343.9	Lineage enriched	Detected in all	9	granulocytes: 343.9	Low cancer specificity	Detected in all			Heart muscle - Cardiomyocytes, Liver - Hepatocytes	Low region specificity	Detected in all
GSTM5		ENSG00000134201	Glutathione S-transferase mu 5	P46439	1	109711780-109775428	Enzymes, Metabolic proteins, Predicted intracellular proteins		Transferase		Evidence at protein level	Evidence at protein level	Evidence at protein level	Evidence at protein level	Tissue enriched	Detected in many	6	breast: 906.5	Cell type enhanced	Detected in many		Fibroblasts: 53.7;granulocytes: 44.1;Leydig cells: 146.8;Muller glia cells: 197.1;Ovarian stromal cells: 156.5;Peritubular cells: 125.5	Group enriched	Detected in many	4	astrocyte: 21.0;bergmann glia: 38.4;choroid plexus epithelial cell: 20.6;fibroblast: 22.8	Cancer enhanced	Detected in many		Kidney Chromophobe (TCGA): 46.2	Low region specificity	Detected in all			Immune cell enriched	Detected in single	4	plasmacytoid DC: 3.9	Lineage enriched	Detected in single	4	dendritic cells: 3.9	Group enriched	Detected in some	10	Bone cancer: 2.8;head and neck cancer: 1.4	Kidney - Fibroblasts, Liver - Hepatic stellate cells, Minor Salivary Gland - Fibroblasts, Prostate - Fibroblasts, Skeletal muscle - Fibroblasts, Stomach - Fibroblasts, Thyroid gland - Fibroblasts
GUCA1B	GCAP2, RP48	ENSG00000112599	Guanylate cyclase activator 1B	Q9UMX6	6	42183284-42194956	Disease related genes, Human disease related genes, Potential drug targets, Predicted intracellular proteins, Transporters	Sensory transduction, Vision		Disease variant, Retinitis pigmentosa	Evidence at protein level	Evidence at protein level	Evidence at protein level	Evidence at protein level	Tissue enriched	Detected in many	102	retina: 451.8	Cell type enriched	Detected in many	4	Cone photoreceptor cells: 2227.6	Low cell type specificity	Detected in all			Low cancer specificity	Detected in some			Low region specificity	Detected in all			Not detected in immune cells	Not detected			Not detected	Not detected			Low cancer specificity	Detected in many				Low region specificity	Detected in single
HAUS3	C4orf15, dgt3, IT1, MGC4701	ENSG00000214367	HAUS augmin like complex subunit 3	Q68CZ6	4	2227464-2242133	Predicted intracellular proteins	Cell cycle, Cell division, Mitosis			Evidence at protein level	Evidence at transcript level	Evidence at protein level	Evidence at protein level	Low tissue specificity	Detected in all			Cell type enhanced	Detected in many		Spermatocytes: 36.9	Low cell type specificity	Detected in all			Low cancer specificity	Detected in all			Low region specificity	Detected in all			Low immune cell specificity	Detected in all			Low lineage specificity	Detected in all			Low cancer specificity	Detected in all				Low region specificity	Detected in all
HAUS7	UCHL5IP, UIP1	ENSG00000213397	HAUS augmin like complex subunit 7	Q99871	X	153447668-153495516	Plasma proteins, Predicted intracellular proteins	Cell cycle, Cell division, Mitosis			Evidence at protein level	Evidence at protein level	Evidence at protein level	Evidence at protein level	Low tissue specificity	Detected in all			Cell type enhanced	Detected in many		Astrocytes: 43.0;Oligodendrocyte precursor cells: 29.7;Oocytes: 24.3	Low cell type specificity	Detected in all			Low cancer specificity	Detected in all			Low region specificity	Detected in all			Low immune cell specificity	Detected in all			Low lineage specificity	Detected in all			Low cancer specificity	Detected in all				Low region specificity	Detected in all
HDAC6	FLJ16239, HD6, JM21, KIAA0901, PPP1R90	ENSG00000094631	Histone deacetylase 6	Q9UBN7	X	48801377-48824982	Disease related genes, Enzymes, FDA approved drug targets, Human disease related genes, Predicted intracellular proteins	Autophagy, Transcription, Transcription regulation	Actin-binding, Chromatin regulator, Hydrolase, Repressor	FDA approved drug targets	Evidence at protein level	Evidence at protein level	Evidence at protein level	Evidence at protein level	Low tissue specificity	Detected in all			Cell type enhanced	Detected in all		Spermatocytes: 90.2	Low cell type specificity	Detected in all			Low cancer specificity	Detected in all			Low region specificity	Detected in all			Low immune cell specificity	Detected in many			Low lineage specificity	Detected in all			Low cancer specificity	Detected in all			Liver - Hepatocytes	Low region specificity	Detected in all
HIPK1	KIAA0630, MGC26642, MGC33446, MGC33548, Myak, Nbak2	ENSG00000163349	Homeodomain interacting protein kinase 1	Q86Z02	1	113929324-113977869	Enzymes, Plasma proteins, Predicted intracellular proteins, Predicted membrane proteins	Transcription, Transcription regulation	Kinase, Serine/threonine-protein kinase, Transferase		Evidence at protein level	Evidence at protein level	Evidence at protein level	Evidence at protein level	Tissue enhanced	Detected in all		bone marrow: 140.4	Low cell type specificity	Detected in all			Low cell type specificity	Detected in all			Low cancer specificity	Detected in all			Low region specificity	Detected in all			Low immune cell specificity	Detected in many			Low lineage specificity	Detected in all			Low cancer specificity	Detected in all			Adrenal gland - Adrenal cortex cells, Testis - Early spermatids, Thyroid gland - Thyroid glandular cells	Low region specificity	Detected in all
HRAS	HRAS1	ENSG00000174775	HRas proto-oncogene, GTPase	P01112	11	532242-537321	Cancer-related genes, Disease related genes, Enzymes, Human disease related genes, Plasma proteins, Potential drug targets, Predicted intracellular proteins, RAS pathway related proteins		Hydrolase	Cancer-related genes, Disease variant, Proto-oncogene	Evidence at protein level	Evidence at protein level	Evidence at protein level	Evidence at protein level	Low tissue specificity	Detected in all			Cell type enhanced	Detected in many		Suprabasal keratinocytes: 201.1	Low cell type specificity	Detected in all			Low cancer specificity	Detected in all			Low region specificity	Detected in all			Immune cell enhanced	Detected in some		non-classical monocyte: 4.0	Low lineage specificity	Detected in many			Low cancer specificity	Detected in all				Low region specificity	Detected in all
HSD3B1	HSD3B, HSDB3, SDR11E1	ENSG00000203857	Hydroxy-delta-5-steroid dehydrogenase, 3 beta- and steroid delta-isomerase 1	P14060	1	119507198-119515054	Enzymes, FDA approved drug targets, Metabolic proteins, Predicted intracellular proteins, Predicted membrane proteins	Lipid metabolism, Steroid metabolism, Steroidogenesis	Isomerase, Multifunctional enzyme, Oxidoreductase	FDA approved drug targets	Evidence at protein level	Evidence at protein level	Evidence at protein level	Evidence at protein level	Tissue enriched	Detected in some	9	placenta: 75.2	Cell type enriched	Detected in some	4	Syncytiotrophoblasts: 697.5	Not detected	Not detected			Cancer enhanced	Detected in some		Bladder Urothelial Carcinoma (TCGA): 3.2	Low region specificity	Detected in many			Not detected in immune cells	Not detected			Not detected	Not detected			Cancer enhanced	Detected in some		Bladder cancer: 15.5;Gastric cancer: 12.8;testis cancer: 24.4	Skin - Sebaceous gland cells
HSD3B2	SDR11E2	ENSG00000203859	Hydroxy-delta-5-steroid dehydrogenase, 3 beta- and steroid delta-isomerase 2	P26439	1	119414931-119423035	Disease related genes, Enzymes, FDA approved drug targets, Human disease related genes, Metabolic proteins, Predicted intracellular proteins, Predicted membrane proteins	Lipid metabolism, Steroidogenesis	Isomerase, Multifunctional enzyme, Oxidoreductase	Congenital adrenal hyperplasia, Disease variant, FDA approved drug targets	Evidence at protein level	Evidence at protein level	Evidence at protein level	Evidence at protein level	Tissue enriched	Detected in some	56	adrenal gland: 2106.0	Cell type enriched	Detected in some	16	Proximal enterocytes: 51.7	Not detected	Not detected			Not detected	Not detected			Low region specificity	Detected in many			Not detected in immune cells	Not detected			Not detected	Not detected			Cancer enriched	Detected in single	18	skin cancer: 9.2	Adrenal gland - Adrenal cortex cells
HTR7	5-HT7	ENSG00000148680	5-hydroxytryptamine receptor 7	P34969	10	90740823-90858039	FDA approved drug targets, G-protein coupled receptors, Predicted membrane proteins, RAS pathway related proteins		G-protein coupled receptor, Receptor, Transducer	FDA approved drug targets	Evidence at protein level	Evidence at protein level	Evidence at protein level	Evidence at protein level	Group enriched	Detected in some	5	parathyroid gland: 12.7;testis: 8.5	Cell type enhanced	Detected in some		Early spermatids: 9.2;Excitatory neurons: 5.7;Inhibitory neurons: 23.4;Macrophages: 3.6;Spermatocytes: 10.9	Cell type enhanced	Detected in many		LAMP5-LHX6 and Chandelier: 134.7;mammillary body: 335.5	Group enriched	Detected in some	5	Bladder Urothelial Carcinoma (TCGA): 2.5;Cervical Squamous Cell Carcinoma and Endocervical Adenocarcinoma (TCGA): 1.9;Head and Neck Squamous Cell Carcinoma (TCGA): 4.2;Lung Squamous Cell Carcinoma (TCGA): 2.1;Testicular Germ Cell Tumor (TCGA): 1.1	Low region specificity	Detected in all			Immune cell enriched	Detected in single	12	myeloid DC: 1.4	Lineage enriched	Detected in single	12	dendritic cells: 1.4	Low cancer specificity	Detected in many			Testis - Early spermatids	Low region specificity	Detected in many
HYDIN	CILD5, DKFZp434D0513, KIAA1864, PPP1R31	ENSG00000157423	HYDIN axonemal central pair apparatus protein	Q4G0P3	16	70802084-71230722	Disease related genes, Human disease related genes, Predicted intracellular proteins			Ciliopathy, Kartagener syndrome, Primary ciliary dyskinesia	Evidence at protein level	Evidence at protein level	Evidence at protein level	Evidence at protein level	Tissue enhanced	Detected in many		retina: 6.6	Cell type enhanced	Detected in many		Astrocytes: 33.4;Ciliated cells: 140.2;Early spermatids: 27.8;Excitatory neurons: 47.6;Inhibitory neurons: 24.8;Oligodendrocyte precursor cells: 24.5	Group enriched	Detected in all	5	choroid plexus epithelial cell: 500.8;ependymal cell: 1758.1	Low cancer specificity	Detected in some			Low region specificity	Detected in all			Not detected in immune cells	Not detected			Not detected	Not detected			Low cancer specificity	Detected in some			Lung - Respiratory ciliated cells, Testis - Early spermatids, Testis - Late spermatids	Low region specificity	Detected in single
IDO1	IDO, INDO	ENSG00000131203	Indoleamine 2,3-dioxygenase 1	P14902	8	39902275-39928790	Cancer-related genes, Enzymes, Metabolic proteins, Predicted intracellular proteins	Immunity, Tryptophan catabolism	Dioxygenase, Oxidoreductase	Cancer-related genes	Evidence at protein level	Evidence at protein level	Evidence at protein level	Evidence at protein level	Tissue enhanced	Detected in many		lymphoid tissue: 57.3;placenta: 107.2	Group enriched	Detected in many	5	Glandular and luminal cells: 295.2;Schwann cells: 323.4	Cell type enhanced	Detected in some		leukocyte: 3.0;lower rhombic lip: 1.2	Low cancer specificity	Detected in all			Low region specificity	Detected in all			Immune cell enriched	Detected in many	14	eosinophil: 465.9	Lineage enriched	Detected in many	18	granulocytes: 465.9	Cancer enhanced	Detected in many		thyroid cancer: 15.4	Adipose subcutaneous - T-cells, Pituitary gland - T-cells, Skeletal muscle - Skeletal myocytes, Spleen - T-cells	Region enriched	Detected in many
IFT122	FAP80, SPG, WDR10, WDR10p, WDR140	ENSG00000163913	Intraflagellar transport 122	Q9HBG6	3	129429607-129520510	Disease related genes, Human disease related genes, Potential drug targets, Predicted intracellular proteins, Transporters	Cilium biogenesis/degradation	Developmental protein	Ciliopathy, Disease variant, Ectodermal dysplasia	Evidence at protein level	Evidence at protein level	Evidence at protein level	Evidence at protein level	Tissue enhanced	Detected in all		testis: 45.8	Cell type enhanced	Detected in all		Early spermatids: 80.8;Late spermatids: 67.8;Spermatocytes: 110.8	Low cell type specificity	Detected in all			Low cancer specificity	Detected in all			Low region specificity	Detected in all			Low immune cell specificity	Detected in many			Low lineage specificity	Detected in many			Low cancer specificity	Detected in many			Testis - Early spermatids	Low region specificity	Detected in all
IFT140	gs114, KIAA0590, WDTC2	ENSG00000187535	Intraflagellar transport 140	Q96RY7	16	1510427-1612072	Disease related genes, Human disease related genes, Predicted intracellular proteins	Cilium biogenesis/degradation		Ciliopathy, Disease variant, Retinitis pigmentosa	Evidence at protein level	Evidence at protein level	Evidence at protein level	Evidence at protein level	Low tissue specificity	Detected in all			Cell type enhanced	Detected in many		Ciliated cells: 35.9;Late spermatids: 26.0	Low cell type specificity	Detected in all			Low cancer specificity	Detected in all			Low region specificity	Detected in all			Immune cell enhanced	Detected in some		MAIT T-cell: 3.7	Low lineage specificity	Detected in many			Low cancer specificity	Detected in all			Testis - Early spermatids	Low region specificity	Detected in all
IFT20		ENSG00000109083	Intraflagellar transport 20	Q8IY31	17	28328325-28335489	Predicted intracellular proteins	Cilium biogenesis/degradation, Differentiation, Spermatogenesis			Evidence at protein level	Evidence at transcript level	Evidence at protein level	Evidence at protein level	Low tissue specificity	Detected in all			Low cell type specificity	Detected in all			Low cell type specificity	Detected in all			Low cancer specificity	Detected in all			Low region specificity	Detected in all			Low immune cell specificity	Detected in all			Low lineage specificity	Detected in all			Low cancer specificity	Detected in all			Testis - Early spermatids	Low region specificity	Detected in all
IFT22	DKFZp761N0823, FAP9, FLJ13225, FLJ14117, RABL5	ENSG00000128581	Intraflagellar transport 22	Q9H7X7	7	101310914-101321823	Predicted intracellular proteins				Evidence at protein level	Evidence at transcript level	Evidence at protein level	Evidence at protein level	Low tissue specificity	Detected in all			Cell type enhanced	Detected in many		Early spermatids: 563.3;Late spermatids: 1471.4;Spermatocytes: 323.1	Low cell type specificity	Detected in all			Low cancer specificity	Detected in all			Low region specificity	Detected in all			Low immune cell specificity	Detected in many			Low lineage specificity	Detected in all			Low cancer specificity	Detected in all			Lung - Respiratory ciliated cells, Testis - Early spermatids, Thyroid gland - Thyroid glandular cells	Low region specificity	Detected in all
IFT43	C14orf179, FLJ32173, MGC16028	ENSG00000119650	Intraflagellar transport 43	Q96FT9	14	75902136-76084585	Disease related genes, Human disease related genes, Predicted intracellular proteins	Cilium biogenesis/degradation		Ciliopathy, Disease variant, Ectodermal dysplasia, Retinitis pigmentosa	Evidence at protein level	Evidence at protein level	Evidence at protein level	Evidence at protein level	Low tissue specificity	Detected in all			Cell type enhanced	Detected in all		Ciliated cells: 227.2;Early spermatids: 211.0	Low cell type specificity	Detected in all			Low cancer specificity	Detected in all			Low region specificity	Detected in all			Low immune cell specificity	Detected in all			Low lineage specificity	Detected in all			Low cancer specificity	Detected in all			Testis - Early spermatids, Testis - Late spermatids	Low region specificity	Detected in all
IFT46	C11orf2, C11orf60, CFAP32, FLJ21827	ENSG00000118096	Intraflagellar transport 46	Q9NQC8	11	118544528-118572970	Predicted intracellular proteins, Transporters				Evidence at protein level	Evidence at transcript level	Evidence at protein level	Evidence at protein level	Low tissue specificity	Detected in all			Cell type enhanced	Detected in many		Ciliated cells: 64.8;Spermatocytes: 45.9	Cell type enriched	Detected in all	4	ependymal cell: 113.3	Low cancer specificity	Detected in all			Low region specificity	Detected in all			Low immune cell specificity	Detected in all			Low lineage specificity	Detected in all			Low cancer specificity	Detected in all			Liver - Hepatocytes, Lung - Respiratory ciliated cells, Testis - Spermatocytes	Low region specificity	Detected in all
IFT52	C20orf9, CGI-53, dJ1028D15.1, NGD2, NGD5	ENSG00000101052	Intraflagellar transport 52	Q9Y366	20	43590937-43647299	Disease related genes, Human disease related genes, Predicted intracellular proteins	Cilium biogenesis/degradation		Ciliopathy, Disease variant	Evidence at protein level	Evidence at protein level	Evidence at protein level	Evidence at protein level	Low tissue specificity	Detected in all			Cell type enhanced	Detected in all		Early spermatids: 94.2	Low cell type specificity	Detected in all			Low cancer specificity	Detected in all			Low region specificity	Detected in all			Low immune cell specificity	Detected in all			Low lineage specificity	Detected in all			Low cancer specificity	Detected in all			Prostate - Fibroblasts, Skin - Fibroblast_1, Thyroid gland - Thyroid glandular cells	Low region specificity	Detected in all
IFT57	ESRRBL1, FLJ10147, HIPPI, MHS4R2	ENSG00000114446	Intraflagellar transport 57	Q9NWB7	3	108160812-108222435	Disease related genes, Human disease related genes, Predicted intracellular proteins	Apoptosis, Transcription, Transcription regulation	DNA-binding	Ciliopathy	Evidence at protein level	Evidence at protein level	Evidence at protein level	Evidence at protein level	Low tissue specificity	Detected in all			Group enriched	Detected in all	5	Early spermatids: 1560.8;Late spermatids: 2899.1	Cell type enhanced	Detected in all		ependymal cell: 155.4	Low cancer specificity	Detected in all			Low region specificity	Detected in all			Immune cell enhanced	Detected in many		memory B-cell: 42.0	Low lineage specificity	Detected in all			Low cancer specificity	Detected in all			Testis - Early spermatids, Testis - Late spermatids, Thyroid gland - Thyroid glandular cells	Low region specificity	Detected in all
IFT74	CCDC2, CMG-1, CMG1, FLJ22621	ENSG00000096872	Intraflagellar transport 74	Q96LB3	9	26947039-27066134	Disease related genes, Human disease related genes, Potential drug targets, Predicted intracellular proteins, Transporters	Cilium biogenesis/degradation	Developmental protein	Bardet-Biedl syndrome, Ciliopathy, Disease variant, Joubert syndrome, Obesity	Evidence at protein level	Evidence at protein level	Evidence at protein level	Evidence at protein level	Low tissue specificity	Detected in all			Cell type enhanced	Detected in all		Early spermatids: 120.4;Spermatocytes: 190.7	Low cell type specificity	Detected in all			Low cancer specificity	Detected in all			Low region specificity	Detected in all			Low immune cell specificity	Detected in many			Low lineage specificity	Detected in all			Low cancer specificity	Detected in all			Testis - Early spermatids	Low region specificity	Detected in all
IFT81	CDV-1R, CDV1, MGC4027	ENSG00000122970	Intraflagellar transport 81	Q8WYA0	12	110124335-110218793	Disease related genes, Human disease related genes, Potential drug targets, Predicted intracellular proteins, Transporters	Cilium biogenesis/degradation, Differentiation, Spermatogenesis		Ciliopathy, Disease variant	Evidence at protein level	Evidence at protein level	Evidence at protein level	Evidence at protein level	Low tissue specificity	Detected in all			Cell type enhanced	Detected in many		Ciliated cells: 87.2;Early spermatids: 66.1;Spermatocytes: 178.2	Cell type enhanced	Detected in all		ependymal cell: 215.7	Low cancer specificity	Detected in all			Low region specificity	Detected in all			Low immune cell specificity	Detected in some			Low lineage specificity	Detected in single			Low cancer specificity	Detected in all			Adipose visceral - Adipose progenitor cells, Lung - Respiratory ciliated cells, Testis - Early spermatids, Testis - Spermatocytes	Low region specificity	Detected in all
IFT88	D13S1056E, hTg737, MGC26259, Tg737, TTC10	ENSG00000032742	Intraflagellar transport 88	Q13099	13	20567138-20691444	Predicted intracellular proteins, Transporters	Cilium biogenesis/degradation			Evidence at protein level	Evidence at protein level	Evidence at protein level	Evidence at protein level	Tissue enhanced	Detected in all		testis: 68.1	Cell type enhanced	Detected in all		Early spermatids: 116.8;Rod photoreceptor cells: 146.0;Spermatocytes: 237.8	Cell type enhanced	Detected in all		ependymal cell: 558.1	Low cancer specificity	Detected in all			Low region specificity	Detected in all			Low immune cell specificity	Detected in all			Low lineage specificity	Detected in all			Low cancer specificity	Detected in many			Spleen - Endothelial cells, Testis - Early spermatids	Low region specificity	Detected in all
IGBP1	alpha4, IBP1	ENSG00000089289	Immunoglobulin binding protein 1	P78318	X	70133447-70166324	Disease related genes, Human disease related genes, Predicted intracellular proteins	B-cell activation	Chaperone	Intellectual disability	Evidence at protein level	Evidence at protein level	Evidence at protein level	Evidence at protein level	Low tissue specificity	Detected in all			Cell type enhanced	Detected in all		Proximal enterocytes: 331.5	Low cell type specificity	Detected in all			Low cancer specificity	Detected in all			Low region specificity	Detected in all			Low immune cell specificity	Detected in all			Low lineage specificity	Detected in all			Low cancer specificity	Detected in all				Low region specificity	Detected in all
IGBP1P2		ENSG00000266826	Immunoglobulin (CD79A) binding protein 1 pseudogene 2		17	58660424-58692045	Predicted intracellular proteins				Evidence at protein level	Evidence at protein level	No human protein/transcript evidence		Tissue enriched	Detected in single	32	testis: 8.5	Group enriched	Detected in some	6	Early spermatids: 27.0;Late spermatids: 41.0;Spermatocytes: 15.4	Not detected	Not detected			Not detected	Not detected			Not detected	Not detected			Not detected in immune cells	Not detected			Not detected	Not detected			Not detected	Not detected			Testis - Early spermatids
IGF1R	CD221, IGFIR, IGFR, JTK13, MGC18216	ENSG00000140443	Insulin like growth factor 1 receptor	P08069	15	98648539-98964530	Cancer-related genes, CD markers, Disease related genes, Enzymes, FDA approved drug targets, Human disease related genes, Plasma proteins, Predicted intracellular proteins, Predicted membrane proteins, RAS pathway related proteins	Host-virus interaction	Kinase, Receptor, Transferase, Tyrosine-protein kinase	Cancer-related genes, Disease variant, FDA approved drug targets	Evidence at protein level	Evidence at protein level	Evidence at protein level	Evidence at protein level	Low tissue specificity	Detected in many			Cell type enhanced	Detected in many		Excitatory neurons: 231.4;Inhibitory neurons: 186.7;Microglial cells: 234.4;Oligodendrocyte precursor cells: 223.1;Oligodendrocytes: 242.8	Cell type enhanced	Detected in all		endothelial cell: 1591.5	Low cancer specificity	Detected in many			Low region specificity	Detected in all			Immune cell enhanced	Detected in some		neutrophil: 4.3	Group enriched	Detected in many	6	granulocytes: 4.3;T-cells: 1.4	Low cancer specificity	Detected in all			Liver - Vascular Endothelial cells, Minor Salivary Gland - Minor salivary glandular cells	Low region specificity	Detected in all
IL10RA	CD210, CD210a, CDW210A, HIL-10R, IL10R	ENSG00000110324	Interleukin 10 receptor subunit alpha	Q13651	11	117986370-118003037	CD markers, Disease related genes, Human disease related genes, Potential drug targets, Predicted membrane proteins, Transporters		Receptor	Disease variant	Evidence at protein level	Evidence at protein level	Evidence at protein level	Evidence at protein level	Tissue enhanced	Detected in many		bone marrow: 57.1;lymphoid tissue: 71.9	Cell type enhanced	Detected in many		dendritic cells: 86.1;Extravillous trophoblasts: 105.7;Hofbauer cells: 91.4;Kupffer cells: 163.9;Langerhans cells: 181.9;Macrophages: 131.9;monocytes: 262.6;NK-cells: 104.4;Plasma cells: 93.4;T-cells: 111.3	Group enriched	Detected in many	32	central nervous system macrophage: 125.7;leukocyte: 186.8	Low cancer specificity	Detected in all			Low region specificity	Detected in many			Low immune cell specificity	Detected in all			Low lineage specificity	Detected in all			Cancer enhanced	Detected in some		lymphoma: 28.7;Myeloma: 13.1	Adipose subcutaneous - Macrophages, Adrenal gland - Macrophages, Breast - Macrophages, Skeletal muscle - Macrophages, Skin - T-cells, Stomach - Macrophages, Testis - Macrophages	Low region specificity	Detected in all
INPP5B		ENSG00000204084	Inositol polyphosphate-5-phosphatase B	P32019	1	37860697-37947057	Enzymes, Metabolic proteins, Predicted intracellular proteins	Lipid metabolism	Hydrolase		Evidence at protein level	Evidence at protein level	Evidence at protein level	Evidence at protein level	Low tissue specificity	Detected in all			Cell type enhanced	Detected in many		Excitatory neurons: 45.9;Inhibitory neurons: 46.6;Oligodendrocytes: 36.7	Low cell type specificity	Detected in all			Low cancer specificity	Detected in all			Low region specificity	Detected in all			Low immune cell specificity	Detected in all			Low lineage specificity	Detected in all			Low cancer specificity	Detected in all				Low region specificity	Detected in all
INSR	CD220	ENSG00000171105	Insulin receptor	P06213	19	7112255-7294414	CD markers, Disease related genes, Enzymes, FDA approved drug targets, Human disease related genes, Plasma proteins, Predicted intracellular proteins, Predicted membrane proteins, RAS pathway related proteins	Carbohydrate metabolism	Kinase, Receptor, Transferase, Tyrosine-protein kinase	Diabetes mellitus, Disease variant, FDA approved drug targets	Evidence at protein level	Evidence at transcript level	Evidence at protein level	Evidence at protein level	Low tissue specificity	Detected in all			Cell type enhanced	Detected in all		monocytes: 261.0	Low cell type specificity	Detected in all			Low cancer specificity	Detected in all			Low region specificity	Detected in all			Low immune cell specificity	Detected in many			Group enriched	Detected in many	8	dendritic cells: 9.8;granulocytes: 5.9;monocytes: 12.6	Cancer enhanced	Detected in all		Myeloma: 24.6	Pituitary gland - Corticotropes	Low region specificity	Detected in all
INTU	CPLANE4, KIAA1284, PDZD6, PDZK6	ENSG00000164066	Inturned planar cell polarity protein	Q9ULD6	4	127623271-127726737	Disease related genes, Human disease related genes, Predicted intracellular proteins	Cilium biogenesis/degradation	Developmental protein	Ciliopathy, Disease variant	Evidence at protein level	Evidence at transcript level	Evidence at protein level	Evidence at protein level	Tissue enhanced	Detected in many		retina: 12.7	Cell type enhanced	Detected in many		Astrocytes: 126.6;Cone photoreceptor cells: 90.1;Oligodendrocytes: 72.6;Rod photoreceptor cells: 187.9	Low cell type specificity	Detected in all			Low cancer specificity	Detected in many			Low region specificity	Detected in all			Immune cell enhanced	Detected in some		neutrophil: 1.3	Low lineage specificity	Detected in single			Low cancer specificity	Detected in all			Lung - Respiratory ciliated cells	Low region specificity	Detected in all
INVS	NPHP2	ENSG00000119509	Inversin	Q9Y283	9	100099243-100302175	Disease related genes, Human disease related genes, Predicted intracellular proteins	Wnt signaling pathway	Calmodulin-binding, Developmental protein	Ciliopathy, Disease variant, Nephronophthisis	Evidence at protein level	Evidence at transcript level	Evidence at protein level	Evidence at protein level	Low tissue specificity	Detected in all			Cell type enhanced	Detected in many		Astrocytes: 126.0;Excitatory neurons: 139.9;Inhibitory neurons: 136.9;Microglial cells: 107.4;Oligodendrocyte precursor cells: 135.4;Oligodendrocytes: 217.6	Low cell type specificity	Detected in all			Low cancer specificity	Detected in all			Low region specificity	Detected in all			Low immune cell specificity	Detected in many			Low lineage specificity	Detected in all			Low cancer specificity	Detected in all				Low region specificity	Detected in all
IPMK		ENSG00000151151	Inositol polyphosphate multikinase	Q8NFU5	10	58191517-58267894	Enzymes, Metabolic proteins, Predicted intracellular proteins	Lipid metabolism, Phospholipid metabolism	Kinase, Transferase		Evidence at protein level	Evidence at protein level	Evidence at protein level	Evidence at protein level	Tissue enhanced	Detected in many		liver: 17.5	Cell type enhanced	Detected in many		monocytes: 94.1	Low cell type specificity	Detected in all			Low cancer specificity	Detected in all			Low region specificity	Detected in all			Immune cell enhanced	Detected in some		neutrophil: 3.0	Group enriched	Detected in many	4	granulocytes: 3.0;monocytes: 1.0	Cancer enhanced	Detected in all		Gallbladder cancer: 26.4	Testis - Spermatocytes	Low region specificity	Detected in all
IQCB1	KIAA0036, NPHP5, SLSN5	ENSG00000173226	IQ motif containing B1	Q15051	3	121769761-121835079	Disease related genes, Human disease related genes, Predicted intracellular proteins	Cilium biogenesis/degradation	Calmodulin-binding	Ciliopathy, Leber congenital amaurosis, Nephronophthisis, Senior-Loken syndrome	Evidence at protein level	Evidence at protein level	Evidence at protein level	Evidence at protein level	Low tissue specificity	Detected in all			Cell type enhanced	Detected in all		Oocytes: 104.4;Spermatocytes: 168.8	Low cell type specificity	Detected in all			Low cancer specificity	Detected in all			Low region specificity	Detected in all			Low immune cell specificity	Detected in all			Low lineage specificity	Detected in all			Low cancer specificity	Detected in all			Testis - Spermatocytes	Low region specificity	Detected in all
IQCE	KIAA1023	ENSG00000106012	IQ motif containing E	Q6IPM2	7	2558972-2614733	Disease related genes, Human disease related genes, Predicted intracellular proteins				Evidence at protein level	Evidence at transcript level	Evidence at protein level	Evidence at protein level	Low tissue specificity	Detected in all			Group enriched	Detected in all	7	Early spermatids: 340.5;Late spermatids: 469.0	Low cell type specificity	Detected in all			Low cancer specificity	Detected in all			Low region specificity	Detected in all			Immune cell enhanced	Detected in some		neutrophil: 3.8	Group enriched	Detected in many	4	dendritic cells: 2.4;granulocytes: 3.8;monocytes: 1.2	Low cancer specificity	Detected in all			Testis - Early spermatids, Testis - Late spermatids
JAZF1	DKFZp761K2222, TIP27, ZNF802	ENSG00000153814	JAZF zinc finger 1	Q86VZ6	7	27830573-28180795	Disease related genes, Human disease related genes, Predicted intracellular proteins	Lipid metabolism, Transcription, Transcription regulation		Proto-oncogene	Evidence at protein level	Evidence at protein level	Evidence at protein level	Evidence at protein level	Tissue enhanced	Detected in all		adrenal gland: 81.3	Cell type enhanced	Detected in many		Endometrial stromal cells: 161.2;Excitatory neurons: 305.8;Inhibitory neurons: 293.9;Microglial cells: 161.0;Oligodendrocyte precursor cells: 226.4;Oligodendrocytes: 244.3;Oocytes: 475.0	Low cell type specificity	Detected in all			Low cancer specificity	Detected in all			Low region specificity	Detected in all			Immune cell enhanced	Detected in many		basophil: 25.8	Group enriched	Detected in all	4	dendritic cells: 14.2;granulocytes: 25.8	Low cancer specificity	Detected in all			Thyroid gland - Fibroblasts	Low region specificity	Detected in all
KATNIP	JBTS26, KIAA0556	ENSG00000047578	Katanin interacting protein	O60303	16	27550133-27780344	Disease related genes, Human disease related genes, Predicted intracellular proteins			Ciliopathy, Joubert syndrome	Evidence at protein level	Evidence at protein level	Evidence at protein level	Evidence at protein level	Low tissue specificity	Detected in all			Cell type enhanced	Detected in many		Bipolar cells: 35.3;Ciliated cells: 39.2;Cone photoreceptor cells: 61.2;Oligodendrocytes: 50.0;Rod photoreceptor cells: 52.8	Low cell type specificity	Detected in all			Low cancer specificity	Detected in all			Low region specificity	Detected in all			Group enriched	Detected in many	5	basophil: 14.3;eosinophil: 3.6;neutrophil: 10.0;NK-cell: 5.0	Group enriched	Detected in all	5	granulocytes: 14.3;NK-cells: 5.0	Low cancer specificity	Detected in all			Lung - Respiratory ciliated cells, Testis - Early spermatids	Low region specificity	Detected in all
KCNF1	IK8, KCNF, kH1, Kv5.1	ENSG00000162975	Potassium voltage-gated channel modifier subfamily F member 1	Q9H3M0	2	10911934-10914225	Plasma proteins, Predicted membrane proteins, Transporters, Voltage-gated ion channels	Ion transport, Potassium transport, Transport	Ion channel, Potassium channel, Voltage-gated channel		Evidence at protein level	Evidence at protein level	Evidence at protein level	Evidence at protein level	Group enriched	Detected in some	29	brain: 46.8;choroid plexus: 24.1	Cell type enhanced	Detected in some		Excitatory neurons: 9.0;Extravillous trophoblasts: 17.6;Inhibitory neurons: 8.4;Oligodendrocyte precursor cells: 17.0;Syncytiotrophoblasts: 7.5	Low cell type specificity	Detected in many			Cancer enriched	Detected in many	7	Glioblastoma Multiforme (TCGA): 38.1	Low region specificity	Detected in all			Not detected in immune cells	Not detected			Not detected	Not detected			Cancer enhanced	Detected in some		breast cancer: 11.5;lung cancer: 9.0	Breast - Breast glandular cells (progenitors), Pancreas - Beta cells, Testis - Early spermatids, Testis - Late spermatids	Low region specificity	Detected in many
KCNRG		ENSG00000198553	Potassium channel regulator	Q8N5I3	13	50015254-50020922	Predicted intracellular proteins				Evidence at protein level	Evidence at transcript level	Evidence at protein level	Evidence at protein level	Tissue enriched	Detected in some	11	fallopian tube: 34.6	Cell type enhanced	Detected in some		Ciliated cells: 58.1;Early spermatids: 21.6;Ionocytes: 9.2;Late spermatids: 11.4;Spermatocytes: 9.1	Cell type enriched	Detected in single	6	ependymal cell: 6.2	Cancer enhanced	Detected in some		Uterine Corpus Endometrial Carcinoma (TCGA): 3.4	Low region specificity	Detected in all			Low immune cell specificity	Detected in single			Low lineage specificity	Detected in single			Low cancer specificity	Detected in some			Lung - Respiratory ciliated cells, Testis - Early spermatids	Not detected	Not detected
KIAA0753	MNR, OFIP	ENSG00000198920	KIAA0753	Q2KHM9	17	6578147-6640711	Disease related genes, Human disease related genes, Predicted intracellular proteins			Ciliopathy, Disease variant, Joubert syndrome	Evidence at protein level	Evidence at protein level	Evidence at protein level	Evidence at protein level	Low tissue specificity	Detected in all			Cell type enhanced	Detected in many		Early spermatids: 98.5;Excitatory neurons: 45.1	Low cell type specificity	Detected in all			Low cancer specificity	Detected in all			Low region specificity	Detected in all			Low immune cell specificity	Detected in single			Low lineage specificity	Detected in single			Low cancer specificity	Detected in all			Liver - Vascular Endothelial cells, Spleen - Endothelial cells, Testis - Early spermatids	Low region specificity	Detected in some
KIAA1671		ENSG00000197077	KIAA1671	Q9BY89	22	24952716-25197448	Predicted intracellular proteins				Evidence at protein level	Evidence at protein level	Evidence at protein level	Evidence at protein level	Low tissue specificity	Detected in many			Cell type enhanced	Detected in many		Astrocytes: 70.6;Excitatory neurons: 65.4	Low cell type specificity	Detected in all			Low cancer specificity	Detected in all			Low region specificity	Detected in all			Immune cell enhanced	Detected in some		gdT-cell: 1.8	Lineage enriched	Detected in single	4	T-cells: 1.8	Low cancer specificity	Detected in all			Adrenal gland - Adrenal cortex cells, Liver - Hepatocytes, Prostate - Prostate basal glandular cells, Thyroid gland - Thyroid glandular cells	Low region specificity	Detected in all
KIF11	Eg5, HKSP, KNSL1, TRIP5	ENSG00000138160	Kinesin family member 11	P52732	10	92574105-92655395	Disease related genes, Human disease related genes, Plasma proteins, Predicted intracellular proteins	Cell cycle, Cell division, Mitosis	Motor protein	Disease variant	Evidence at protein level	Evidence at protein level	Evidence at protein level	Evidence at protein level	Tissue enhanced	Detected in many		bone marrow: 19.1;lymphoid tissue: 36.9	Cell type enhanced	Detected in many		Early spermatids: 20.2;Erythroid cells: 47.4;Oocytes: 21.3;Plasma cells: 22.1;Spermatocytes: 39.8;Spermatogonia: 21.3	Low cell type specificity	Detected in many			Low cancer specificity	Detected in many			Low region specificity	Detected in all			Low immune cell specificity	Detected in some			Low lineage specificity	Detected in many			Low cancer specificity	Detected in all			Adrenal gland - Mitotic cells (Adrenal gland), Colon - Mitotic cells (Colon), Lung - Mitotic cells (Lung), Minor Salivary Gland - Mitotic cells (Minor salivary gland), Skin - Mitotic cells (Skin), Spleen - Mitotic cells (Spleen), Stomach - Mitotic cells (Stomach), Testis - Spermatocytes	Low region specificity	Detected in many
KIF17	KIAA1405, KIF17B, KIF3X, KLP-2, OSM-3	ENSG00000117245	Kinesin family member 17	Q9P2E2	1	20664014-20718017	Plasma proteins, Predicted intracellular proteins	Protein transport, Transport	Motor protein		Evidence at protein level	Evidence at protein level	Evidence at transcript level	Evidence at protein level	Tissue enriched	Detected in some	5	testis: 22.6	Cell type enhanced	Detected in some		Adipocytes: 17.0;Early spermatids: 39.0;Endothelial cells: 13.6;Late spermatids: 80.9;Lymphatic endothelial cells: 14.0	Cell type enhanced	Detected in many		ependymal cell: 40.8	Cancer enriched	Detected in single	4	Testicular Germ Cell Tumor (TCGA): 2.6	Low region specificity	Detected in many			Not detected in immune cells	Not detected			Not detected	Not detected			Low cancer specificity	Detected in some			Adipose subcutaneous - Endothelial cells, Adipose visceral - Endothelial cells, Breast - Endothelial cells, Minor Salivary Gland - Endothelial cells, Testis - Late spermatids	Low region specificity	Detected in all
KIF20B	CT90, KRMP1, MPHOSPH1, MPP1	ENSG00000138182	Kinesin family member 20B	Q96Q89	10	89701590-89774939	Predicted intracellular proteins	Cell cycle, Cell division, Mitosis	Motor protein	Oncogene	Evidence at protein level	Evidence at protein level	Evidence at protein level	Evidence at protein level	Tissue enhanced	Detected in many		bone marrow: 10.1;lymphoid tissue: 9.6	Cell type enhanced	Detected in many		Erythroid cells: 97.2;Oocytes: 94.1;Spermatocytes: 171.7;Spermatogonia: 92.2	Cell type enhanced	Detected in all		central nervous system macrophage: 73.3	Low cancer specificity	Detected in many			Low region specificity	Detected in all			Low immune cell specificity	Detected in many			Low lineage specificity	Detected in all			Low cancer specificity	Detected in all			Lung - Mitotic cells (Lung), Skin - Mitotic cells (Skin), Spleen - Mitotic cells (Spleen), Stomach - Mitotic cells (Stomach), Testis - Spermatocytes	Low region specificity	Detected in single
KIF26B	FLJ10157	ENSG00000162849	Kinesin family member 26B	Q2KJY2	1	245154985-245709432	Predicted intracellular proteins		Developmental protein, Motor protein	Disease variant	Evidence at protein level	Evidence at protein level	Evidence at protein level	Evidence at protein level	Tissue enhanced	Detected in some		brain: 3.8	Group enriched	Detected in many	4	Inhibitory neurons: 270.5;Oligodendrocyte precursor cells: 354.7	Cell type enhanced	Detected in all		MGE interneuron: 774.3;oligodendrocyte precursor cell: 654.1	Low cancer specificity	Detected in many			Low region specificity	Detected in all			Immune cell enriched	Detected in single	18	plasmacytoid DC: 1.8	Lineage enriched	Detected in single	18	dendritic cells: 1.8	Cancer enriched	Detected in many	5	Neuroblastoma: 18.4	Adipose visceral - Adipose progenitor cells, Testis - Early spermatids, Thyroid gland - Thyroid glandular cells	Low region specificity	Detected in all
KIF2A	HK2, KIF2	ENSG00000068796	Kinesin family member 2A	O00139	5	62306162-62391025	Cancer-related genes, Disease related genes, Human disease related genes, Plasma proteins, Predicted intracellular proteins	Cell cycle, Cell division, Differentiation, Mitosis, Neurogenesis	Developmental protein, Motor protein	Cancer-related genes, Disease variant, Lissencephaly	Evidence at protein level	Evidence at protein level	Evidence at protein level	Evidence at protein level	Low tissue specificity	Detected in all			Cell type enhanced	Detected in all		Cone photoreceptor cells: 418.0	Low cell type specificity	Detected in all			Low cancer specificity	Detected in all			Low region specificity	Detected in all			Low immune cell specificity	Detected in all			Low lineage specificity	Detected in all			Low cancer specificity	Detected in all			Testis - Early spermatids	Low region specificity	Detected in all
KIF3A	FLA10, KLP-20	ENSG00000131437	Kinesin family member 3A	Q9Y496	5	132692628-132737638	Predicted intracellular proteins	Cilium biogenesis/degradation	Motor protein		Evidence at protein level	Evidence at protein level	Evidence at protein level	Evidence at protein level	Tissue enhanced	Detected in all		brain: 41.7;retina: 32.8	Cell type enhanced	Detected in all		Cone photoreceptor cells: 139.3;Excitatory neurons: 172.8;Inhibitory neurons: 150.4;Spermatocytes: 148.0	Low cell type specificity	Detected in all			Low cancer specificity	Detected in many			Low region specificity	Detected in all			Immune cell enriched	Detected in many	10	basophil: 68.3	Lineage enriched	Detected in all	10	granulocytes: 68.3	Low cancer specificity	Detected in all			Testis - Early spermatids, Testis - Spermatocytes	Low region specificity	Detected in all
KIF3B	FLA8, KIAA0359, KLP-11	ENSG00000101350	Kinesin family member 3B	O15066	20	32277651-32335011	Disease related genes, Human disease related genes, Plasma proteins, Predicted intracellular proteins		Motor protein	Ciliopathy, Disease variant, Retinitis pigmentosa	Evidence at protein level	Evidence at protein level	Evidence at protein level	Evidence at protein level	Low tissue specificity	Detected in all			Cell type enhanced	Detected in all		Late spermatids: 89.0	Low cell type specificity	Detected in all			Low cancer specificity	Detected in all			Low region specificity	Detected in all			Low immune cell specificity	Detected in many			Low lineage specificity	Detected in all			Low cancer specificity	Detected in all			Testis - Early spermatids, Thyroid gland - Thyroid glandular cells	Low region specificity	Detected in all
KIF6	C6orf102, dJ1043E3.1, dJ137F1.4, dJ188D3.1, DKFZp451I2418, MGC33317	ENSG00000164627	Kinesin family member 6	Q6ZMV9	6	39329990-39725408	Predicted intracellular proteins		Motor protein		Evidence at protein level	Evidence at protein level	Evidence at protein level	Evidence at protein level	Tissue enhanced	Detected in some		brain: 8.9;testis: 5.1	Cell type enriched	Detected in some	6	Oligodendrocytes: 205.0	Cell type enhanced	Detected in all		ependymal cell: 477.7;oligodendrocyte: 443.9	Group enriched	Detected in some	4	Glioblastoma Multiforme (TCGA): 2.8;Skin Cuteneous Melanoma (TCGA): 3.1;Uterine Corpus Endometrial Carcinoma (TCGA): 1.0	Low region specificity	Detected in all			Not detected in immune cells	Not detected			Not detected	Not detected			Cancer enriched	Detected in some	5	skin cancer: 9.6	Lung - Respiratory ciliated cells, Testis - Early spermatids	Low region specificity	Detected in many
KIF7	JBTS12	ENSG00000166813	Kinesin family member 7	Q2M1P5	15	89608789-89663086	Disease related genes, Human disease related genes, Predicted intracellular proteins		Motor protein, Repressor	Bardet-Biedl syndrome, Ciliopathy, Disease variant, Intellectual disability, Joubert syndrome, Obesity	Evidence at protein level	Evidence at protein level	Evidence at protein level	Evidence at protein level	Low tissue specificity	Detected in many			Cell type enhanced	Detected in many		Astrocytes: 13.6;Oligodendrocyte precursor cells: 9.4;Oocytes: 27.9	Cell type enhanced	Detected in many		astrocyte: 31.7	Low cancer specificity	Detected in many			Low region specificity	Detected in all			Not detected in immune cells	Not detected			Not detected	Not detected			Low cancer specificity	Detected in all			Kidney - Fibroblasts	Low region specificity	Detected in single
KIF9	MGC104186	ENSG00000088727	Kinesin family member 9	Q9HAQ2	3	47227998-47283451	Predicted intracellular proteins		Motor protein		Evidence at protein level	Evidence at transcript level	Evidence at protein level	Evidence at protein level	Tissue enhanced	Detected in all		choroid plexus: 110.4;testis: 66.5	Cell type enhanced	Detected in all		Ciliated cells: 303.8;Early spermatids: 894.2;Proximal tubular cells: 199.0;Spermatocytes: 269.7	Cell type enhanced	Detected in all		ependymal cell: 154.9	Low cancer specificity	Detected in all			Low region specificity	Detected in all			Low immune cell specificity	Detected in many			Low lineage specificity	Detected in all			Low cancer specificity	Detected in all			Lung - Respiratory ciliated cells, Testis - Early spermatids, Thyroid gland - Thyroid glandular cells	Low region specificity	Detected in all
KIFAP3	FLA3, KAP-1, KAP3, SMAP	ENSG00000075945	Kinesin associated protein 3	Q92845	1	169921326-170085208	Plasma proteins, Predicted intracellular proteins				Evidence at protein level	Evidence at protein level	Evidence at protein level	Evidence at protein level	Low tissue specificity	Detected in all			Cell type enhanced	Detected in all		Early spermatids: 205.2;Excitatory neurons: 184.0;Inhibitory neurons: 184.6;Late spermatids: 211.9	Low cell type specificity	Detected in all			Low cancer specificity	Detected in all			Low region specificity	Detected in all			Low immune cell specificity	Detected in all			Low lineage specificity	Detected in all			Low cancer specificity	Detected in all			Testis - Spermatocytes, Testis - Spermatogonia	Low region specificity	Detected in all
KIFC1	HSET, KNSL2	ENSG00000237649	Kinesin family member C1	Q9BW19	6	33391823-33409896	Plasma proteins, Predicted intracellular proteins	Cell cycle, Cell division, Mitosis	Motor protein		Evidence at protein level	Evidence at protein level	Evidence at protein level	Evidence at protein level	Tissue enhanced	Detected in many		bone marrow: 39.1;lymphoid tissue: 46.3	Cell type enhanced	Detected in many		Erythroid cells: 33.2;Extravillous trophoblasts: 37.6;Late spermatids: 19.1;Oocytes: 22.1;Undifferentiated cells: 21.1	Cell type enhanced	Detected in some		fibroblast: 2.8	Low cancer specificity	Detected in all			Low region specificity	Detected in many			Immune cell enhanced	Detected in some		T-reg: 1.6	Low lineage specificity	Detected in many			Low cancer specificity	Detected in all			Adrenal gland - Mitotic cells (Adrenal gland), Breast - Breast glandular cells, Colon - Mitotic cells (Colon), Heart muscle - Mitotic cells (Heart), Lung - Mitotic cells (Lung), Minor Salivary Gland - Mitotic cells (Minor salivary gland), Skin - Mitotic cells (Skin), Spleen - Mitotic cells (Spleen), Stomach - Mitotic cells (Stomach), Testis - Spermatocytes, Thyroid gland - Mitotic cells (Thyroid)	Low region specificity	Detected in some
KLHL4	DKELCHL, KHL4, KIAA1687	ENSG00000102271	Kelch like family member 4	Q9C0H6	X	87517409-87670050	Predicted intracellular proteins		Actin-binding		Evidence at protein level	Evidence at protein level	Evidence at protein level	Evidence at protein level	Tissue enhanced	Detected in many		adrenal gland: 25.6;brain: 11.4;ovary: 9.9	Group enriched	Detected in some	4	Lymphatic endothelial cells: 84.0;Oligodendrocytes: 266.4	Cell type enhanced	Detected in many		oligodendrocyte: 441.8	Cancer enriched	Detected in some	9	Glioblastoma Multiforme (TCGA): 13.8	Low region specificity	Detected in all			Not detected in immune cells	Not detected			Not detected	Not detected			Cancer enhanced	Detected in many		testis cancer: 16.4	Adrenal gland - Adrenal cortex cells, Lung - Fibroblast_2, Skeletal muscle - Fibroblasts, Testis - Sertoli cells, Thyroid gland - Fibroblasts	Low region specificity	Detected in all
KMT5B	CGI-85, SUV420H1	ENSG00000110066	Lysine methyltransferase 5B	Q4FZB7	11	68154863-68213852	Disease related genes, Enzymes, Human disease related genes, Metabolic proteins, Plasma proteins, Potential drug targets, Predicted intracellular proteins	Myogenesis, Transcription, Transcription regulation	Chromatin regulator, Methyltransferase, Repressor, Transferase	Disease variant, Intellectual disability	Evidence at protein level	Evidence at transcript level	Evidence at protein level	Evidence at protein level	Low tissue specificity	Detected in all			Low cell type specificity	Detected in all			Low cell type specificity	Detected in all			Low cancer specificity	Detected in all			Low region specificity	Detected in all			Low immune cell specificity	Detected in all			Low lineage specificity	Detected in all			Low cancer specificity	Detected in all				Low region specificity	Detected in all
LANCL1	GPR69A, p40	ENSG00000115365	LanC like glutathione S-transferase 1	O43813	2	210427131-210477652	Enzymes, Predicted intracellular proteins		Transferase		Evidence at protein level	Evidence at protein level	Evidence at protein level	Evidence at protein level	Tissue enhanced	Detected in all		brain: 166.8	Cell type enhanced	Detected in all		Early spermatids: 152.6;Inhibitory neurons: 151.0;Late spermatids: 123.1;Oligodendrocytes: 557.6	Cell type enhanced	Detected in all		oligodendrocyte: 992.6	Low cancer specificity	Detected in all			Low region specificity	Detected in all			Low immune cell specificity	Detected in many			Low lineage specificity	Detected in all			Low cancer specificity	Detected in all			Adrenal gland - Adrenal cortex cells, Testis - Early spermatids	Low region specificity	Detected in all
LCA5	C6orf152	ENSG00000135338	Lebercilin LCA5	Q86VQ0	6	79484991-79537458	Disease related genes, Human disease related genes, Predicted intracellular proteins	Protein transport, Transport		Disease variant, Leber congenital amaurosis	Evidence at protein level	Evidence at protein level	Evidence at protein level	Evidence at protein level	Low tissue specificity	Detected in all			Cell type enhanced	Detected in many		Ciliated cells: 71.5	Cell type enhanced	Detected in all		choroid plexus epithelial cell: 250.0;ependymal cell: 279.8	Cancer enhanced	Detected in many		Thyroid Carcinoma (TCGA): 7.7	Low region specificity	Detected in all			Not detected in immune cells	Not detected			Not detected	Not detected			Low cancer specificity	Detected in many			Lung - Respiratory ciliated cells, Testis - Spermatogonia	Low region specificity	Detected in all
LDLRAD1		ENSG00000203985	Low density lipoprotein receptor class A domain containing 1	Q5T700	1	54007298-54018186	Predicted intracellular proteins, Predicted membrane proteins		Receptor		Evidence at protein level	Evidence at protein level	Evidence at protein level	Evidence at protein level	Tissue enriched	Detected in some	17	fallopian tube: 112.4	Cell type enriched	Detected in some	5	Ciliated cells: 195.6	Not detected	Not detected			Cancer enhanced	Detected in many		Uterine Corpus Endometrial Carcinoma (TCGA): 6.0	Low region specificity	Detected in all			Not detected in immune cells	Not detected			Not detected	Not detected			Low cancer specificity	Detected in some			Adrenal gland - Adrenal cortex cells, Lung - Respiratory ciliated cells, Minor Salivary Gland - Minor salivary glandular cells, Prostate - Prostate glandular cells	Not detected	Not detected
LEPR	CD295, OBR	ENSG00000116678	Leptin receptor	P48357	1	65420652-65641559	Cancer-related genes, Candidate cardiovascular disease genes, CD markers, Disease related genes, FDA approved drug targets, Human disease related genes, Plasma proteins, Predicted membrane proteins		Receptor	Cancer-related genes, FDA approved drug targets, Obesity	Evidence at protein level	Evidence at transcript level	Evidence at protein level	Evidence at protein level	Tissue enriched	Detected in all	4	liver: 126.5	Cell type enhanced	Detected in many		Adipocytes: 97.7;Endothelial cells: 85.6;Fibroblasts: 91.9;Hepatocytes: 137.3;Microglial cells: 123.5	Group enriched	Detected in all	4	choroid plexus epithelial cell: 132.0;endothelial cell: 493.1;fibroblast: 492.0	Cancer enriched	Detected in many	5	Liver Hepatocellular Carcinoma (TCGA): 34.2	Low region specificity	Detected in all			Immune cell enhanced	Detected in some		basophil: 5.0	Lineage enriched	Detected in many	5	granulocytes: 5.0	Low cancer specificity	Detected in all			Prostate - Endothelial cells, Thyroid gland - Fibroblasts	Low region specificity	Detected in many
LGR4	GPR48	ENSG00000205213	Leucine rich repeat containing G protein-coupled receptor 4	Q9BXB1	11	27365961-27472790	Disease related genes, G-protein coupled receptors, Human disease related genes, Potential drug targets, Predicted intracellular proteins, Predicted membrane proteins	Biological rhythms, Differentiation, Immunity, Innate immunity, Spermatogenesis, Wnt signaling pathway	Developmental protein, G-protein coupled receptor, Receptor, Transducer	Osteoporosis	Evidence at protein level	Evidence at protein level	Evidence at protein level	Evidence at protein level	Low tissue specificity	Detected in all			Cell type enhanced	Detected in many		Astrocytes: 193.8;Glandular and luminal cells: 134.5;Syncytiotrophoblasts: 120.5	Cell type enhanced	Detected in all		bergmann glia: 615.4	Low cancer specificity	Detected in all			Low region specificity	Detected in all			Not detected in immune cells	Not detected			Not detected	Not detected			Low cancer specificity	Detected in all			Adipose visceral - Adipocytes (Visceral), Adrenal gland - Adrenal cortex cells, Minor Salivary Gland - Minor salivary gland basal cells, Skin - Outer root sheath cells, Testis - Sertoli cells, Thyroid gland - Thyroid glandular cells	Low region specificity	Detected in all
LGR5	FEX, GPR49, GPR67, HG38	ENSG00000139292	Leucine rich repeat containing G protein-coupled receptor 5	O75473	12	71439798-71586310	G-protein coupled receptors, Predicted membrane proteins		G-protein coupled receptor, Receptor, Transducer		Evidence at protein level	Evidence at transcript level	Evidence at protein level	Evidence at protein level	Tissue enhanced	Detected in many		fallopian tube: 16.3;placenta: 18.4;skeletal muscle: 21.5	Cell type enhanced	Detected in some		Cytotrophoblasts: 51.9;Glandular and luminal cells: 73.9;Oligodendrocyte precursor cells: 42.4;Oligodendrocytes: 97.7;Syncytiotrophoblasts: 25.1	Cell type enhanced	Detected in many		oligodendrocyte: 206.9;oligodendrocyte precursor cell: 85.7	Group enriched	Detected in many	5	Colon Adenocarcinoma (TCGA): 22.5;Ovary Serous Cystadenocarcinoma (TCGA): 11.6;Rectum Adenocarcinoma (TCGA): 24.5;Stomach Adenocarcinoma (TCGA): 7.6;Uterine Corpus Endometrial Carcinoma (TCGA): 27.2	Low region specificity	Detected in many			Not detected in immune cells	Not detected			Not detected	Not detected			Cancer enhanced	Detected in many		Neuroblastoma: 28.1	Adrenal gland - Adrenal cortex cells, Breast - Fibroblasts	Region enriched	Detected in many
LPAR3	Edg-7, EDG7, HOFNH30, LP-A3, LPA3, RP4-678I3	ENSG00000171517	Lysophosphatidic acid receptor 3	Q9UBY5	1	84811602-84893206	G-protein coupled receptors, Predicted membrane proteins		G-protein coupled receptor, Receptor, Transducer		Evidence at protein level	Evidence at protein level	Evidence at protein level	Evidence at protein level	Tissue enhanced	Detected in many		fallopian tube: 35.2	Cell type enhanced	Detected in many		Cardiomyocytes: 39.1;Ciliated cells: 27.0;Glandular and luminal cells: 50.5;Prostatic glandular cells: 58.8;Secretory cells: 21.1;Sertoli cells: 29.9	Cell type enriched	Detected in some	5	ependymal cell: 59.7	Cancer enhanced	Detected in many		Ovary Serous Cystadenocarcinoma (TCGA): 24.6	Low region specificity	Detected in all			Not detected in immune cells	Not detected			Not detected	Not detected			Cancer enhanced	Detected in many		prostate cancer: 21.4	Lung - Respiratory ciliated cells, Testis - Sertoli cells	Low region specificity	Detected in some
LRAT	LCA14	ENSG00000121207	Lecithin retinol acyltransferase	O95237	4	154626945-154753120	Disease related genes, Enzymes, Human disease related genes, Metabolic proteins, Potential drug targets, Predicted intracellular proteins, Predicted membrane proteins	Lipid metabolism, Sensory transduction, Vision	Acyltransferase, Transferase	Disease variant, Leber congenital amaurosis	Evidence at protein level	Evidence at transcript level	Evidence at protein level	Evidence at protein level	Tissue enhanced	Detected in some		liver: 2.1	Cell type enhanced	Detected in many		Early spermatids: 22.5;Granulosa cells: 31.5;Schwann cells: 48.8	Group enriched	Detected in many	5	astrocyte: 62.5;choroid plexus epithelial cell: 85.1	Low cancer specificity	Detected in some			Low region specificity	Detected in many			Immune cell enhanced	Detected in some		classical monocyte: 1.9	Low lineage specificity	Detected in many			Not detected	Not detected			Colon - Enteric glia cells, Lung - Alveolar cells type 2, Skin - Outer root sheath cells, Thyroid gland - Thyroid glandular cells	Not detected	Not detected
LRRC34	MGC27085	ENSG00000171757	Leucine rich repeat containing 34	Q8IZ02	3	169793003-169812986	Predicted intracellular proteins	Differentiation			Evidence at protein level	Evidence at transcript level	Evidence at transcript level	Evidence at protein level	Tissue enhanced	Detected in some		testis: 12.4	Cell type enhanced	Detected in many		Ciliated cells: 65.7;Cone photoreceptor cells: 37.4;Early spermatids: 189.8;Spermatocytes: 89.8	Cell type enhanced	Detected in all		ependymal cell: 92.3	Low cancer specificity	Detected in some			Low region specificity	Detected in all			Immune cell enhanced	Detected in single		plasmacytoid DC: 1.6	Low lineage specificity	Detected in single			Low cancer specificity	Detected in many			Lung - Respiratory ciliated cells, Prostate - Fibroblasts, Testis - Early spermatids	Low region specificity	Detected in some
LRRC45	MGC20806	ENSG00000169683	Leucine rich repeat containing 45	Q96CN5	17	82023305-82031151	Predicted intracellular proteins				Evidence at protein level	Evidence at protein level	Evidence at protein level	Evidence at protein level	Low tissue specificity	Detected in many			Cell type enhanced	Detected in many		Ciliated cells: 33.3;Extravillous trophoblasts: 31.0	Cell type enhanced	Detected in many		ependymal cell: 20.1	Low cancer specificity	Detected in all			Low region specificity	Detected in all			Low immune cell specificity	Detected in many			Low lineage specificity	Detected in many			Low cancer specificity	Detected in all				Low region specificity	Detected in all
LRRC46	MGC16309	ENSG00000141294	Leucine rich repeat containing 46	Q96FV0	17	47831634-47837719	Predicted intracellular proteins				Evidence at protein level	Evidence at protein level	Evidence at transcript level	Evidence at protein level	Tissue enhanced	Detected in some		fallopian tube: 75.9;testis: 52.7	Group enriched	Detected in some	4	Ciliated cells: 204.1;Early spermatids: 174.4;Late spermatids: 61.0;Spermatocytes: 102.1	Cell type enriched	Detected in some	9	ependymal cell: 107.0	Cancer enhanced	Detected in many		Uterine Corpus Endometrial Carcinoma (TCGA): 10.8	Low region specificity	Detected in all			Low immune cell specificity	Detected in single			Low lineage specificity	Detected in single			Low cancer specificity	Detected in single			Breast - Breast glandular cells, Lung - Respiratory ciliated cells, Testis - Early spermatids, Testis - Late spermatids	Low region specificity	Detected in many
LRRK2	DKFZp434H2111, FLJ45829, PARK8, RIPK7, ROCO2	ENSG00000188906	Leucine rich repeat kinase 2	Q5S007	12	40196744-40369285	Cancer-related genes, Disease related genes, Enzymes, Human disease related genes, Potential drug targets, Predicted intracellular proteins, Transporters	Autophagy, Differentiation	GTPase activation, Hydrolase, Kinase, Serine/threonine-protein kinase, Transferase	Cancer-related genes, Disease variant, Neurodegeneration, Parkinson disease, Parkinsonism	Evidence at protein level	Evidence at protein level	Evidence at protein level	Evidence at protein level	Tissue enriched	Detected in many	5	lung: 50.8	Cell type enhanced	Detected in many		Alveolar cells type 2: 767.5;monocytes: 185.4;Oligodendrocyte precursor cells: 241.0;Skeletal myocytes: 246.9	Cell type enhanced	Detected in all		oligodendrocyte precursor cell: 470.3	Group enriched	Detected in many	6	Kidney Renal Clear Cell Carcinoma (TCGA): 18.6;Kidney Renal Papillary Cell Carcinoma (TCGA): 32.9;Lung Adenocarcinoma (TCGA): 10.2;Thyroid Carcinoma (TCGA): 27.8	Low region specificity	Detected in all			Immune cell enriched	Detected in many	8	neutrophil: 58.3	Lineage enriched	Detected in many	8	granulocytes: 58.3	Cancer enhanced	Detected in some		Kidney cancer: 3.3;lymphoma: 3.2;skin cancer: 3.4	Adrenal gland - Adrenal cortex cells, Breast - Fibroblasts, Liver - Hepatocytes, Lung - Alveolar cells type 2, Prostate - Fibroblasts, Spleen - Neutrophils	Low region specificity	Detected in all
LRRN1	FIGLER3	ENSG00000175928	Leucine rich repeat neuronal 1	Q6UXK5	3	3799431-3849834	Predicted membrane proteins				Evidence at protein level	Evidence at protein level	Evidence at protein level	Evidence at protein level	Tissue enhanced	Detected in many		brain: 16.2	Cell type enriched	Detected in many	6	Oligodendrocyte precursor cells: 392.4	Cell type enhanced	Detected in all		oligodendrocyte precursor cell: 626.8	Cancer enhanced	Detected in many		Glioblastoma Multiforme (TCGA): 19.2	Low region specificity	Detected in all			Not detected in immune cells	Not detected			Not detected	Not detected			Cancer enriched	Detected in many	12	testis cancer: 96.2	Adipose visceral - Mesothelial cells, Testis - Sertoli cells	Low region specificity	Detected in all
LZTFL1	BBS17	ENSG00000163818	Leucine zipper transcription factor like 1	Q9NQ48	3	45823316-45916042	Disease related genes, Human disease related genes, Predicted intracellular proteins			Bardet-Biedl syndrome, Ciliopathy, Disease variant, Obesity	Evidence at protein level	Evidence at protein level	Evidence at protein level	Evidence at protein level	Low tissue specificity	Detected in many			Cell type enhanced	Detected in all		Ciliated cells: 67.6;Early spermatids: 172.7;Spermatocytes: 145.4	Low cell type specificity	Detected in all			Low cancer specificity	Detected in all			Low region specificity	Detected in all			Low immune cell specificity	Detected in some			Low lineage specificity	Detected in many			Low cancer specificity	Detected in many			Testis - Early spermatids, Thyroid gland - Thyroid glandular cells	Low region specificity	Detected in all
MACF1	ABP620, ACF7, FLJ45612, FLJ46776, KIAA0465, KIAA0754, KIAA1251, Lnc-PMIF, MACF	ENSG00000127603	Microtubule actin crosslinking factor 1	Q9UPN3	1	39081316-39487177	Disease related genes, Human disease related genes, Potential drug targets, Predicted intracellular proteins, Predicted membrane proteins, Transporters	Wnt signaling pathway	Actin-binding	Disease variant, Lissencephaly	Evidence at protein level	Evidence at protein level	Evidence at protein level	Evidence at protein level	Low tissue specificity	Detected in all			Cell type enhanced	Detected in many		Astrocytes: 1023.3	Low cell type specificity	Detected in all			Low cancer specificity	Detected in all			Low region specificity	Detected in all			Low immune cell specificity	Detected in many			Low lineage specificity	Detected in all			Low cancer specificity	Detected in all			Adrenal gland - Adrenal cortex cells, Prostate - Smooth muscle cells	Low region specificity	Detected in all
MACIR	C5orf30, FLJ25291	ENSG00000181751	Macrophage immunometabolism regulator	Q96GV9	5	103258763-103278660	Predicted intracellular proteins	Cilium biogenesis/degradation, Inflammatory response, Protein transport, Transport			Evidence at protein level	Evidence at transcript level	Evidence at protein level	Evidence at protein level	Tissue enhanced	Detected in all		bone marrow: 31.0	Cell type enhanced	Detected in many		Distal enterocytes: 69.8;Extravillous trophoblasts: 118.6;Muller glia cells: 58.2	Low cell type specificity	Detected in all			Low cancer specificity	Detected in all			Low region specificity	Detected in all			Immune cell enriched	Detected in all	5	basophil: 37.8	Lineage enriched	Detected in all	5	granulocytes: 37.8	Low cancer specificity	Detected in all			Adipose subcutaneous - Adipocytes (Subcutaneous), Adipose visceral - Adipocytes (Visceral), Spleen - Neutrophils, Stomach - Gastric mucous cells	Low region specificity	Detected in all
MAK	dJ417M14.2, RP62	ENSG00000111837	Male germ cell associated kinase	P20794	6	10762723-10838553	Disease related genes, Enzymes, Human disease related genes, Plasma proteins, Potential drug targets, Predicted intracellular proteins	Differentiation, Spermatogenesis, Transcription, Transcription regulation	Developmental protein, Kinase, Serine/threonine-protein kinase, Transferase	Disease variant, Retinitis pigmentosa	Evidence at protein level	Evidence at transcript level	Evidence at protein level	Evidence at protein level	Tissue enriched	Detected in some	16	retina: 115.3	Cell type enhanced	Detected in many		Cone photoreceptor cells: 249.8;Early spermatids: 90.6;Late spermatids: 68.6;Rod photoreceptor cells: 314.6	Low cell type specificity	Detected in all			Low cancer specificity	Detected in single			Low region specificity	Detected in all			Immune cell enriched	Detected in single	9	neutrophil: 6.3	Lineage enriched	Detected in single	9	granulocytes: 6.3	Low cancer specificity	Detected in single			Lung - Respiratory ciliated cells, Spleen - Neutrophils, Testis - Early spermatids, Testis - Late spermatids	Low region specificity	Detected in many
MAL	MVP17, VIP17	ENSG00000172005	Mal, T cell differentiation protein	P21145	2	95025677-95053992	Predicted membrane proteins, Transporters				Evidence at protein level	Evidence at transcript level	Evidence at protein level	Evidence at protein level	Tissue enhanced	Detected in many		esophagus: 2738.8;vagina: 837.1	Cell type enriched	Detected in many	4	Suprabasal keratinocytes: 1681.5	Group enriched	Detected in many	5	committed oligodendrocyte precursor: 96.2;oligodendrocyte: 286.7	Group enriched	Detected in many	5	Kidney Chromophobe (TCGA): 544.4;Kidney Renal Papillary Cell Carcinoma (TCGA): 343.1	Low region specificity	Detected in all			Group enriched	Detected in many	6	memory CD4 T-cell: 218.3;naive CD4 T-cell: 294.2;naive CD8 T-cell: 138.5;T-reg: 234.3	Lineage enriched	Detected in many	38	T-cells: 294.2	Cancer enhanced	Detected in many		Leukemia: 35.0;ovarian cancer: 68.6;Uterine cancer: 46.9	Adipose subcutaneous - Smooth muscle cells, Adrenal gland - Schwann cells, Lung - Fibroblast_1, Skin - Eccrine sweat gland cells	Low region specificity	Detected in all
MAP1LC3A	ATG8E, LC3, LC3A, MAP1ALC3, MAP1BLC3	ENSG00000101460	Microtubule associated protein 1 light chain 3 alpha	Q9H492	20	34546854-34560345	Predicted intracellular proteins	Autophagy, Ubl conjugation pathway			Evidence at protein level	Evidence at protein level	Evidence at protein level	Evidence at protein level	Low tissue specificity	Detected in all			Cell type enhanced	Detected in all		Late spermatids: 653.2;Syncytiotrophoblasts: 283.3	Low cell type specificity	Detected in all			Low cancer specificity	Detected in all			Low region specificity	Detected in all			Immune cell enriched	Detected in all	7	neutrophil: 85.9	Lineage enriched	Detected in all	7	granulocytes: 85.9	Low cancer specificity	Detected in many			Skin - Keratinocyte (granular)	Low region specificity	Detected in all
MAP1LC3B	ATG8F	ENSG00000140941	Microtubule associated protein 1 light chain 3 beta	Q9GZQ8	16	87383953-87404779	Predicted intracellular proteins	Autophagy, Ubl conjugation pathway			Evidence at protein level	Evidence at transcript level	Evidence at protein level	Evidence at protein level	Low tissue specificity	Detected in all			Cell type enhanced	Detected in all		Syncytiotrophoblasts: 716.5	Low cell type specificity	Detected in all			Low cancer specificity	Detected in all			Low region specificity	Detected in all			Low immune cell specificity	Detected in all			Low lineage specificity	Detected in all			Low cancer specificity	Detected in all			Kidney - Endothelial cells, Testis - Early spermatids, Testis - Spermatocytes
MAP1LC3B2	ATG8G	ENSG00000258102	Microtubule associated protein 1 light chain 3 beta 2	A6NCE7	12	116548105-116576606	Predicted intracellular proteins	Autophagy, Ubl conjugation pathway			Evidence at protein level	Evidence at transcript level	Evidence at protein level	Evidence at transcript level	Tissue enhanced	Detected in many		brain: 6.0	Cell type enhanced	Detected in many		Astrocytes: 10.2;Inhibitory neurons: 8.2	Cell type enhanced	Detected in many		upper rhombic lip: 40.6	Low cancer specificity	Detected in all			Low region specificity	Detected in all			Low immune cell specificity	Detected in all			Low lineage specificity	Detected in all			Low cancer specificity	Detected in many
MAP2	MAP2A, MAP2B, MAP2C	ENSG00000078018	Microtubule associated protein 2	P11137	2	209424047-209734147	FDA approved drug targets, Plasma proteins, Predicted intracellular proteins		Calmodulin-binding	FDA approved drug targets	Evidence at protein level	Evidence at protein level	Evidence at protein level	Evidence at protein level	Group enriched	Detected in many	10	brain: 269.8;retina: 397.0	Group enriched	Detected in many	4	Cone photoreceptor cells: 863.2;Excitatory neurons: 853.5;Inhibitory neurons: 789.0;Oligodendrocyte precursor cells: 646.2;Rod photoreceptor cells: 515.2	Low cell type specificity	Detected in all			Cancer enhanced	Detected in many		Glioblastoma Multiforme (TCGA): 82.9	Low region specificity	Detected in all			Not detected in immune cells	Not detected			Not detected	Not detected			Cancer enhanced	Detected in many		Neuroblastoma: 63.9	Pituitary gland - Undifferentiated cells (Pituitary gland)	Low region specificity	Detected in all
MAP2K1	MAPKK1, MEK1, PRKMK1	ENSG00000169032	Mitogen-activated protein kinase kinase 1	Q02750	15	66386837-66491656	Cancer-related genes, Disease related genes, Enzymes, FDA approved drug targets, Human disease related genes, Predicted intracellular proteins, RAS pathway related proteins		Kinase, Serine/threonine-protein kinase, Transferase, Tyrosine-protein kinase	Cancer-related genes, Cardiomyopathy, Disease variant, Ectodermal dysplasia, FDA approved drug targets, Intellectual disability	Evidence at protein level	Evidence at protein level	Evidence at protein level	Evidence at protein level	Low tissue specificity	Detected in all			Cell type enhanced	Detected in all		Hepatocytes: 182.8;Langerhans cells: 316.8;monocytes: 356.2	Low cell type specificity	Detected in all			Low cancer specificity	Detected in all			Low region specificity	Detected in all			Low immune cell specificity	Detected in all			Low lineage specificity	Detected in all			Low cancer specificity	Detected in all			Testis - Spermatogonia	Low region specificity	Detected in all
MAP2K5	HsT17454, MAPKK5, MEK5, PRKMK5	ENSG00000137764	Mitogen-activated protein kinase kinase 5	Q13163	15	67542703-67807117	Enzymes, Predicted intracellular proteins		Kinase, Serine/threonine-protein kinase, Transferase, Tyrosine-protein kinase		Evidence at protein level	Evidence at protein level	Evidence at protein level	Evidence at protein level	Low tissue specificity	Detected in all			Group enriched	Detected in many	7	Astrocytes: 113.3;Early spermatids: 124.1;Excitatory neurons: 194.7;Inhibitory neurons: 162.3;Late spermatids: 216.9;Microglial cells: 83.2;Oligodendrocyte precursor cells: 137.3;Oligodendrocytes: 136.4	Low cell type specificity	Detected in all			Low cancer specificity	Detected in all			Low region specificity	Detected in all			Low immune cell specificity	Detected in all			Low lineage specificity	Detected in all			Low cancer specificity	Detected in all				Low region specificity	Detected in all
MAP4		ENSG00000047849	Microtubule associated protein 4	P27816	3	47850690-48089272	FDA approved drug targets, Plasma proteins, Predicted intracellular proteins			FDA approved drug targets	Evidence at protein level	Evidence at protein level	Evidence at protein level	Evidence at protein level	Tissue enhanced	Detected in all		brain: 872.8;skeletal muscle: 717.7	Group enriched	Detected in all	4	Bipolar cells: 347.9;Cardiomyocytes: 1225.2;Cone photoreceptor cells: 486.0;Skeletal myocytes: 561.1	Low cell type specificity	Detected in all			Low cancer specificity	Detected in all			Low region specificity	Detected in all			Low immune cell specificity	Detected in all			Low lineage specificity	Detected in all			Low cancer specificity	Detected in all			Breast - Endothelial cells	Low region specificity	Detected in all
MAP4K5	GCKR, KHS, KHS1	ENSG00000012983	Mitogen-activated protein kinase kinase kinase kinase 5	Q9Y4K4	14	50418501-50561126	Enzymes, Predicted intracellular proteins		Kinase, Serine/threonine-protein kinase, Transferase		Evidence at protein level	Evidence at protein level	Evidence at protein level	Evidence at protein level	Low tissue specificity	Detected in all			Cell type enhanced	Detected in all		Oligodendrocyte precursor cells: 312.2;Oligodendrocytes: 658.2	Cell type enhanced	Detected in all		oligodendrocyte: 1145.1	Low cancer specificity	Detected in all			Low region specificity	Detected in all			Group enriched	Detected in many	6	basophil: 18.9;eosinophil: 5.5	Lineage enriched	Detected in many	9	granulocytes: 18.9	Low cancer specificity	Detected in all			Spleen - Endothelial cells	Low region specificity	Detected in all
MAP7D3	FLJ12649	ENSG00000129680	MAP7 domain containing 3	Q8IWC1	X	136213220-136256482	Predicted intracellular proteins				Evidence at protein level	Evidence at transcript level	Evidence at protein level	Evidence at protein level	Low tissue specificity	Detected in all			Cell type enhanced	Detected in many		Early spermatids: 259.8;Extravillous trophoblasts: 110.5;Late spermatids: 294.3;Oocytes: 127.9	Cell type enhanced	Detected in many		vascular associated smooth muscle cell: 59.4	Low cancer specificity	Detected in all			Low region specificity	Detected in all			Low immune cell specificity	Detected in many			Low lineage specificity	Detected in all			Low cancer specificity	Detected in many			Adrenal gland - Fibroblasts, Minor Salivary Gland - Endothelial cells	Not detected	Not detected
MAP9	ASAP, FLJ21159	ENSG00000164114	Microtubule associated protein 9	Q49MG5	4	155342658-155376970	Predicted intracellular proteins	Cell cycle, Cell division, Mitosis			Evidence at protein level	Evidence at transcript level	Evidence at protein level	Evidence at protein level	Tissue enhanced	Detected in many		parathyroid gland: 32.8	Cell type enhanced	Detected in many		Ciliated cells: 122.0	Low cell type specificity	Detected in all			Low cancer specificity	Detected in many			Low region specificity	Detected in all			Low immune cell specificity	Detected in many			Low lineage specificity	Detected in many			Cancer enhanced	Detected in many		prostate cancer: 32.1	Testis - Spermatocytes, Testis - Spermatogonia, Thyroid gland - Thyroid glandular cells	Low region specificity	Detected in all
MAPK1	ERK, ERK2, MAPK2, p41mapk, PRKM1, PRKM2	ENSG00000100030	Mitogen-activated protein kinase 1	P28482	22	21759657-21867680	Cancer-related genes, Disease related genes, Enzymes, FDA approved drug targets, Human disease related genes, Plasma proteins, Predicted intracellular proteins, RAS pathway related proteins	Apoptosis, Cell cycle, Host-virus interaction, Transcription, Transcription regulation	DNA-binding, Kinase, Repressor, Serine/threonine-protein kinase, Transferase	Cancer-related genes, Disease variant, FDA approved drug targets	Evidence at protein level	Evidence at protein level	Evidence at protein level	Evidence at protein level	Low tissue specificity	Detected in all			Cell type enhanced	Detected in all		NK-cells: 204.3	Low cell type specificity	Detected in all			Low cancer specificity	Detected in all			Low region specificity	Detected in all			Low immune cell specificity	Detected in all			Low lineage specificity	Detected in all			Low cancer specificity	Detected in all			Adrenal gland - Adrenal cortex cells, Skin - Keratinocyte (other), Thyroid gland - Thyroid glandular cells	Low region specificity	Detected in all
MAPK3	ERK1, p44erk1, p44mapk, PRKM3	ENSG00000102882	Mitogen-activated protein kinase 3	P27361	16	30114105-30123506	Cancer-related genes, Enzymes, FDA approved drug targets, Predicted intracellular proteins, RAS pathway related proteins	Apoptosis, Cell cycle, Host-virus interaction	Kinase, Serine/threonine-protein kinase, Transferase	Cancer-related genes, FDA approved drug targets	Evidence at protein level	Evidence at protein level	Evidence at protein level	Evidence at protein level	Low tissue specificity	Detected in all			Cell type enhanced	Detected in all		Distal enterocytes: 313.7;Late spermatids: 263.1;Proximal enterocytes: 227.4	Low cell type specificity	Detected in all			Low cancer specificity	Detected in all			Low region specificity	Detected in all			Group enriched	Detected in all	5	eosinophil: 49.2;neutrophil: 21.6	Lineage enriched	Detected in all	7	granulocytes: 49.2	Low cancer specificity	Detected in all			Testis - Spermatogonia	Low region specificity	Detected in all
MAPK6	ERK3, HsT17250, p97MAPK, PRKM6	ENSG00000069956	Mitogen-activated protein kinase 6	Q16659	15	51952106-52067375	Enzymes, Predicted intracellular proteins	Cell cycle	Kinase, Serine/threonine-protein kinase, Transferase		Evidence at protein level	Evidence at protein level	Evidence at protein level	Evidence at protein level	Low tissue specificity	Detected in all			Cell type enhanced	Detected in all		Late spermatids: 225.7	Low cell type specificity	Detected in all			Low cancer specificity	Detected in all			Low region specificity	Detected in all			Low immune cell specificity	Detected in many			Low lineage specificity	Detected in all			Low cancer specificity	Detected in all			Skin - Keratinocyte (other), Testis - Early spermatids	Low region specificity	Detected in all
MAPKAP1	MGC2745, MIP1, SIN1	ENSG00000119487	MAPK associated protein 1	Q9BPZ7	9	125437393-125707234	Predicted intracellular proteins	Stress response			Evidence at protein level	Evidence at protein level	Evidence at protein level	Evidence at protein level	Low tissue specificity	Detected in all			Low cell type specificity	Detected in all			Low cell type specificity	Detected in all			Low cancer specificity	Detected in all			Low region specificity	Detected in all			Low immune cell specificity	Detected in all			Low lineage specificity	Detected in all			Low cancer specificity	Detected in all			Adipose subcutaneous - Adipocytes (Subcutaneous), Adrenal gland - Adrenal cortex cells, Testis - Early spermatids, Thyroid gland - Thyroid glandular cells	Low region specificity	Detected in all
MAPKAPK2	MK2	ENSG00000162889	MAPK activated protein kinase 2	P49137	1	206684905-206734281	Cancer-related genes, Enzymes, Predicted membrane proteins	DNA damage	Kinase, Serine/threonine-protein kinase, Transferase	Cancer-related genes	Evidence at protein level	Evidence at protein level	Evidence at protein level	Evidence at protein level	Low tissue specificity	Detected in all			Cell type enhanced	Detected in all		dendritic cells: 267.0	Low cell type specificity	Detected in all			Low cancer specificity	Detected in all			Low region specificity	Detected in all			Immune cell enriched	Detected in many	6	plasmacytoid DC: 21.9	Lineage enriched	Detected in all	6	dendritic cells: 21.9	Low cancer specificity	Detected in all			Testis - Late spermatids	Low region specificity	Detected in all
MAPRE1	EB1	ENSG00000101367	Microtubule associated protein RP/EB family member 1	Q15691	20	32819954-32850405	Plasma proteins, Predicted intracellular proteins	Cell cycle, Cell division, Mitosis			Evidence at protein level	Evidence at protein level	Evidence at protein level	Evidence at protein level	Low tissue specificity	Detected in all			Low cell type specificity	Detected in all			Low cell type specificity	Detected in all			Low cancer specificity	Detected in all			Low region specificity	Detected in all			Low immune cell specificity	Detected in all			Low lineage specificity	Detected in all			Low cancer specificity	Detected in all			Spleen - Macrophages, Thyroid gland - Thyroid glandular cells	Low region specificity	Detected in all
MARCHF7	AXOT, MARCH-VII, MARCH7, RNF177	ENSG00000136536	Membrane associated ring-CH-type finger 7	Q9H992	2	159712457-159771027	Enzymes, Metabolic proteins, Predicted intracellular proteins	Ubl conjugation pathway	Transferase		Evidence at protein level	Evidence at protein level	Evidence at protein level	Evidence at protein level	Low tissue specificity	Detected in all			Cell type enhanced	Detected in all		Early spermatids: 299.1	Low cell type specificity	Detected in all			Low cancer specificity	Detected in all			Low region specificity	Detected in all			Low immune cell specificity	Detected in all			Low lineage specificity	Detected in all			Low cancer specificity	Detected in all			Testis - Early spermatids, Testis - Spermatocytes	Low region specificity	Detected in all
MARCKS	80K-L, MACS, PKCSL	ENSG00000277443	Myristoylated alanine rich protein kinase C substrate	P29966	6	113857345-113863475	Plasma proteins, Predicted intracellular proteins		Actin-binding, Calmodulin-binding		Evidence at protein level	Evidence at protein level	Evidence at protein level	Evidence at protein level	Low tissue specificity	Detected in all			Cell type enhanced	Detected in all		monocytes: 1068.0	Cell type enhanced	Detected in all		oligodendrocyte precursor cell: 489.9	Low cancer specificity	Detected in all			Low region specificity	Detected in all			Immune cell enhanced	Detected in many		intermediate monocyte: 12.8;neutrophil: 18.8	Low lineage specificity	Detected in many			Low cancer specificity	Detected in all			Adrenal gland - Endothelial cells, Spleen - Fibroblast_1, Thyroid gland - Fibroblasts	Low region specificity	Detected in all
MCM2	BM28, CCNL1, cdc19, CDCL1, D3S3194, DFNA70, KIAA0030	ENSG00000073111	Minichromosome maintenance complex component 2	P49736	3	127598410-127622436	Cancer-related genes, Disease related genes, Enzymes, Human disease related genes, Plasma proteins, Potential drug targets, Predicted intracellular proteins	Cell cycle, DNA replication	DNA-binding, Helicase, Hydrolase	Cancer-related genes, Deafness, Disease variant, Non-syndromic deafness	Evidence at protein level	Evidence at protein level	Evidence at protein level	Evidence at protein level	Tissue enhanced	Detected in all		bone marrow: 66.8;lymphoid tissue: 36.6	Cell type enhanced	Detected in many		Cytotrophoblasts: 62.9;Erythroid cells: 71.0;Extravillous trophoblasts: 24.4;Plasma cells: 24.8;Spermatogonia: 24.7;Syncytiotrophoblasts: 29.3	Low cell type specificity	Detected in some			Low cancer specificity	Detected in all			Low region specificity	Detected in all			Low immune cell specificity	Detected in many			Low lineage specificity	Detected in all			Low cancer specificity	Detected in all			Adipose subcutaneous - Adipose progenitor cells, Lung - Mitotic cells (Lung), Skin - Mitotic cells (Skin), Spleen - Mitotic cells (Spleen), Stomach - Mitotic cells (Stomach), Testis - Spermatocytes, Testis - Spermatogonia, Thyroid gland - Thyroid glandular cells	Low region specificity	Detected in all
MCM7	CDC47, MCM2, PPP1R104	ENSG00000166508	Minichromosome maintenance complex component 7	P33993	7	100092728-100101940	Cancer-related genes, Enzymes, Plasma proteins, Predicted intracellular proteins	Cell cycle, DNA replication	DNA-binding, Helicase, Hydrolase	Cancer-related genes	Evidence at protein level	Evidence at protein level	Evidence at protein level	Evidence at protein level	Tissue enhanced	Detected in all		bone marrow: 178.5;lymphoid tissue: 152.3	Cell type enhanced	Detected in all		Cytotrophoblasts: 137.1;Erythroid cells: 184.2;Undifferentiated cells: 123.7	Low cell type specificity	Detected in all			Low cancer specificity	Detected in all			Low region specificity	Detected in all			Low immune cell specificity	Detected in all			Low lineage specificity	Detected in all			Low cancer specificity	Detected in all			Testis - Spermatocytes	Low region specificity	Detected in all
MIB1	DIP-1, KIAA1323, MIB, ZZANK2, ZZZ6	ENSG00000101752	MIB E3 ubiquitin protein ligase 1	Q86YT6	18	21704957-21870953	Disease related genes, Enzymes, Human disease related genes, Metabolic proteins, Potential drug targets, Predicted intracellular proteins	Notch signaling pathway, Ubl conjugation pathway	Transferase	Cardiomyopathy, Disease variant	Evidence at protein level	Evidence at protein level	Evidence at protein level	Evidence at protein level	Low tissue specificity	Detected in all			Cell type enhanced	Detected in many		Excitatory neurons: 103.1;Oligodendrocyte precursor cells: 113.7	Low cell type specificity	Detected in all			Low cancer specificity	Detected in all			Low region specificity	Detected in all			Not detected in immune cells	Not detected			Not detected	Not detected			Low cancer specificity	Detected in all			Testis - Spermatocytes	Low region specificity	Detected in all
MICAL1	DKFZp434B1517, FLJ11937, FLJ21739, MICAL, NICAL	ENSG00000135596	Microtubule associated monooxygenase, calponin and LIM domain containing 1	Q8TDZ2	6	109444062-109465968	Enzymes, Predicted intracellular proteins		Actin-binding, Monooxygenase, Oxidoreductase		Evidence at protein level	Evidence at transcript level	Evidence at protein level	Evidence at protein level	Low tissue specificity	Detected in all			Cell type enhanced	Detected in many		Gastric mucus-secreting cells: 65.4;monocytes: 59.4	Low cell type specificity	Detected in all			Low cancer specificity	Detected in all			Low region specificity	Detected in all			Low immune cell specificity	Detected in all			Low lineage specificity	Detected in all			Low cancer specificity	Detected in all				Low region specificity	Detected in all
MKKS	BBS6	ENSG00000125863	MKKS centrosomal shuttling protein	Q9NPJ1	20	10401009-10434222	Disease related genes, Human disease related genes, Predicted intracellular proteins	Sensory transduction, Vision	Chaperone	Bardet-Biedl syndrome, Ciliopathy, Disease variant, Intellectual disability, Obesity	Evidence at protein level	Evidence at protein level	Evidence at protein level	Evidence at protein level	Low tissue specificity	Detected in all			Cell type enhanced	Detected in all		Squamous epithelial cells: 88.6	Low cell type specificity	Detected in all			Low cancer specificity	Detected in all			Low region specificity	Detected in all			Low immune cell specificity	Detected in all			Low lineage specificity	Detected in all			Low cancer specificity	Detected in all			Testis - Early spermatids	Low region specificity	Detected in all
MKS1	BBS13, FLJ20345, MKS, POC12	ENSG00000011143	MKS transition zone complex subunit 1	Q9NXB0	17	58205441-58219605	Disease related genes, Human disease related genes, Potential drug targets, Predicted intracellular proteins, Transporters	Cilium biogenesis/degradation		Bardet-Biedl syndrome, Ciliopathy, Disease variant, Intellectual disability, Joubert syndrome, Meckel syndrome, Obesity	Evidence at protein level	Evidence at protein level	Evidence at protein level	Evidence at protein level	Low tissue specificity	Detected in all			Cell type enhanced	Detected in many		Ciliated cells: 31.8	Low cell type specificity	Detected in all			Low cancer specificity	Detected in all			Low region specificity	Detected in all			Low immune cell specificity	Detected in all			Low lineage specificity	Detected in all			Low cancer specificity	Detected in all			Testis - Spermatocytes	Low region specificity	Detected in all
MLF1		ENSG00000178053	Myeloid leukemia factor 1	P58340	3	158571163-158607252	Cancer-related genes, Disease related genes, Predicted intracellular proteins	Cell cycle, Differentiation	Developmental protein, DNA-binding	Cancer-related genes	Evidence at protein level	Evidence at protein level	Evidence at protein level	Evidence at protein level	Tissue enhanced	Detected in all		skeletal muscle: 175.9;testis: 382.7	Group enriched	Detected in many	11	Early spermatids: 3819.1;Late spermatids: 13402.5	Cell type enhanced	Detected in all		ependymal cell: 307.6	Low cancer specificity	Detected in all			Low region specificity	Detected in all			Immune cell enhanced	Detected in many		T-reg: 8.8	Lineage enriched	Detected in single	9	T-cells: 8.8	Low cancer specificity	Detected in all			Heart muscle - Cardiomyocytes, Lung - Respiratory ciliated cells, Skeletal muscle - Skeletal myocytes, Skeletal muscle - Skeletal myocytes, Testis - Early spermatids, Testis - Late spermatids	Low region specificity	Detected in all
MME	CALLA, CD10, NEP	ENSG00000196549	Membrane metalloendopeptidase	P08473	3	155024124-155183704	Cancer-related genes, Candidate cardiovascular disease genes, CD markers, Disease related genes, Enzymes, FDA approved drug targets, Human disease related genes, Plasma proteins, Predicted intracellular proteins, Predicted membrane proteins		Hydrolase, Metalloprotease, Protease	Cancer-related genes, Charcot-Marie-Tooth disease, Disease variant, FDA approved drug targets, Neurodegeneration, Neuropathy, Spinocerebellar ataxia	Evidence at protein level	Evidence at protein level	Evidence at protein level	Evidence at protein level	Tissue enhanced	Detected in many		intestine: 324.3;kidney: 292.0	Cell type enhanced	Detected in many		Breast myoepithelial cells: 76.6;Cytotrophoblasts: 78.8;Endometrial stromal cells: 269.5;Prostatic glandular cells: 119.5;Proximal enterocytes: 322.6;Syncytiotrophoblasts: 127.2	Group enriched	Detected in many	7	lower rhombic lip: 200.6;medium spiny neuron: 247.5	Low cancer specificity	Detected in many			Region enhanced	Detected in all		basal ganglia: 37.9	Immune cell enriched	Detected in some	123	neutrophil: 139.9	Lineage enriched	Detected in many	123	granulocytes: 139.9	Low cancer specificity	Detected in many			Adipose visceral - Adipocytes (Visceral), Heart muscle - Fibroblasts, Kidney - Podocytes, Liver - Hepatocytes, Prostate - Prostate glandular cells	Region enhanced	Detected in many
MNS1	FLJ11222, SPATA40	ENSG00000138587	Meiosis specific nuclear structural 1	Q8NEH6	15	56421544-56465137	Disease related genes, Human disease related genes, Predicted intracellular proteins	Meiosis		Disease variant, Heterotaxy	Evidence at protein level	Evidence at transcript level	Evidence at protein level	Evidence at protein level	Tissue enhanced	Detected in many		choroid plexus: 22.0;fallopian tube: 20.6;testis: 46.8	Group enriched	Detected in many	8	Ciliated cells: 218.8;Early spermatids: 734.7;Oocytes: 204.4;Spermatocytes: 212.7	Cell type enhanced	Detected in all		ependymal cell: 263.8	Low cancer specificity	Detected in all			Low region specificity	Detected in all			Not detected in immune cells	Not detected			Not detected	Not detected			Low cancer specificity	Detected in many			Lung - Respiratory ciliated cells, Testis - Early spermatids, Testis - Late spermatids, Thyroid gland - Fibroblasts	Low region specificity	Detected in many
MPDZ	MUPP1	ENSG00000107186	Multiple PDZ domain crumbs cell polarity complex component	O75970	9	13105706-13279692	Disease related genes, Human disease related genes, Plasma proteins, Predicted intracellular proteins	Host-virus interaction			Evidence at protein level	Evidence at transcript level	Evidence at protein level	Evidence at protein level	Tissue enhanced	Detected in many		liver: 83.1	Cell type enhanced	Detected in many		Astrocytes: 115.2;Cardiomyocytes: 148.6;Excitatory neurons: 206.4;Inhibitory neurons: 259.6;Oligodendrocyte precursor cells: 149.0;Oligodendrocytes: 260.3	Low cell type specificity	Detected in all			Low cancer specificity	Detected in all			Low region specificity	Detected in all			Not detected in immune cells	Not detected			Not detected	Not detected			Low cancer specificity	Detected in many			Liver - Hepatocytes, Prostate - Smooth muscle cells, Skin - Endothelial cells	Low region specificity	Detected in all
MPHOSPH9	MPP9	ENSG00000051825	M-phase phosphoprotein 9	Q99550	12	123152320-123244014	Predicted intracellular proteins				Evidence at protein level	Evidence at transcript level	Evidence at protein level	Evidence at protein level	Tissue enhanced	Detected in all		lymphoid tissue: 31.9	Cell type enhanced	Detected in all		Excitatory neurons: 84.8;Inhibitory neurons: 81.3;Late spermatids: 73.7;Rod photoreceptor cells: 62.5	Low cell type specificity	Detected in all			Low cancer specificity	Detected in all			Low region specificity	Detected in all			Low immune cell specificity	Detected in many			Low lineage specificity	Detected in all			Low cancer specificity	Detected in all			Testis - Early spermatids	Low region specificity	Detected in all
MRGPRF	GPR140, GPR168, MGC21621, mrgF	ENSG00000172935	MAS related GPR family member F	Q96AM1	11	69004395-69013382	G-protein coupled receptors, Predicted intracellular proteins, Predicted membrane proteins, Transporters		G-protein coupled receptor, Receptor, Transducer		Evidence at protein level	Evidence at transcript level	Evidence at transcript level	Evidence at protein level	Tissue enhanced	Detected in many		endometrium 1: 165.4;intestine: 153.8	Cell type enhanced	Detected in many		Fibroblasts: 30.0;Leydig cells: 66.2;Mesothelial cells: 31.1;Ovarian stromal cells: 29.9;Peritubular cells: 97.6;Smooth muscle cells: 96.5	Group enriched	Detected in some	5	fibroblast: 26.4;vascular associated smooth muscle cell: 75.5	Low cancer specificity	Detected in all			Region enhanced	Detected in all		cerebellum: 21.9	Not detected in immune cells	Not detected			Not detected	Not detected			Cancer enhanced	Detected in many		Brain cancer: 7.4	Breast - Smooth muscle cells, Colon - Smooth muscle cells, Prostate - Smooth muscle cells, Spleen - Fibroblast_1, Thyroid gland - Smooth muscle cells	Region enriched	Detected in many
MTHFR		ENSG00000177000	Methylenetetrahydrofolate reductase	P42898	1	11785723-11806455	Disease related genes, Enzymes, Human disease related genes, Metabolic proteins, Potential drug targets, Predicted intracellular proteins		Allosteric enzyme, Oxidoreductase	Disease variant, Schizophrenia	Evidence at protein level	Evidence at protein level	Evidence at protein level	Evidence at protein level	Low tissue specificity	Detected in all			Cell type enhanced	Detected in all		Skeletal myocytes: 86.8	Low cell type specificity	Detected in all			Low cancer specificity	Detected in all			Low region specificity	Detected in all			Low immune cell specificity	Detected in many			Low lineage specificity	Detected in all			Low cancer specificity	Detected in all				Low region specificity	Detected in all
MTR	cblG	ENSG00000116984	5-methyltetrahydrofolate-homocysteine methyltransferase	Q99707	1	236795260-236921278	Disease related genes, Enzymes, FDA approved drug targets, Human disease related genes, Metabolic proteins, Predicted intracellular proteins	Amino-acid biosynthesis, Methionine biosynthesis	Methyltransferase, Transferase	Disease variant, FDA approved drug targets	Evidence at protein level	Evidence at transcript level	Evidence at protein level	Evidence at protein level	Low tissue specificity	Detected in all			Cell type enhanced	Detected in many		Cardiomyocytes: 139.4;Glandular and luminal cells: 124.2	Low cell type specificity	Detected in all			Low cancer specificity	Detected in all			Low region specificity	Detected in all			Low immune cell specificity	Detected in many			Low lineage specificity	Detected in many			Low cancer specificity	Detected in all			Spleen - Endothelial cells	Low region specificity	Detected in all
MYO5A	GS1, MYH12, MYO5, MYR12	ENSG00000197535	Myosin VA	Q9Y4I1	15	52307281-52529132	Cancer-related genes, Disease related genes, Human disease related genes, Plasma proteins, Predicted intracellular proteins, Predicted membrane proteins	Protein transport, Transport	Actin-binding, Calmodulin-binding, Motor protein, Myosin	Cancer-related genes	Evidence at protein level	Evidence at protein level	Evidence at protein level	Evidence at protein level	Tissue enhanced	Detected in all		brain: 35.2;parathyroid gland: 37.7	Cell type enhanced	Detected in many		Excitatory neurons: 341.0;Inhibitory neurons: 231.0;Melanocytes: 144.3;Oligodendrocyte precursor cells: 310.4;Oligodendrocytes: 376.2	Low cell type specificity	Detected in all			Cancer enhanced	Detected in all		Skin Cuteneous Melanoma (TCGA): 46.7	Low region specificity	Detected in all			Low immune cell specificity	Detected in many			Low lineage specificity	Detected in all			Cancer enhanced	Detected in all		skin cancer: 61.5	Adipose subcutaneous - Macrophages, Minor Salivary Gland - Macrophages	Low region specificity	Detected in all
MYOF	FER1L3, KIAA1207	ENSG00000138119	Myoferlin	Q9NZM1	10	93306429-93482334	Disease related genes, Human disease related genes, Plasma proteins, Potential drug targets, Predicted intracellular proteins, Predicted membrane proteins, Transporters				Evidence at protein level	Evidence at protein level	Evidence at protein level	Evidence at protein level	Low tissue specificity	Detected in many			Cell type enhanced	Detected in many		Alveolar cells type 1: 147.4;Glandular and luminal cells: 129.4	Cell type enhanced	Detected in many		central nervous system macrophage: 264.4;choroid plexus epithelial cell: 346.6;endothelial cell: 251.4;pericyte: 248.4;vascular associated smooth muscle cell: 224.5	Low cancer specificity	Detected in all			Region enhanced	Detected in all		choroid plexus: 78.3	Immune cell enhanced	Detected in some		intermediate monocyte: 20.4;non-classical monocyte: 26.7	Group enriched	Detected in many	57	dendritic cells: 8.1;monocytes: 26.7	Low cancer specificity	Detected in many			Adipose visceral - Adipose progenitor cells, Adrenal gland - Adrenal cortex cells	Low region specificity	Detected in many
NAA11	ARD1B, ARD2, hARD2	ENSG00000156269	N-alpha-acetyltransferase 11, NatA catalytic subunit	Q9BSU3	4	79225694-79326061	Enzymes, Metabolic proteins, Predicted intracellular proteins		Acyltransferase, Transferase		Evidence at protein level	Evidence at protein level	Evidence at protein level	Evidence at protein level	Group enriched	Detected in some	11	placenta: 4.0;testis: 6.0	Group enriched	Detected in some	22	Cytotrophoblasts: 19.6;Early spermatids: 33.4;Extravillous trophoblasts: 18.2;Late spermatids: 24.8;Spermatocytes: 24.9;Spermatogonia: 14.7;Syncytiotrophoblasts: 15.3	Group enriched	Detected in many	7	astrocyte: 81.9;ependymal cell: 71.2;fibroblast: 42.7	Cancer enhanced	Detected in single		Testicular Germ Cell Tumor (TCGA): 3.0	Low region specificity	Detected in all			Not detected in immune cells	Not detected			Not detected	Not detected			Cancer enhanced	Detected in many		Myeloma: 7.0;thyroid cancer: 7.2	Testis - Early spermatids
NALCN	bA430M15.1, CanIon, VGCNL1	ENSG00000102452	Sodium leak channel, non-selective	Q8IZF0	13	101053776-101416508	Disease related genes, Human disease related genes, Potential drug targets, Predicted intracellular proteins, Predicted membrane proteins, Transporters	Ion transport, Sodium transport, Transport	Ion channel, Sodium channel, Voltage-gated channel	Disease variant, Neurodegeneration	Evidence at protein level	Evidence at transcript level	Evidence at protein level	Evidence at protein level	Tissue enhanced	Detected in many		brain: 15.6	Group enriched	Detected in many	8	Astrocytes: 118.9;Excitatory neurons: 256.8;Inhibitory neurons: 265.6;Oligodendrocyte precursor cells: 304.7;Oligodendrocytes: 444.3	Low cell type specificity	Detected in all			Low cancer specificity	Detected in many			Low region specificity	Detected in all			Immune cell enriched	Detected in single	5	basophil: 2.5	Lineage enriched	Detected in single	7	granulocytes: 2.5	Low cancer specificity	Detected in many			Adipose subcutaneous - Smooth muscle cells, Colon - Colon enteroendocrine cells, Liver - Hepatic stellate cells, Skin - Eccrine sweat gland cells, Spleen - Smooth muscle cells, Testis - Peritubular cells	Low region specificity	Detected in all
NBPF1	FLJ20719, KIAA1693	ENSG00000219481	NBPF member 1	Q3BBV0	1	16562319-16613562	Cancer-related genes, Predicted intracellular proteins			Cancer-related genes	Evidence at protein level	Evidence at protein level	Evidence at protein level	Evidence at protein level	Low tissue specificity	Detected in many			Cell type enhanced	Detected in many		Astrocytes: 70.0;Inhibitory neurons: 49.9;Oligodendrocyte precursor cells: 64.1;Oligodendrocytes: 81.9;Spermatocytes: 49.3	Low cell type specificity	Detected in all			Low cancer specificity	Detected in many			Low region specificity	Detected in all			Immune cell enhanced	Detected in single		eosinophil: 1.2	Low lineage specificity	Detected in single			Low cancer specificity	Detected in all			Testis - Spermatocytes
NBPF10	AG1	ENSG00000271425	NBPF member 10	Q6P3W6	1	146064711-146229000	Cancer-related genes, Predicted intracellular proteins			Cancer-related genes	Evidence at protein level	Evidence at protein level	No human protein/transcript evidence	Evidence at protein level	Low tissue specificity	Detected in many			Cell type enhanced	Detected in many		Early spermatids: 19.4;Paneth cells: 29.1;Squamous epithelial cells: 25.0	Cell type enhanced	Detected in many		bergmann glia: 22.8	Low cancer specificity	Detected in many			Low region specificity	Detected in all			Low immune cell specificity	Detected in many			Low lineage specificity	Detected in many			Low cancer specificity	Detected in all			Spleen - B-cells (Spleen)
NBPF11	NBPF24	ENSG00000263956	NBPF member 11	Q86T75	1	148102047-148152322	Predicted intracellular proteins				Evidence at protein level	Evidence at protein level	Evidence at transcript level	Evidence at transcript level	Low tissue specificity	Detected in all			Cell type enhanced	Detected in many		Excitatory neurons: 27.2;Oligodendrocyte precursor cells: 28.8;Oligodendrocytes: 27.9	Low cell type specificity	Detected in all			Low cancer specificity	Detected in all			Low region specificity	Detected in all			Low immune cell specificity	Detected in many			Low lineage specificity	Detected in many			Low cancer specificity	Detected in all
NBPF12	COAS1, KIAA1245	ENSG00000268043	NBPF member 12	Q5TAG4	1	146938324-146996202	Predicted intracellular proteins				Evidence at protein level	Evidence at protein level	Evidence at transcript level	Evidence at transcript level	Tissue enhanced	Detected in all		pancreas: 56.2	Low cell type specificity	Detected in many			Low cell type specificity	Detected in all			Low cancer specificity	Detected in all			Low region specificity	Detected in all			Low immune cell specificity	Detected in many			Low lineage specificity	Detected in many			Low cancer specificity	Detected in all
NBPF14	DJ328E19.C1.1	ENSG00000270629	NBPF member 14		1	148531385-148679742	Predicted intracellular proteins				Evidence at protein level	Evidence at protein level			Low tissue specificity	Detected in all			Cell type enhanced	Detected in many		Astrocytes: 90.1;Paneth cells: 114.1	Cell type enhanced	Detected in many		bergmann glia: 26.3	Low cancer specificity	Detected in all			Low region specificity	Detected in all			Low immune cell specificity	Detected in all			Low lineage specificity	Detected in all			Low cancer specificity	Detected in all			Spleen - B-cells (Spleen)
NBPF15	MGC8902, NBPF16	ENSG00000266338	NBPF member 15	Q8N660	1	144421390-144461676	Predicted intracellular proteins				Evidence at protein level	Evidence at protein level	Evidence at transcript level	Evidence at transcript level	Low tissue specificity	Detected in all			Cell type enhanced	Detected in many		B-cells: 14.5;Basal squamous epithelial cells: 14.6;Excitatory neurons: 16.3;Squamous epithelial cells: 14.6	Low cell type specificity	Detected in all			Low cancer specificity	Detected in all			Low region specificity	Detected in all			Low immune cell specificity	Detected in many			Group enriched	Detected in many	5	B-cells: 2.6;NK-cells: 2.3;T-cells: 3.9	Low cancer specificity	Detected in all
NBPF19		ENSG00000271383	NBPF member 19	A0A087WUL8	1	149475045-149556361	Predicted intracellular proteins				Evidence at protein level	Evidence at protein level			Low tissue specificity	Detected in all			Cell type enhanced	Detected in some		Astrocytes: 57.9;Excitatory neurons: 7.4;Microglial cells: 11.6;Oligodendrocyte precursor cells: 20.8	Cell type enhanced	Detected in many		astrocyte: 26.3;bergmann glia: 23.5;leukocyte: 21.8	Low cancer specificity	Detected in all			Low region specificity	Detected in all			Low immune cell specificity	Detected in all			Low lineage specificity	Detected in all			Low cancer specificity	Detected in all
NBPF20		ENSG00000162825	NBPF member 20		1	145289900-145425603	Predicted intracellular proteins				Evidence at protein level	Evidence at protein level			Low tissue specificity	Detected in some			Cell type enhanced	Detected in many		dendritic cells: 14.2;Early spermatids: 31.2	Low cell type specificity	Detected in many			Low cancer specificity	Detected in many			Low region specificity	Detected in all			Not detected in immune cells	Not detected			Not detected	Not detected			Low cancer specificity	Detected in all
NBPF26		ENSG00000273136	NBPF member 26		1	120723949-120842110	Predicted intracellular proteins				Evidence at protein level	Evidence at protein level			Low tissue specificity	Detected in all			Cell type enhanced	Detected in many		B-cells: 27.8;Basal squamous epithelial cells: 60.1;Erythroid cells: 44.5;Macrophages: 32.0;Paneth cells: 29.0;Squamous epithelial cells: 90.6	Cell type enhanced	Detected in many		astrocyte: 32.8;bergmann glia: 40.1	Low cancer specificity	Detected in many			Low region specificity	Detected in all			Low immune cell specificity	Detected in many			Group enriched	Detected in many	4	granulocytes: 7.3;monocytes: 5.7	Low cancer specificity	Detected in all
NBPF8	NBPF8P	ENSG00000270231	NBPF member 8		1	120415035-120469676	Predicted intracellular proteins				Evidence at protein level	Evidence at protein level			Low tissue specificity	Detected in many			Cell type enhanced	Detected in many		Basal squamous epithelial cells: 8.4;Macrophages: 8.1;Oligodendrocyte precursor cells: 12.3;Squamous epithelial cells: 13.4	Low cell type specificity	Detected in all							Low region specificity	Detected in all			Not detected in immune cells	Not detected			Not detected	Not detected			Low cancer specificity	Detected in all
NBPF9	AE01	ENSG00000269713	NBPF member 9	P0DPF3	1	149052186-149103561	Predicted intracellular proteins				Evidence at protein level	Evidence at protein level	Evidence at protein level	Evidence at protein level	Low tissue specificity	Detected in all			Cell type enhanced	Detected in many		monocytes: 30.8	Low cell type specificity	Detected in some			Low cancer specificity	Detected in all			Low region specificity	Detected in all			Low immune cell specificity	Detected in all			Low lineage specificity	Detected in all			Low cancer specificity	Detected in all
NCBP2	Cbc2, CBP20, NIP1	ENSG00000114503	Nuclear cap binding protein subunit 2	P52298	3	196935402-196942594	Predicted intracellular proteins, Transporters	mRNA processing, mRNA splicing, mRNA transport, Nonsense-mediated mRNA decay, RNA-mediated gene silencing, Translation regulation, Transport	RNA-binding		Evidence at protein level	Evidence at protein level	Evidence at protein level	Evidence at protein level	Low tissue specificity	Detected in all			Low cell type specificity	Detected in all			Low cell type specificity	Detected in all			Low cancer specificity	Detected in all			Low region specificity	Detected in all			Low immune cell specificity	Detected in all			Low lineage specificity	Detected in all			Low cancer specificity	Detected in all				Low region specificity	Detected in all
NECAB1	EFCBP1	ENSG00000123119	N-terminal EF-hand calcium binding protein 1	Q8N987	8	90791741-90959393	Predicted intracellular proteins, Transporters				Evidence at protein level	Evidence at protein level	Evidence at protein level	Evidence at protein level	Group enriched	Detected in many	4	brain: 54.7;choroid plexus: 16.4	Group enriched	Detected in many	5	Excitatory neurons: 362.6;Oligodendrocytes: 286.6	Low cell type specificity	Detected in all			Cancer enhanced	Detected in some		Glioblastoma Multiforme (TCGA): 4.5	Low region specificity	Detected in all			Not detected in immune cells	Not detected			Not detected	Not detected			Low cancer specificity	Detected in many			Lung - Alveolar cells type 2, Prostate - Smooth muscle cells	Low region specificity	Detected in all
NEFH	NF-H, NFH	ENSG00000100285	Neurofilament heavy chain	P12036	22	29480218-29491390	Disease related genes, Human disease related genes, Predicted intracellular proteins			Amyotrophic lateral sclerosis, Charcot-Marie-Tooth disease, Disease variant, Neurodegeneration, Neuropathy	Evidence at protein level	Evidence at protein level	Evidence at protein level	Evidence at protein level	Group enriched	Detected in many	4	brain: 95.6;prostate: 237.7	Cell type enriched	Detected in many	31	Prostatic glandular cells: 2083.6	Cell type enhanced	Detected in all		lower rhombic lip: 112.6;mammillary body: 92.3	Group enriched	Detected in many	6	Prostate Adenocarcinoma (TCGA): 172.7;Testicular Germ Cell Tumor (TCGA): 56.7	Low region specificity	Detected in all			Immune cell enhanced	Detected in some		non-classical monocyte: 4.7	Lineage enriched	Detected in single	5	monocytes: 4.7	Cancer enhanced	Detected in many		cervical cancer: 55.1;Neuroblastoma: 43.5	Adipose subcutaneous - Macrophages, Adipose visceral - Macrophages, Adrenal gland - Adrenal cortex cells, Colon - Colon enteroendocrine cells, Lung - Macrophages, Minor Salivary Gland - Macrophages, Prostate - Prostate glandular cells	Low region specificity	Detected in all
NEK1	KIAA1901, NY-REN-55	ENSG00000137601	NIMA related kinase 1	Q96PY6	4	169369704-169612632	Disease related genes, Enzymes, Human disease related genes, Potential drug targets, Predicted intracellular proteins	Cell cycle, Cell division, Cilium biogenesis/degradation, Mitosis	Kinase, Serine/threonine-protein kinase, Transferase, Tyrosine-protein kinase	Amyotrophic lateral sclerosis, Ciliopathy, Neurodegeneration	Evidence at protein level	Evidence at protein level	Evidence at protein level	Evidence at protein level	Low tissue specificity	Detected in all			Cell type enhanced	Detected in all		Astrocytes: 154.2;Excitatory neurons: 122.0;Inhibitory neurons: 163.5;Oligodendrocytes: 182.6	Low cell type specificity	Detected in all			Low cancer specificity	Detected in many			Low region specificity	Detected in all			Low immune cell specificity	Detected in many			Low lineage specificity	Detected in many			Low cancer specificity	Detected in all			Testis - Spermatocytes	Low region specificity	Detected in all
NEK2	NEK2A, NLK1, PPP1R111, RP67	ENSG00000117650	NIMA related kinase 2	P51955	1	211658657-211675630	Disease related genes, Enzymes, Human disease related genes, Potential drug targets, Predicted intracellular proteins	Cell cycle, Cell division, Chromosome partition, Meiosis, Mitosis	Kinase, Serine/threonine-protein kinase, Transferase	Retinitis pigmentosa	Evidence at protein level	Evidence at protein level	Evidence at protein level	Evidence at protein level	Group enriched	Detected in many	5	bone marrow: 17.5;lymphoid tissue: 18.7;testis: 65.2	Cell type enhanced	Detected in many		Early spermatids: 83.0;Erythroid cells: 42.1;Late spermatids: 38.7;Spermatocytes: 210.5	Cell type enhanced	Detected in some		ependymal cell: 2.5;hippocampal CA4: 2.6;upper-layer intratelencephalic: 1.9	Low cancer specificity	Detected in many			Low region specificity	Detected in all			Low immune cell specificity	Detected in some			Low lineage specificity	Detected in many			Low cancer specificity	Detected in all			Adrenal gland - Mitotic cells (Adrenal gland), Colon - Mitotic cells (Colon), Heart muscle - Mitotic cells (Heart), Lung - Mitotic cells (Lung), Minor Salivary Gland - Mitotic cells (Minor salivary gland), Skin - Mitotic cells (Skin), Spleen - Mitotic cells (Spleen), Stomach - Mitotic cells (Stomach), Testis - Early spermatids, Thyroid gland - Mitotic cells (Thyroid)	Region enhanced	Detected in many
NEK3	HSPK36, MGC29949	ENSG00000136098	NIMA related kinase 3	P51956	13	52132639-52159861	Enzymes, Predicted intracellular proteins	Cell cycle, Cell division, Mitosis	Kinase, Serine/threonine-protein kinase, Transferase		Evidence at protein level	Evidence at protein level	Evidence at protein level	Evidence at protein level	Low tissue specificity	Detected in all			Cell type enhanced	Detected in many		Oligodendrocytes: 81.0;Spermatocytes: 44.4	Cell type enhanced	Detected in all		endothelial cell: 123.8;oligodendrocyte: 159.6	Low cancer specificity	Detected in all			Low region specificity	Detected in all			Low immune cell specificity	Detected in many			Low lineage specificity	Detected in all			Low cancer specificity	Detected in all			Testis - Early spermatids	Low region specificity	Detected in all
NEK8	NPHP9	ENSG00000160602	NIMA related kinase 8	Q86SG6	17	28725897-28743455	Disease related genes, Enzymes, Human disease related genes, Potential drug targets, Predicted intracellular proteins		Kinase, Serine/threonine-protein kinase, Transferase	Ciliopathy, Disease variant, Nephronophthisis	Evidence at protein level	Evidence at protein level	Evidence at protein level	Evidence at protein level	Low tissue specificity	Detected in many			Cell type enhanced	Detected in many		dendritic cells: 48.0	Low cell type specificity	Detected in many			Low cancer specificity	Detected in all			Low region specificity	Detected in all			Immune cell enhanced	Detected in many		plasmacytoid DC: 14.8	Low lineage specificity	Detected in all			Low cancer specificity	Detected in all			Spleen - B-cells (Spleen)	Low region specificity	Detected in all
NFE2L2	NRF-2, NRF2	ENSG00000116044	NFE2 like bZIP transcription factor 2	Q16236	2	177218667-177392756	Cancer-related genes, Disease related genes, Human disease related genes, Predicted intracellular proteins, Transcription factors	Host-virus interaction, Transcription, Transcription regulation	Activator, DNA-binding	Cancer-related genes, Disease variant	Evidence at protein level	Evidence at protein level	Evidence at protein level	Evidence at protein level	Low tissue specificity	Detected in all			Cell type enhanced	Detected in all		Langerhans cells: 766.8;monocytes: 808.3	Low cell type specificity	Detected in all			Low cancer specificity	Detected in all			Low region specificity	Detected in all			Low immune cell specificity	Detected in all			Low lineage specificity	Detected in all			Low cancer specificity	Detected in all			Skin - Keratinocyte (other)	Low region specificity	Detected in all
NIN		ENSG00000100503	Ninein	Q8N4C6	14	50719763-50831162	Cancer-related genes, Disease related genes, Human disease related genes, Plasma proteins, Predicted intracellular proteins			Cancer-related genes, Disease variant, Dwarfism, Intellectual disability	Evidence at protein level	Evidence at protein level	Evidence at protein level	Evidence at protein level	Tissue enhanced	Detected in all		bone marrow: 40.7	Cell type enhanced	Detected in many		dendritic cells: 135.7;Excitatory neurons: 232.3;monocytes: 179.3	Low cell type specificity	Detected in all			Low cancer specificity	Detected in all			Low region specificity	Detected in all			Immune cell enhanced	Detected in all		basophil: 24.6	Low lineage specificity	Detected in all			Low cancer specificity	Detected in all				Low region specificity	Detected in all
NINL	KIAA0980, NLP	ENSG00000101004	Ninein like	Q9Y2I6	20	25451594-25585531	Predicted intracellular proteins				Evidence at protein level	Evidence at transcript level	Evidence at protein level	Evidence at protein level	Low tissue specificity	Detected in many			Cell type enhanced	Detected in many		Astrocytes: 40.3;Inhibitory neurons: 31.2;Oligodendrocyte precursor cells: 44.3	Low cell type specificity	Detected in all			Low cancer specificity	Detected in all			Low region specificity	Detected in all			Not detected in immune cells	Not detected			Not detected	Not detected			Low cancer specificity	Detected in many			Liver - Hepatocytes, Testis - Sertoli cells	Low region specificity	Detected in many
NME5	nm23-H5, RSPH23	ENSG00000112981	NME/NM23 family member 5	P56597	5	138115175-138139443	Human disease related genes, Predicted intracellular proteins	Differentiation, Spermatogenesis	Developmental protein, Hydrolase	Ciliopathy, Primary ciliary dyskinesia	Evidence at protein level	Evidence at protein level	Evidence at protein level	Evidence at protein level	Tissue enhanced	Detected in many		fallopian tube: 36.1;testis: 51.7	Group enriched	Detected in many	4	Ciliated cells: 242.4;Early spermatids: 844.1;Late spermatids: 297.8;Spermatocytes: 278.6	Cell type enhanced	Detected in all		ependymal cell: 357.4	Low cancer specificity	Detected in many			Low region specificity	Detected in all			Not detected in immune cells	Not detected			Not detected	Not detected			Cancer enhanced	Detected in some		prostate cancer: 3.8	Lung - Respiratory ciliated cells, Testis - Early spermatids, Thyroid gland - Thyroid glandular cells	Low region specificity	Detected in all
NPHP3	CFAP31, FLJ30691, FLJ36696, KIAA2000, MKS7, NPH3, SLSN3	ENSG00000113971	Nephrocystin 3	Q7Z494	3	132680609-132722432	Disease related genes, Human disease related genes, Predicted intracellular proteins	Wnt signaling pathway		Ciliopathy, Disease variant, Meckel syndrome, Nephronophthisis	Evidence at protein level	Evidence at transcript level	Evidence at protein level	Evidence at protein level	Low tissue specificity	Detected in all			Cell type enhanced	Detected in many		Leydig cells: 59.4	Low cell type specificity	Detected in all			Low cancer specificity	Detected in all			Low region specificity	Detected in all			Low immune cell specificity	Detected in single			Low lineage specificity	Detected in single			Low cancer specificity	Detected in all				Low region specificity	Detected in many
NR1H4	FXR, HRR-1, HRR1, RIP14	ENSG00000012504	Nuclear receptor subfamily 1 group H member 4	Q96RI1	12	100473708-100564414	Disease related genes, FDA approved drug targets, Human disease related genes, Nuclear receptors, Predicted intracellular proteins, Transcription factors, Transporters	Immunity, Inflammatory response, Innate immunity, Transcription, Transcription regulation	Activator, DNA-binding, Receptor, Repressor	Disease variant, FDA approved drug targets, Intrahepatic cholestasis	Evidence at protein level	Evidence at protein level	Evidence at protein level	Evidence at protein level	Tissue enhanced	Detected in many		intestine: 38.1;liver: 116.9	Cell type enhanced	Detected in some		Cholangiocytes: 89.7;Granulosa cells: 87.5;Hepatocytes: 109.1;Oocytes: 59.6;Proximal enterocytes: 336.8;Proximal tubular cells: 149.8	Group enriched	Detected in some	5	ependymal cell: 24.3;vascular associated smooth muscle cell: 13.6	Group enriched	Detected in many	10	Kidney Renal Clear Cell Carcinoma (TCGA): 31.0;Kidney Renal Papillary Cell Carcinoma (TCGA): 30.5;Liver Hepatocellular Carcinoma (TCGA): 34.0	Low region specificity	Detected in all			Not detected in immune cells	Not detected			Not detected	Not detected			Group enriched	Detected in some	4	Gastric cancer: 3.8;Kidney cancer: 14.8;liver cancer: 12.1	Adrenal gland - Adrenal cortex cells	Not detected	Not detected
NRCAM	Bravo, KIAA0343	ENSG00000091129	Neuronal cell adhesion molecule	Q92823	7	108147623-108456717	Disease related genes, Plasma proteins, Predicted membrane proteins, Predicted secreted proteins	Cell adhesion		Disease variant, Intellectual disability	Evidence at protein level	Evidence at transcript level	Evidence at protein level	Evidence at protein level	Tissue enhanced	Detected in many		brain: 105.3	Group enriched	Detected in many	9	Astrocytes: 580.9;Excitatory neurons: 738.4;Inhibitory neurons: 375.6;Oligodendrocyte precursor cells: 1181.5	Low cell type specificity	Detected in all			Cancer enriched	Detected in many	6	Glioblastoma Multiforme (TCGA): 65.2	Low region specificity	Detected in all			Immune cell enriched	Detected in single	6	naive CD8 T-cell: 2.1	Lineage enriched	Detected in single	15	T-cells: 2.1	Low cancer specificity	Detected in many			Adipose subcutaneous - Adipocytes (Subcutaneous), Pituitary gland - Lactotropes, Spleen - Fibroblast_2	Low region specificity	Detected in all
NUDCD3	KIAA1068, NudCL	ENSG00000015676	NudC domain containing 3	Q8IVD9	7	44379119-44490658	Predicted intracellular proteins				Evidence at protein level	Evidence at protein level	Evidence at protein level	Evidence at protein level	Low tissue specificity	Detected in all			Low cell type specificity	Detected in all			Low cell type specificity	Detected in all			Low cancer specificity	Detected in many			Low region specificity	Detected in all			Low immune cell specificity	Detected in many			Low lineage specificity	Detected in many			Low cancer specificity	Detected in all				Low region specificity	Detected in all
NUP85	FLJ12549, NUP75	ENSG00000125450	Nucleoporin 85	Q9BW27	17	75205659-75235758	Disease related genes, Human disease related genes, Metabolic proteins, Potential drug targets, Predicted intracellular proteins, Transporters	mRNA transport, Protein transport, Translocation, Transport		Disease variant	Evidence at protein level	Evidence at protein level	Evidence at protein level	Evidence at protein level	Low tissue specificity	Detected in all			Cell type enhanced	Detected in all		Oocytes: 86.0	Low cell type specificity	Detected in all			Low cancer specificity	Detected in all			Low region specificity	Detected in all			Low immune cell specificity	Detected in all			Low lineage specificity	Detected in all			Low cancer specificity	Detected in all				Low region specificity	Detected in all
NYAP2	KIAA1486	ENSG00000144460	Neuronal tyrosine-phosphorylated phosphoinositide-3-kinase adaptor 2	Q9P242	2	225399710-225729887	Predicted intracellular proteins				Evidence at protein level	Evidence at transcript level	Evidence at protein level	Evidence at protein level	Group enriched	Detected in some	4	brain: 2.7;retina: 3.8	Group enriched	Detected in some	9	Excitatory neurons: 132.1;Inhibitory neurons: 227.0	Cell type enhanced	Detected in many		midbrain-derived inhibitory: 1450.1	Not detected	Not detected			Low region specificity	Detected in all			Not detected in immune cells	Not detected			Not detected	Not detected			Low cancer specificity	Detected in some				Low region specificity	Detected in all
OCRL	Dent-2, OCRL1	ENSG00000122126	OCRL inositol polyphosphate-5-phosphatase	Q01968	X	129539849-129592561	Disease related genes, Enzymes, Human disease related genes, Metabolic proteins, Potential drug targets, Predicted intracellular proteins	Cilium biogenesis/degradation, Lipid metabolism	Hydrolase	Cataract, Ciliopathy, Disease variant	Evidence at protein level	Evidence at protein level	Evidence at protein level	Evidence at protein level	Low tissue specificity	Detected in all			Cell type enhanced	Detected in many		Early spermatids: 37.9	Low cell type specificity	Detected in all			Low cancer specificity	Detected in all			Low region specificity	Detected in all			Group enriched	Detected in some	4	classical monocyte: 1.0;intermediate monocyte: 1.1;myeloid DC: 1.2;non-classical monocyte: 3.7	Group enriched	Detected in many	8	dendritic cells: 1.2;monocytes: 3.7	Low cancer specificity	Detected in all			Adrenal gland - Adrenal cortex cells	Low region specificity	Detected in all
ODAD4	DKFZP434H0115, TTC25	ENSG00000204815	Outer dynein arm docking complex subunit 4	Q96NG3	17	41930617-41966503	Disease related genes, Human disease related genes, Predicted intracellular proteins			Ciliopathy, Kartagener syndrome, Primary ciliary dyskinesia	Evidence at protein level	Evidence at protein level	Evidence at protein level	Evidence at protein level	Group enriched	Detected in many	4	choroid plexus: 11.8;fallopian tube: 16.4;testis: 43.6	Cell type enhanced	Detected in many		Ciliated cells: 105.5;Early spermatids: 261.4;Late spermatids: 63.6;Spermatocytes: 82.7	Group enriched	Detected in all	4	choroid plexus epithelial cell: 66.8;ependymal cell: 112.3	Low cancer specificity	Detected in many			Low region specificity	Detected in all			Not detected in immune cells	Not detected			Not detected	Not detected			Low cancer specificity	Detected in some			Lung - Respiratory ciliated cells, Minor Salivary Gland - Endothelial cells, Testis - Early spermatids	Low region specificity	Detected in many
ODF2	CT134, ODF84	ENSG00000136811	Outer dense fiber of sperm tails 2	Q5BJF6	9	128455186-128501292	Predicted intracellular proteins	Differentiation, Spermatogenesis	Developmental protein		Evidence at protein level	Evidence at protein level	Evidence at protein level	Evidence at protein level	Tissue enriched	Detected in all	8	testis: 308.7	Cell type enriched	Detected in many	6	Late spermatids: 8192.9	Low cell type specificity	Detected in all			Low cancer specificity	Detected in all			Low region specificity	Detected in all			Low immune cell specificity	Detected in all			Low lineage specificity	Detected in all			Low cancer specificity	Detected in all			Pituitary gland - Somatotropes, Testis - Early spermatids, Testis - Late spermatids	Low region specificity	Detected in all
OFD1	71-7A, CXorf5, JBTS10, RP23	ENSG00000046651	OFD1 centriole and centriolar satellite protein	O75665	X	13734743-13777955	Disease related genes, Human disease related genes, Plasma proteins, Predicted intracellular proteins	Cilium biogenesis/degradation		Ciliopathy, Disease variant, Joubert syndrome, Retinitis pigmentosa	Evidence at protein level	Evidence at transcript level	Evidence at protein level	Evidence at protein level	Low tissue specificity	Detected in all			Cell type enhanced	Detected in all		dendritic cells: 266.5;Oocytes: 288.9	Low cell type specificity	Detected in all			Low cancer specificity	Detected in all			Low region specificity	Detected in many			Immune cell enriched	Detected in all	6	plasmacytoid DC: 69.8	Lineage enriched	Detected in all	6	dendritic cells: 69.8	Low cancer specificity	Detected in all			Spleen - B-cells (Spleen)	Low region specificity	Detected in all
OPRL1	KOR-3, NOCIR, NOPr, OOR, ORL1, PNOCR	ENSG00000125510	Opioid related nociceptin receptor 1	P41146	20	64080082-64100643	G-protein coupled receptors, Predicted membrane proteins	Behavior	G-protein coupled receptor, Receptor, Transducer		Evidence at protein level	Evidence at transcript level	Evidence at protein level	Evidence at protein level	Group enriched	Detected in some	5	brain: 12.8;lymphoid tissue: 4.4;testis: 6.5	Cell type enhanced	Detected in some		Early spermatids: 12.2;Excitatory neurons: 6.0;Late spermatids: 31.6	Low cell type specificity	Detected in many			Cancer enhanced	Detected in some		Glioblastoma Multiforme (TCGA): 2.5	Low region specificity	Detected in all			Group enriched	Detected in many	9	classical monocyte: 3.9;eosinophil: 5.8;intermediate monocyte: 5.5;myeloid DC: 4.7;neutrophil: 4.9;non-classical monocyte: 12.5	Group enriched	Detected in many	11	dendritic cells: 4.7;granulocytes: 5.8;monocytes: 12.5	Low cancer specificity	Detected in many			Testis - Early spermatids, Testis - Late spermatids	Low region specificity	Detected in all
OSCP1	C1orf102, NOR1	ENSG00000116885	Organic solute carrier partner 1	Q8WVF1	1	36415827-36450451	Predicted intracellular proteins, Transporters	Transport			Evidence at protein level	Evidence at transcript level	Evidence at protein level	Evidence at protein level	Tissue enhanced	Detected in all		choroid plexus: 81.5;testis: 74.0	Cell type enriched	Detected in many	4	Early spermatids: 576.3	Cell type enhanced	Detected in all		ependymal cell: 94.6	Low cancer specificity	Detected in all			Low region specificity	Detected in all			Low immune cell specificity	Detected in some			Low lineage specificity	Detected in many			Low cancer specificity	Detected in all			Lung - Respiratory ciliated cells, Minor Salivary Gland - Minor salivary glandular cells, Testis - Early spermatids, Thyroid gland - Thyroid glandular cells	Low region specificity	Detected in all
PACSIN2	SDPII	ENSG00000100266	Protein kinase C and casein kinase substrate in neurons 2	Q9UNF0	22	42835412-43015149	Predicted intracellular proteins	Endocytosis			Evidence at protein level	Evidence at protein level	Evidence at protein level	Evidence at protein level	Low tissue specificity	Detected in all			Low cell type specificity	Detected in all			Low cell type specificity	Detected in all			Low cancer specificity	Detected in all			Low region specificity	Detected in all			Immune cell enhanced	Detected in all		neutrophil: 96.2	Low lineage specificity	Detected in all			Low cancer specificity	Detected in all			Testis - Spermatogonia	Low region specificity	Detected in all
PAWR	par-4, PAR4	ENSG00000177425	Pro-apoptotic WT1 regulator	Q96IZ0	12	79574979-79690964	Predicted intracellular proteins	Apoptosis, Transcription, Transcription regulation			Evidence at protein level	Evidence at protein level	Evidence at protein level	Evidence at protein level	Low tissue specificity	Detected in many			Low cell type specificity	Detected in many			Cell type enhanced	Detected in many		pericyte: 263.1;vascular associated smooth muscle cell: 264.8	Low cancer specificity	Detected in all			Low region specificity	Detected in all			Group enriched	Detected in some	5	memory B-cell: 2.7;naive B-cell: 2.8;NK-cell: 1.4	Group enriched	Detected in many	5	B-cells: 2.8;NK-cells: 1.4	Low cancer specificity	Detected in all			Minor Salivary Gland - Minor salivary glandular cells	Low region specificity	Detected in all
PCDHB15	PCDH-BETA15	ENSG00000113248	Protocadherin beta 15	Q9Y5E8	5	141245395-141249365	Predicted intracellular proteins, Predicted membrane proteins	Cell adhesion			Evidence at protein level	Evidence at transcript level	Evidence at transcript level	Evidence at protein level	Low tissue specificity	Detected in many			Cell type enhanced	Detected in some		Adipocytes: 4.0;Bipolar cells: 4.3;Early spermatids: 8.0;Endometrial stromal cells: 3.9;Fibroblasts: 4.3;Horizontal cells: 3.8;Ovarian stromal cells: 3.5;Smooth muscle cells: 3.5;Spermatocytes: 3.8	Low cell type specificity	Detected in many			Low cancer specificity	Detected in many			Low region specificity	Detected in all			Not detected in immune cells	Not detected			Not detected	Not detected			Cancer enhanced	Detected in many		Gallbladder cancer: 4.5	Testis - Sertoli cells	Low region specificity	Detected in all
PCM1	PTC4	ENSG00000078674	Pericentriolar material 1	Q15154	8	17922842-18029948	Cancer-related genes, Disease related genes, Predicted intracellular proteins	Cilium biogenesis/degradation		Cancer-related genes, Proto-oncogene	Evidence at protein level	Evidence at protein level	Evidence at protein level	Evidence at protein level	Low tissue specificity	Detected in all			Cell type enhanced	Detected in all		Early spermatids: 613.4;Spermatocytes: 523.9	Low cell type specificity	Detected in all			Low cancer specificity	Detected in all			Low region specificity	Detected in all			Low immune cell specificity	Detected in all			Low lineage specificity	Detected in all			Low cancer specificity	Detected in all			Testis - Early spermatids	Low region specificity	Detected in all
PDE11A		ENSG00000128655	Phosphodiesterase 11A	Q9HCR9	2	177623244-178108339	Disease related genes, Enzymes, Human disease related genes, Metabolic proteins, Predicted intracellular proteins		Allosteric enzyme, Hydrolase	Cushing syndrome	Evidence at protein level	Evidence at protein level	Evidence at protein level	Evidence at protein level	Tissue enhanced	Detected in many		liver: 6.1;parathyroid gland: 9.9	Cell type enriched	Detected in many	7	Prostatic glandular cells: 139.2	Cell type enhanced	Detected in some		oligodendrocyte: 5.3;splatter: 4.5	Low cancer specificity	Detected in some			Low region specificity	Detected in all			Not detected in immune cells	Not detected			Not detected	Not detected			Group enriched	Detected in some	6	Kidney cancer: 6.5;Rhabdoid: 7.5	Minor Salivary Gland - Minor salivary glandular cells, Pituitary gland - Lactotropes, Prostate - Prostate glandular cells, Skin - Eccrine sweat gland cells, Testis - Early spermatids, Testis - Late spermatids	Low region specificity	Detected in many
PDE4B	DPDE4	ENSG00000184588	Phosphodiesterase 4B	Q07343	1	65792514-66374579	Enzymes, FDA approved drug targets, Metabolic proteins, Plasma proteins, Predicted intracellular proteins		Hydrolase	FDA approved drug targets	Evidence at protein level	Evidence at protein level	Evidence at protein level	Evidence at protein level	Tissue enhanced	Detected in all		bone marrow: 74.6	Group enriched	Detected in many	5	Oligodendrocyte precursor cells: 1616.4;Oligodendrocytes: 3759.6	Cell type enhanced	Detected in all		oligodendrocyte: 5976.5	Cancer enhanced	Detected in all		Glioblastoma Multiforme (TCGA): 52.7	Low region specificity	Detected in all			Immune cell enhanced	Detected in all		neutrophil: 89.5	Group enriched	Detected in all	5	B-cells: 37.6;granulocytes: 89.5;T-cells: 34.8	Cancer enhanced	Detected in many		Rhabdoid: 47.5	Colon - Endothelial cells	Low region specificity	Detected in all
PDE4C	DPDE1	ENSG00000105650	Phosphodiesterase 4C	Q08493	19	18207965-18248200	Enzymes, FDA approved drug targets, Metabolic proteins, Predicted intracellular proteins		Hydrolase	FDA approved drug targets	Evidence at protein level	Evidence at transcript level	Evidence at protein level	Evidence at protein level	Tissue enhanced	Detected in many		tongue: 23.7	Cell type enhanced	Detected in some		Astrocytes: 1.9;Excitatory neurons: 8.0;Gastric mucus-secreting cells: 2.9;Inhibitory neurons: 2.0;Smooth muscle cells: 1.7	Group enriched	Detected in many	5	pericyte: 107.6;vascular associated smooth muscle cell: 88.8	Low cancer specificity	Detected in some			Low region specificity	Detected in all			Not detected in immune cells	Not detected			Not detected	Not detected			Cancer enhanced	Detected in some		Rhabdoid: 2.4		Not detected	Not detected
PDE4D	DPDE3	ENSG00000113448	Phosphodiesterase 4D	Q08499	5	58969038-60522120	Disease related genes, Enzymes, FDA approved drug targets, Human disease related genes, Metabolic proteins, Predicted intracellular proteins		Hydrolase	Disease variant, FDA approved drug targets	Evidence at protein level	Evidence at transcript level	Evidence at protein level	Evidence at protein level	Tissue enhanced	Detected in many		bone marrow: 74.0	Cell type enhanced	Detected in many		Astrocytes: 587.4;Excitatory neurons: 2871.5;Inhibitory neurons: 1067.5;Oligodendrocyte precursor cells: 795.7;Oligodendrocytes: 412.4	Low cell type specificity	Detected in all			Low cancer specificity	Detected in many			Low region specificity	Detected in all			Immune cell enriched	Detected in many	5	eosinophil: 58.2	Lineage enriched	Detected in many	5	granulocytes: 58.2	Low cancer specificity	Detected in all			Testis - Spermatogonia	Low region specificity	Detected in all
PDE5A		ENSG00000138735	Phosphodiesterase 5A	O76074	4	119494397-119628804	Enzymes, FDA approved drug targets, Metabolic proteins, Predicted intracellular proteins		Allosteric enzyme, Hydrolase	FDA approved drug targets	Evidence at protein level	Evidence at protein level	Evidence at protein level	Evidence at protein level	Low tissue specificity	Detected in all			Cell type enhanced	Detected in many		Excitatory neurons: 63.9;Inhibitory neurons: 55.8;Oligodendrocyte precursor cells: 53.3;Peritubular cells: 96.4;Smooth muscle cells: 81.6	Low cell type specificity	Detected in all			Cancer enhanced	Detected in many		Thyroid Carcinoma (TCGA): 50.4	Low region specificity	Detected in all			Not detected in immune cells	Not detected			Not detected	Not detected			Low cancer specificity	Detected in all			Heart muscle - Fibroblasts, Kidney - Fibroblasts, Liver - Hepatic stellate cells, Testis - Peritubular cells, Thyroid gland - Fibroblasts	Region enhanced	Detected in all
PDE6B	CSNB3, CSNBAD2, PDEB, rd1, RP40	ENSG00000133256	Phosphodiesterase 6B	P35913	4	625573-670782	Disease related genes, Enzymes, Human disease related genes, Metabolic proteins, Predicted intracellular proteins	Sensory transduction, Vision	Hydrolase	Congenital stationary night blindness, Disease variant, Retinitis pigmentosa	Evidence at protein level	Evidence at protein level	Evidence at protein level	Evidence at protein level	Tissue enriched	Detected in many	14	retina: 373.2	Cell type enriched	Detected in many	5	Rod photoreceptor cells: 434.2	Cell type enhanced	Detected in many		oligodendrocyte: 86.7	Low cancer specificity	Detected in many			Low region specificity	Detected in all			Low immune cell specificity	Detected in many			Low lineage specificity	Detected in all			Low cancer specificity	Detected in many			Adipose subcutaneous - Macrophages, Thyroid gland - Thyroid glandular cells	Not detected	Not detected
PDGFRA	CD140a, GAS9, PDGFR2	ENSG00000134853	Platelet derived growth factor receptor alpha	P16234	4	54229280-54298245	Cancer-related genes, CD markers, Disease related genes, Enzymes, FDA approved drug targets, Human disease related genes, Plasma proteins, Predicted intracellular proteins, Predicted membrane proteins, RAS pathway related proteins	Chemotaxis, Host-virus interaction	Developmental protein, Kinase, Receptor, Transferase, Tyrosine-protein kinase	Cancer-related genes, Disease variant, FDA approved drug targets, Proto-oncogene	Evidence at protein level	Evidence at protein level	Evidence at protein level	Evidence at protein level	Tissue enhanced	Detected in all		ovary: 193.9	Group enriched	Detected in many	9	Endometrial stromal cells: 368.4;Fibroblasts: 258.5;Leydig cells: 422.2;Oligodendrocyte precursor cells: 468.8;Ovarian stromal cells: 204.8;Peritubular cells: 377.5	Group enriched	Detected in some	13	fibroblast: 133.8;oligodendrocyte precursor cell: 320.9	Cancer enhanced	Detected in all		Glioblastoma Multiforme (TCGA): 78.0	Low region specificity	Detected in all			Not detected in immune cells	Not detected			Not detected	Not detected			Cancer enhanced	Detected in many		Rhabdoid: 78.7;thyroid cancer: 38.5	Adrenal gland - Fibroblasts, Breast - Fibroblasts, Heart muscle - Fibroblasts, Kidney - Fibroblasts, Minor Salivary Gland - Macrophages, Pituitary gland - Fibroblasts, Prostate - Fibroblasts, Spleen - Fibroblast_2	Low region specificity	Detected in all
PDIA6	ERp5, P5, TXNDC7	ENSG00000143870	Protein disulfide isomerase family A member 6	Q15084	2	10783391-10837977	Enzymes, Metabolic proteins, Plasma proteins, Predicted intracellular proteins, Predicted membrane proteins		Chaperone, Isomerase		Evidence at protein level	Evidence at protein level	Evidence at protein level	Evidence at protein level	Low tissue specificity	Detected in all			Cell type enhanced	Detected in all		Extravillous trophoblasts: 1335.8;Plasma cells: 981.5	Low cell type specificity	Detected in all			Low cancer specificity	Detected in all			Low region specificity	Detected in all			Low immune cell specificity	Detected in all			Low lineage specificity	Detected in all			Low cancer specificity	Detected in all			Colon - Macrophages, Heart muscle - Macrophages	Low region specificity	Detected in all
PDPK1	PDK1	ENSG00000140992	3-phosphoinositide dependent protein kinase 1	O15530	16	2537979-2603188	Enzymes, Plasma proteins, Predicted intracellular proteins	Transcription, Transcription regulation	Activator, Kinase, Serine/threonine-protein kinase, Transferase		Evidence at protein level	Evidence at protein level	Evidence at protein level	Evidence at protein level	Low tissue specificity	Detected in all			Cell type enhanced	Detected in all		Oocytes: 351.4	Low cell type specificity	Detected in all			Low cancer specificity	Detected in all			Low region specificity	Detected in all			Low immune cell specificity	Detected in all			Low lineage specificity	Detected in all			Low cancer specificity	Detected in all			Testis - Spermatocytes	Low region specificity	Detected in all
PDZD7	bA108L7.8, DFNB57, FLJ23209, PDZK7	ENSG00000186862	PDZ domain containing 7	Q9H5P4	10	101007679-101032295	Disease related genes, Human disease related genes, Predicted intracellular proteins			Deafness, Disease variant, Non-syndromic deafness, Retinitis pigmentosa, Usher syndrome	Evidence at protein level	Evidence at transcript level	Evidence at protein level	Evidence at protein level	Group enriched	Detected in many	6	brain: 17.3;intestine: 19.4;pituitary gland: 5.8	Cell type enhanced	Detected in many		Bipolar cells: 12.4;Excitatory neurons: 31.2;Horizontal cells: 25.2;Inhibitory neurons: 15.8;Proximal enterocytes: 60.5	Low cell type specificity	Detected in all			Low cancer specificity	Detected in many			Low region specificity	Detected in all			Low immune cell specificity	Detected in single			Low lineage specificity	Detected in single			Low cancer specificity	Detected in many				Not detected	Not detected
PELI1		ENSG00000197329	Pellino E3 ubiquitin protein ligase 1	Q96FA3	2	64092652-64144420	Enzymes, Predicted intracellular proteins	DNA damage, DNA repair, Ubl conjugation pathway	Transferase		Evidence at protein level	Evidence at protein level	Evidence at protein level	Evidence at protein level	Tissue enriched	Detected in all	5	bone marrow: 226.2	Cell type enhanced	Detected in many		monocytes: 520.8;Plasma cells: 264.9;Squamous epithelial cells: 210.8	Cell type enhanced	Detected in all		central nervous system macrophage: 534.7;endothelial cell: 794.3	Low cancer specificity	Detected in all			Low region specificity	Detected in all			Immune cell enhanced	Detected in many		neutrophil: 77.1	Group enriched	Detected in all	4	granulocytes: 77.1;monocytes: 23.3	Cancer enhanced	Detected in all		lymphoma: 51.0	Heart muscle - Endothelial cells, Kidney - Endothelial cells, Skeletal muscle - Endothelial cells	Low region specificity	Detected in all
PELI2		ENSG00000139946	Pellino E3 ubiquitin protein ligase family member 2	Q9HAT8	14	56117814-56301524	Enzymes, Plasma proteins, Predicted intracellular proteins	Ubl conjugation pathway	Transferase		Evidence at protein level	Evidence at protein level	Evidence at protein level	Evidence at protein level	Low tissue specificity	Detected in all			Cell type enhanced	Detected in many		Astrocytes: 108.4;Microglial cells: 95.7;Oligodendrocyte precursor cells: 141.5;Oligodendrocytes: 72.2	Low cell type specificity	Detected in all			Low cancer specificity	Detected in many			Low region specificity	Detected in all			Immune cell enhanced	Detected in some		neutrophil: 5.6	Low lineage specificity	Detected in many			Low cancer specificity	Detected in many			Testis - Spermatogonia	Low region specificity	Detected in all
PHLPP2	KIAA0931, PHLPPL, PPM3B	ENSG00000040199	PH domain and leucine rich repeat protein phosphatase 2	Q6ZVD8	16	71637835-71724701	Enzymes, Predicted intracellular proteins		Hydrolase, Protein phosphatase	Tumor suppressor	Evidence at protein level	Evidence at protein level	Evidence at protein level	Evidence at protein level	Tissue enhanced	Detected in all		intestine: 21.3;retina: 31.1	Cell type enhanced	Detected in many		Cone photoreceptor cells: 54.4;Distal enterocytes: 52.3;Excitatory neurons: 67.2;Proximal enterocytes: 63.3;Rod photoreceptor cells: 77.3	Low cell type specificity	Detected in all			Low cancer specificity	Detected in many			Low region specificity	Detected in all			Not detected in immune cells	Not detected			Not detected	Not detected			Low cancer specificity	Detected in all			Testis - Spermatocytes	Low region specificity	Detected in all
PIBF1	C13orf24, CEP90, PIBF	ENSG00000083535	Progesterone immunomodulatory binding factor 1	Q8WXW3	13	72782133-73016461	Disease related genes, Human disease related genes, Plasma proteins, Predicted intracellular proteins, Predicted secreted proteins	Immunity		Ciliopathy, Disease variant, Joubert syndrome	Evidence at protein level	Evidence at protein level	Evidence at protein level	Evidence at protein level	Low tissue specificity	Detected in all			Cell type enhanced	Detected in all		Early spermatids: 359.5;Oligodendrocyte precursor cells: 134.9;Oligodendrocytes: 129.0	Low cell type specificity	Detected in all			Low cancer specificity	Detected in all			Low region specificity	Detected in all			Low immune cell specificity	Detected in all			Low lineage specificity	Detected in all			Low cancer specificity	Detected in all			Testis - Early spermatids, Testis - Spermatocytes	Low region specificity	Detected in all
PIK3CA	PI3K	ENSG00000121879	Phosphatidylinositol-4,5-bisphosphate 3-kinase catalytic subunit alpha	P42336	3	179148114-179240093	Cancer-related genes, Disease related genes, Enzymes, FDA approved drug targets, Human disease related genes, Metabolic proteins, Predicted intracellular proteins, RAS pathway related proteins	Angiogenesis, Lipid metabolism, Phagocytosis	Kinase, Serine/threonine-protein kinase, Transferase	Cancer-related genes, Disease variant, FDA approved drug targets, Proto-oncogene	Evidence at protein level	Evidence at protein level	Evidence at protein level	Evidence at protein level	Low tissue specificity	Detected in all			Cell type enhanced	Detected in all		Excitatory neurons: 122.4;Inhibitory neurons: 117.0;Oligodendrocyte precursor cells: 122.2	Low cell type specificity	Detected in all			Low cancer specificity	Detected in all			Low region specificity	Detected in all			Low immune cell specificity	Detected in many			Low lineage specificity	Detected in many			Low cancer specificity	Detected in all			Adrenal gland - Adrenal cortex cells	Low region specificity	Detected in all
PIK3CD	p110D	ENSG00000171608	Phosphatidylinositol-4,5-bisphosphate 3-kinase catalytic subunit delta	O00329	1	9629889-9729114	Disease related genes, Enzymes, FDA approved drug targets, Human disease related genes, Metabolic proteins, Predicted intracellular proteins, RAS pathway related proteins	Adaptive immunity, Chemotaxis, Differentiation, Immunity, Inflammatory response, Innate immunity, Lipid metabolism	Kinase, Transferase	Disease variant, FDA approved drug targets	Evidence at protein level	Evidence at protein level	Evidence at protein level	Evidence at protein level	Group enriched	Detected in many	5	bone marrow: 46.2;intestine: 11.7;lymphoid tissue: 44.1	Cell type enhanced	Detected in many		B-cells: 23.9;dendritic cells: 34.2;Kupffer cells: 26.0;Macrophages: 22.9;Microglial cells: 27.7;NK-cells: 28.4;T-cells: 35.2	Group enriched	Detected in all	5	central nervous system macrophage: 185.3;leukocyte: 245.1;pericyte: 237.2	Low cancer specificity	Detected in all			Low region specificity	Detected in all			Low immune cell specificity	Detected in all			Low lineage specificity	Detected in all			Cancer enhanced	Detected in all		Leukemia: 57.4;lymphoma: 54.3	Adrenal gland - Macrophages, Prostate - T-cells, Testis - Spermatogonia, Thyroid gland - T-cells	Low region specificity	Detected in all
PIK3R4	p150, VPS15	ENSG00000196455	Phosphoinositide-3-kinase regulatory subunit 4	Q99570	3	130678934-130746829	Enzymes, Predicted intracellular proteins		Kinase, Serine/threonine-protein kinase, Transferase		Evidence at protein level	Evidence at protein level	Evidence at protein level	Evidence at protein level	Low tissue specificity	Detected in all			Low cell type specificity	Detected in many			Low cell type specificity	Detected in all			Low cancer specificity	Detected in all			Low region specificity	Detected in all			Low immune cell specificity	Detected in all			Low lineage specificity	Detected in all			Low cancer specificity	Detected in all			Adrenal gland - Adrenal cortex cells, Testis - Spermatocytes, Testis - Spermatogonia	Low region specificity	Detected in all
PINLYP		ENSG00000234465	Phospholipase A2 inhibitor and LY6/PLAUR domain containing	A6NC86	19	43575801-43583964	Predicted intracellular proteins, Predicted secreted proteins				Evidence at protein level	Evidence at transcript level	Evidence at transcript level	Evidence at protein level	Low tissue specificity	Detected in many			Cell type enhanced	Detected in many		Distal tubular cells: 33.8;Proximal tubular cells: 19.0	Low cell type specificity	Detected in all			Low cancer specificity	Detected in all			Low region specificity	Detected in all			Immune cell enhanced	Detected in many		plasmacytoid DC: 21.1	Low lineage specificity	Detected in all			Cancer enhanced	Detected in many		Leukemia: 20.8	Heart muscle - Fibroblasts, Spleen - Fibroblast_1	Not detected	Not detected
PJA2	KIAA0438, Neurodap1, PRAJA2, RNF131	ENSG00000198961	Praja ring finger ubiquitin ligase 2	O43164	5	109334713-109409974	Enzymes, Metabolic proteins, Predicted intracellular proteins	Ubl conjugation pathway	Transferase		Evidence at protein level	Evidence at protein level	Evidence at protein level	Evidence at protein level	Low tissue specificity	Detected in all			Low cell type specificity	Detected in all			Low cell type specificity	Detected in all			Low cancer specificity	Detected in all			Low region specificity	Detected in all			Low immune cell specificity	Detected in all			Low lineage specificity	Detected in all			Low cancer specificity	Detected in all			Thyroid gland - Thyroid glandular cells	Low region specificity	Detected in all
PKHD1	ARPKD, FCYT, FPC, TIGM1	ENSG00000170927	PKHD1 ciliary IPT domain containing fibrocystin/polyductin	P08F94	6	51615299-52087613	Disease related genes, Human disease related genes, Plasma proteins, Predicted intracellular proteins, Predicted membrane proteins		Receptor	Ciliopathy, Disease variant	Evidence at protein level	Evidence at protein level	Evidence at protein level	Evidence at protein level	Group enriched	Detected in some	6	epididymis: 4.6;kidney: 13.2;pancreas: 9.1	Group enriched	Detected in some	5	Early spermatids: 370.0;Late spermatids: 97.9	Cell type enhanced	Detected in many		thalamic excitatory: 8.7	Group enriched	Detected in some	5	Kidney Renal Clear Cell Carcinoma (TCGA): 4.8;Kidney Renal Papillary Cell Carcinoma (TCGA): 10.3	Not detected	Not detected			Not detected in immune cells	Not detected			Not detected	Not detected			Cancer enhanced	Detected in some		Bile duct cancer: 2.1;Kidney cancer: 2.0	Adrenal gland - Adrenal medulla cells, Liver - Hepatocytes, Testis - Early spermatids, Testis - Late spermatids	Not detected	Not detected
PLCB2	FLJ38135	ENSG00000137841	Phospholipase C beta 2	Q00722	15	40278176-40307935	Enzymes, Metabolic proteins, Predicted intracellular proteins	Lipid degradation, Lipid metabolism	Hydrolase, Transducer		Evidence at protein level	Evidence at protein level	Evidence at protein level	Evidence at protein level	Tissue enhanced	Detected in many		bone marrow: 51.9;lymphoid tissue: 39.7	Cell type enhanced	Detected in many		Hofbauer cells: 37.2;Kupffer cells: 41.0;Macrophages: 43.4;Microglial cells: 37.6;monocytes: 55.3;NK-cells: 22.7;Schwann cells: 22.4	Cell type enhanced	Detected in many		central nervous system macrophage: 125.3;leukocyte: 47.2	Low cancer specificity	Detected in many			Low region specificity	Detected in all			Low immune cell specificity	Detected in many			Low lineage specificity	Detected in many			Cancer enriched	Detected in many	5	Leukemia: 35.8	Adrenal gland - Macrophages, Breast - T-cells, Kidney - T-cells, Prostate - T-cells, Thyroid gland - T-cells	Not detected	Not detected
PLCG1	NCKAP3, PLC-II, PLC1, PLC148, PLCgamma1	ENSG00000124181	Phospholipase C gamma 1	P19174	20	41136960-41196801	Cancer-related genes, Enzymes, Metabolic proteins, Plasma proteins, Predicted intracellular proteins, RAS pathway related proteins	Host-virus interaction, Lipid degradation, Lipid metabolism	Hydrolase, Transducer	Cancer-related genes, Disease variant	Evidence at protein level	Evidence at protein level	Evidence at protein level	Evidence at protein level	Low tissue specificity	Detected in all			Cell type enhanced	Detected in many		Adipocytes: 32.2;Astrocytes: 65.6	Low cell type specificity	Detected in all			Low cancer specificity	Detected in all			Low region specificity	Detected in all			Group enriched	Detected in many	8	gdT-cell: 4.7;MAIT T-cell: 6.4;memory CD4 T-cell: 4.1;memory CD8 T-cell: 3.9;naive CD4 T-cell: 4.3;naive CD8 T-cell: 4.3;NK-cell: 3.4;T-reg: 3.8	Group enriched	Detected in many	9	NK-cells: 3.4;T-cells: 6.4	Low cancer specificity	Detected in all				Low region specificity	Detected in all
PMM2	CDG1, CDG1a, CDGS, PMI, PMI1	ENSG00000140650	Phosphomannomutase 2	O15305	16	8788823-8862534	Disease related genes, Enzymes, Human disease related genes, Metabolic proteins, Potential drug targets, Predicted intracellular proteins		Isomerase	Congenital disorder of glycosylation, Disease variant	Evidence at protein level	Evidence at protein level	Evidence at protein level	Evidence at protein level	Low tissue specificity	Detected in all			Low cell type specificity	Detected in many			Low cell type specificity	Detected in all			Low cancer specificity	Detected in all			Low region specificity	Detected in all			Immune cell enriched	Detected in all	8	basophil: 207.1	Lineage enriched	Detected in all	12	granulocytes: 207.1	Low cancer specificity	Detected in all				Low region specificity	Detected in all
POGZ	KIAA0461, ZNF280E, ZNF635	ENSG00000143442	Pogo transposable element derived with ZNF domain	Q7Z3K3	1	151402724-151459494	Disease related genes, Plasma proteins, Predicted intracellular proteins, Transcription factors	Cell cycle, Cell division, DNA damage, DNA recombination, DNA repair	DNA-binding	Autism spectrum disorder, Disease variant, Intellectual disability	Evidence at protein level	Evidence at protein level	Evidence at protein level	Evidence at protein level	Low tissue specificity	Detected in all			Cell type enhanced	Detected in all		Oligodendrocytes: 323.3	Low cell type specificity	Detected in all			Low cancer specificity	Detected in all			Low region specificity	Detected in all			Low immune cell specificity	Detected in many			Low lineage specificity	Detected in all			Low cancer specificity	Detected in all				Low region specificity	Detected in all
POLA2	FLJ21662	ENSG00000014138	DNA polymerase alpha 2, accessory subunit	Q14181	11	65261913-65305959	Metabolic proteins, Predicted intracellular proteins	DNA replication			Evidence at protein level	Evidence at protein level	Evidence at protein level	Evidence at protein level	Low tissue specificity	Detected in many			Cell type enhanced	Detected in many		Erythroid cells: 27.1;Spermatocytes: 23.1	Low cell type specificity	Detected in all			Low cancer specificity	Detected in all			Low region specificity	Detected in all			Low immune cell specificity	Detected in many			Low lineage specificity	Detected in all			Low cancer specificity	Detected in all			Skin - Mitotic cells (Skin), Testis - Spermatocytes	Low region specificity	Detected in all
PPARA	hPPAR, NR1C1, PPAR	ENSG00000186951	Peroxisome proliferator activated receptor alpha	Q07869	22	46150521-46243755	FDA approved drug targets, Metabolic proteins, Nuclear receptors, Predicted intracellular proteins, Transcription factors, Transporters	Biological rhythms, Transcription, Transcription regulation	Activator, DNA-binding, Receptor	FDA approved drug targets	Evidence at protein level	Evidence at protein level	Evidence at protein level	Evidence at protein level	Tissue enhanced	Detected in all		tongue: 40.9	Cell type enhanced	Detected in many		Cardiomyocytes: 105.9;Hepatocytes: 125.1;Proximal enterocytes: 87.3;Rod photoreceptor cells: 144.6	Cell type enhanced	Detected in all		choroid plexus epithelial cell: 180.2	Low cancer specificity	Detected in all			Low region specificity	Detected in all			Group enriched	Detected in some	5	eosinophil: 9.8;plasmacytoid DC: 2.9	Group enriched	Detected in many	5	dendritic cells: 2.9;granulocytes: 9.8	Low cancer specificity	Detected in all			Adipose subcutaneous - Adipocytes (Subcutaneous), Adipose visceral - Adipocytes (Visceral), Skin - Sebaceous gland cells	Low region specificity	Detected in all
PPID	CYP-40, CypD	ENSG00000171497	Peptidylprolyl isomerase D	Q08752	4	158709127-158723396	Enzymes, Metabolic proteins, Plasma proteins, Predicted intracellular proteins	Apoptosis, Host-virus interaction, Protein transport, Transport	Chaperone, Isomerase, Rotamase		Evidence at protein level	Evidence at protein level	Evidence at protein level	Evidence at protein level	Low tissue specificity	Detected in all			Low cell type specificity	Detected in all			Low cell type specificity	Detected in all			Low cancer specificity	Detected in all			Low region specificity	Detected in all			Low immune cell specificity	Detected in all			Low lineage specificity	Detected in all			Low cancer specificity	Detected in all			Liver - Hepatocytes, Testis - Spermatocytes, Testis - Spermatogonia	Low region specificity	Detected in all
PPL		ENSG00000118898	Periplakin	O60437	16	4882507-4960741	Plasma proteins, Predicted intracellular proteins	Keratinization			Evidence at protein level	Evidence at protein level	Evidence at protein level	Evidence at protein level	Tissue enhanced	Detected in many		esophagus: 707.7;vagina: 279.9	Cell type enhanced	Detected in many		Alveolar cells type 1: 126.5;Salivary duct cells: 99.7;Squamous epithelial cells: 161.6;Suprabasal keratinocytes: 363.2	Cell type enhanced	Detected in many		ependymal cell: 33.9	Low cancer specificity	Detected in all			Low region specificity	Detected in all			Not detected in immune cells	Not detected			Not detected	Not detected			Cancer enhanced	Detected in many		Gallbladder cancer: 108.1	Adipose visceral - Mesothelial cells, Adrenal gland - Adrenal cortex cells, Skeletal muscle - Macrophages	Not detected	Not detected
PPP2R3B	PPP2R3L, PPP2R3LY, PR48, PR70	ENSG00000167393	Protein phosphatase 2 regulatory subunit B''beta	Q9Y5P8	X	333933-386955	Predicted intracellular proteins				Evidence at protein level	Evidence at protein level	Evidence at protein level	Evidence at protein level	Group enriched	Detected in many	5	heart muscle: 70.7;skeletal muscle: 99.8	Cell type enhanced	Detected in many		Cardiomyocytes: 56.0;Cone photoreceptor cells: 40.8;Oocytes: 80.9;Skeletal myocytes: 66.4	Not detected	Not detected			Low cancer specificity	Detected in many			Low region specificity	Detected in all			Not detected in immune cells	Not detected			Not detected	Not detected			Low cancer specificity	Detected in all			Heart muscle - Cardiomyocytes
PPP2R3C	C14orf10, FLJ20644, G4-1, G5PR	ENSG00000092020	Protein phosphatase 2 regulatory subunit B''gamma	Q969Q6	14	35085467-35122517	Disease related genes, Human disease related genes, Predicted intracellular proteins			Cone-rod dystrophy, Deafness, Disease variant	Evidence at protein level	Evidence at protein level	Evidence at protein level	Evidence at protein level	Low tissue specificity	Detected in all			Cell type enhanced	Detected in all		Early spermatids: 467.9;Late spermatids: 261.0;Spermatocytes: 201.4	Low cell type specificity	Detected in all			Low cancer specificity	Detected in all			Low region specificity	Detected in all			Low immune cell specificity	Detected in all			Low lineage specificity	Detected in all			Low cancer specificity	Detected in all			Skin - Endothelial cells, Testis - Early spermatids	Low region specificity	Detected in all
[truncated: 216 more rows]
[truncated: 57 more columns]
